# Supplementary material for: Electrophilic monoiodination of terminal alkenes
Source: Royal Society of Chemistry journal article supplement (doi:10.1039/c3ob27348b), 2013-01-01
Supplement: c3ob27348b.pdf [file c3ob27348b.pdf]

# Electrophilic Monoiodination of Terminal Alkenes

Sergiy V. Yemets,<sup>a</sup> Tatyana E. Shubina<sup>b</sup> and Pavel A. Krasutsky\*<sup>a</sup>

<sup>a</sup> *University of Minnesota, Natural Resources Research Institute, 5013 Miller Trunk Highway, Duluth, MN 55811, United States; E-mail: pkrasuts@nrri.umn.edu*

<sup>b</sup> *Computer-Chemie-Centrum and Interdisciplinary Center for Molecular Materials, University Erlangen-Nuremberg, Nögelsbachstr 25, Germany 91052*

## Supplementary Information

|                                                        |    |
|--------------------------------------------------------|----|
| 1. <sup>1</sup> H and <sup>13</sup> C NMR spectra..... | 2  |
| 2. Kinetic measurement data.....                       | 21 |
| 3. Optimized geometries for all species.....           | 34 |

## 1. $^1\text{H}$ and $^{13}\text{C}$ NMR spectra

NMR spectra for all synthesized compounds (300 MHz  $^1\text{H}$  NMR and 75 MHz  $^{13}\text{C}$  NMR) were recorded using Varian Unity Inova 300.  $^1\text{H}$  and  $^{13}\text{C}$  NMR chemical shifts are referenced to tetramethylsilane as internal standard and reported in parts per million (ppm).







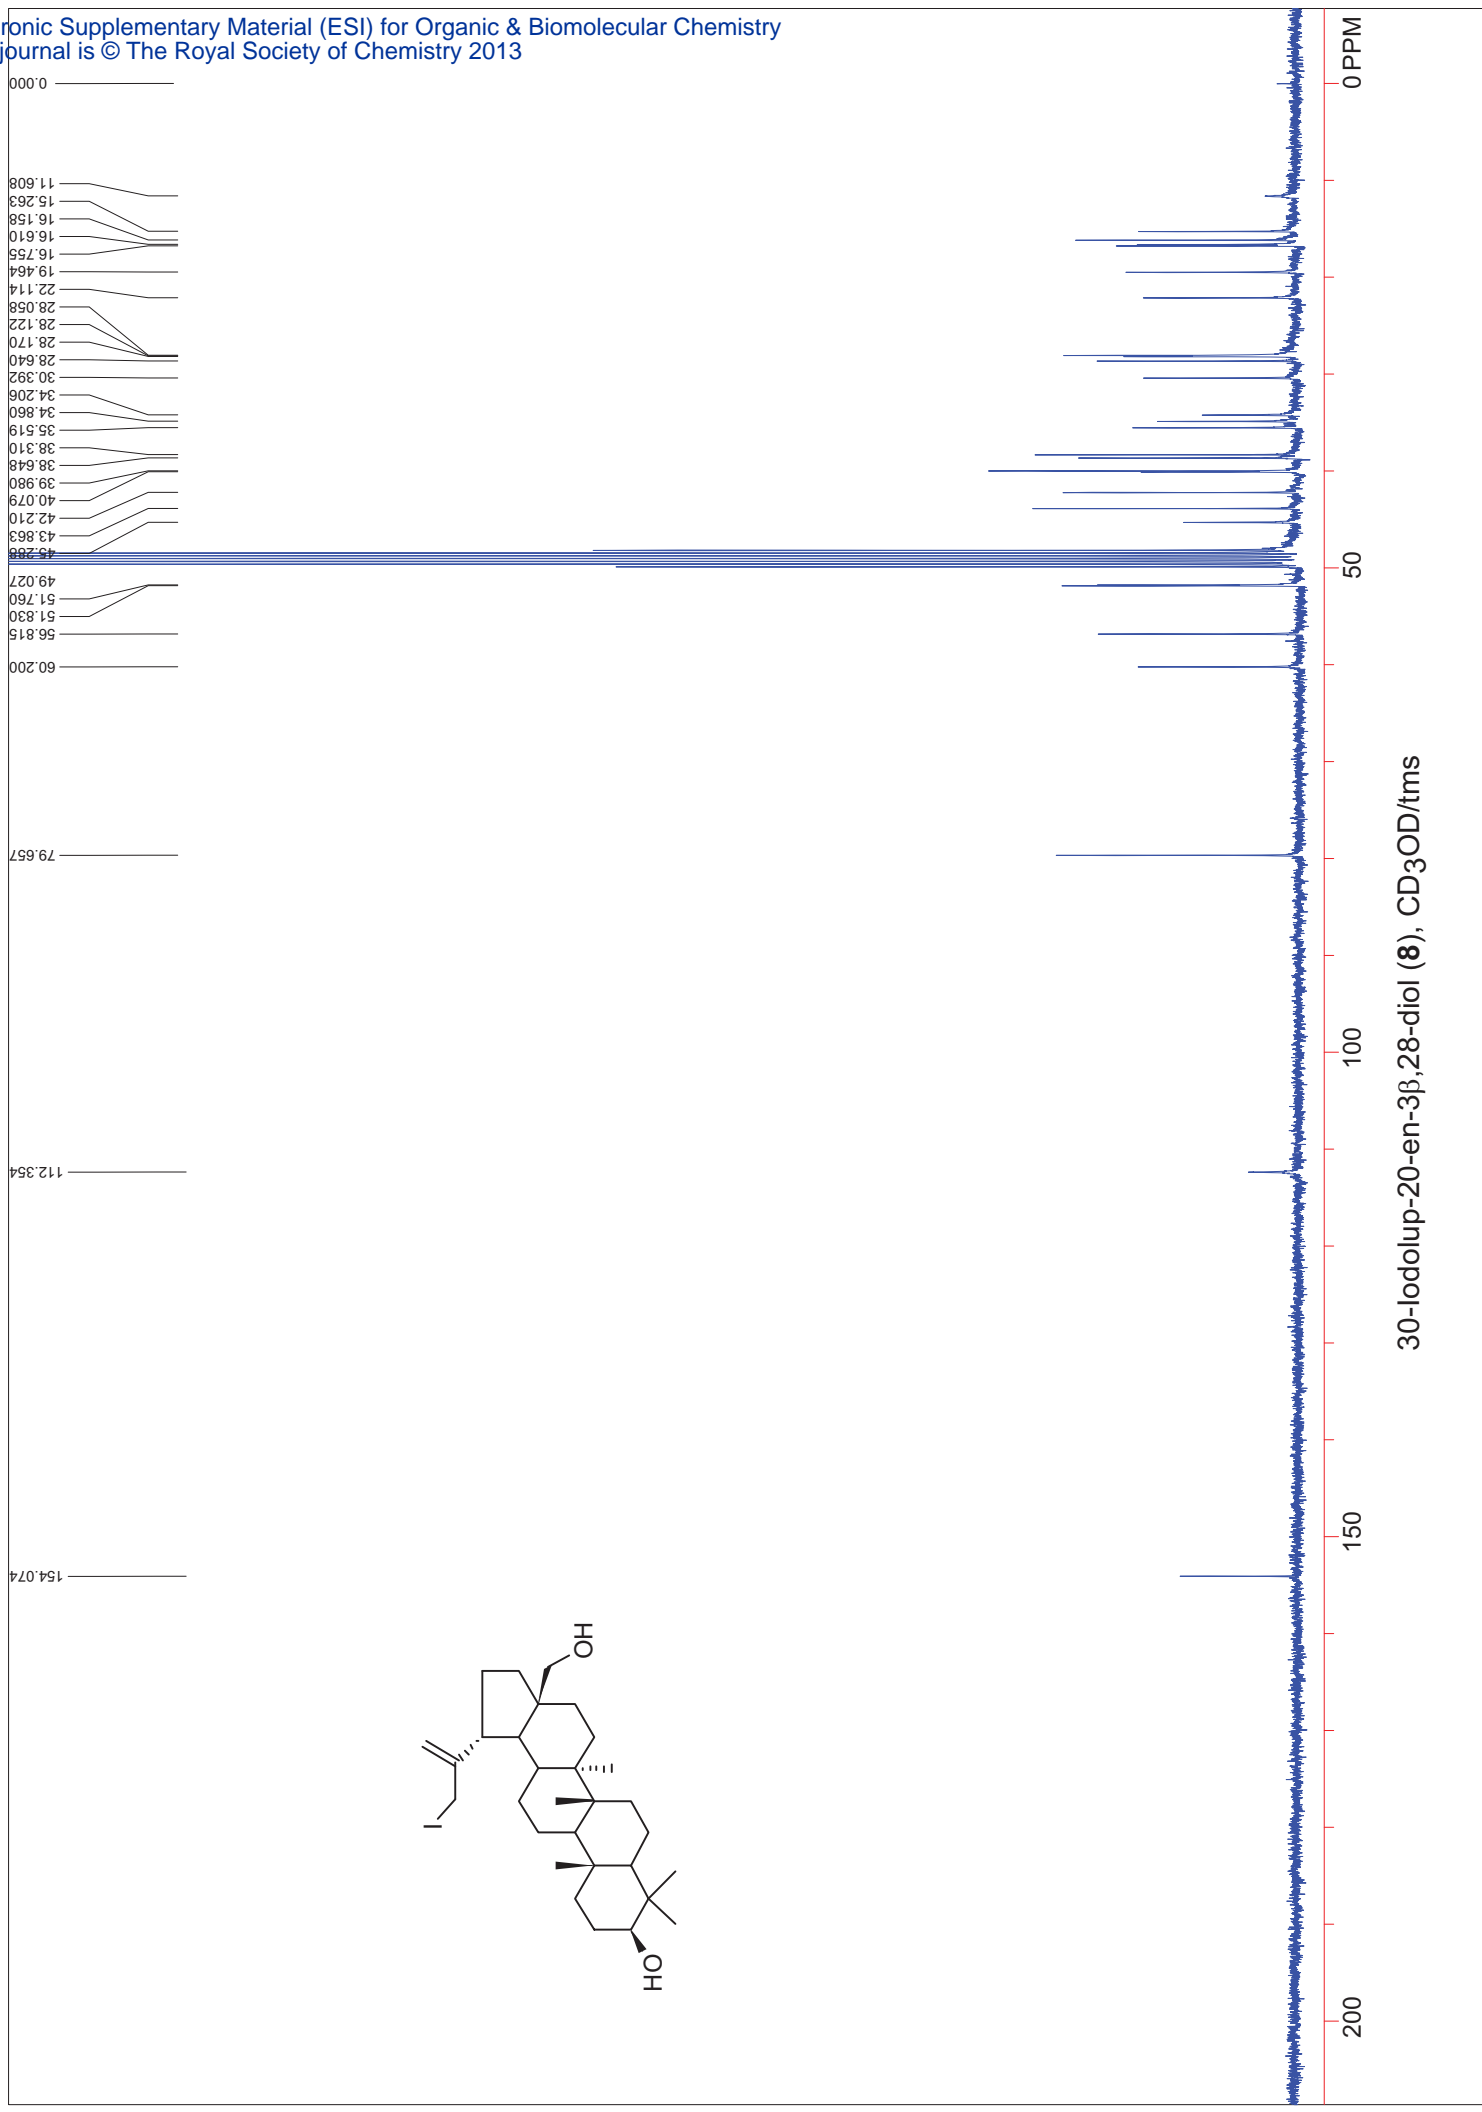

0.000  
11.608  
15.263  
16.158  
16.610  
16.755  
19.464  
22.114  
28.058  
28.122  
28.170  
28.640  
30.392  
34.206  
34.860  
35.519  
38.310  
38.648  
39.980  
40.079  
42.210  
43.863  
45.288

49.027  
51.760  
51.830  
56.815  
60.200

79.657

112.354

154.074

0 PPM  
50  
100  
150  
200

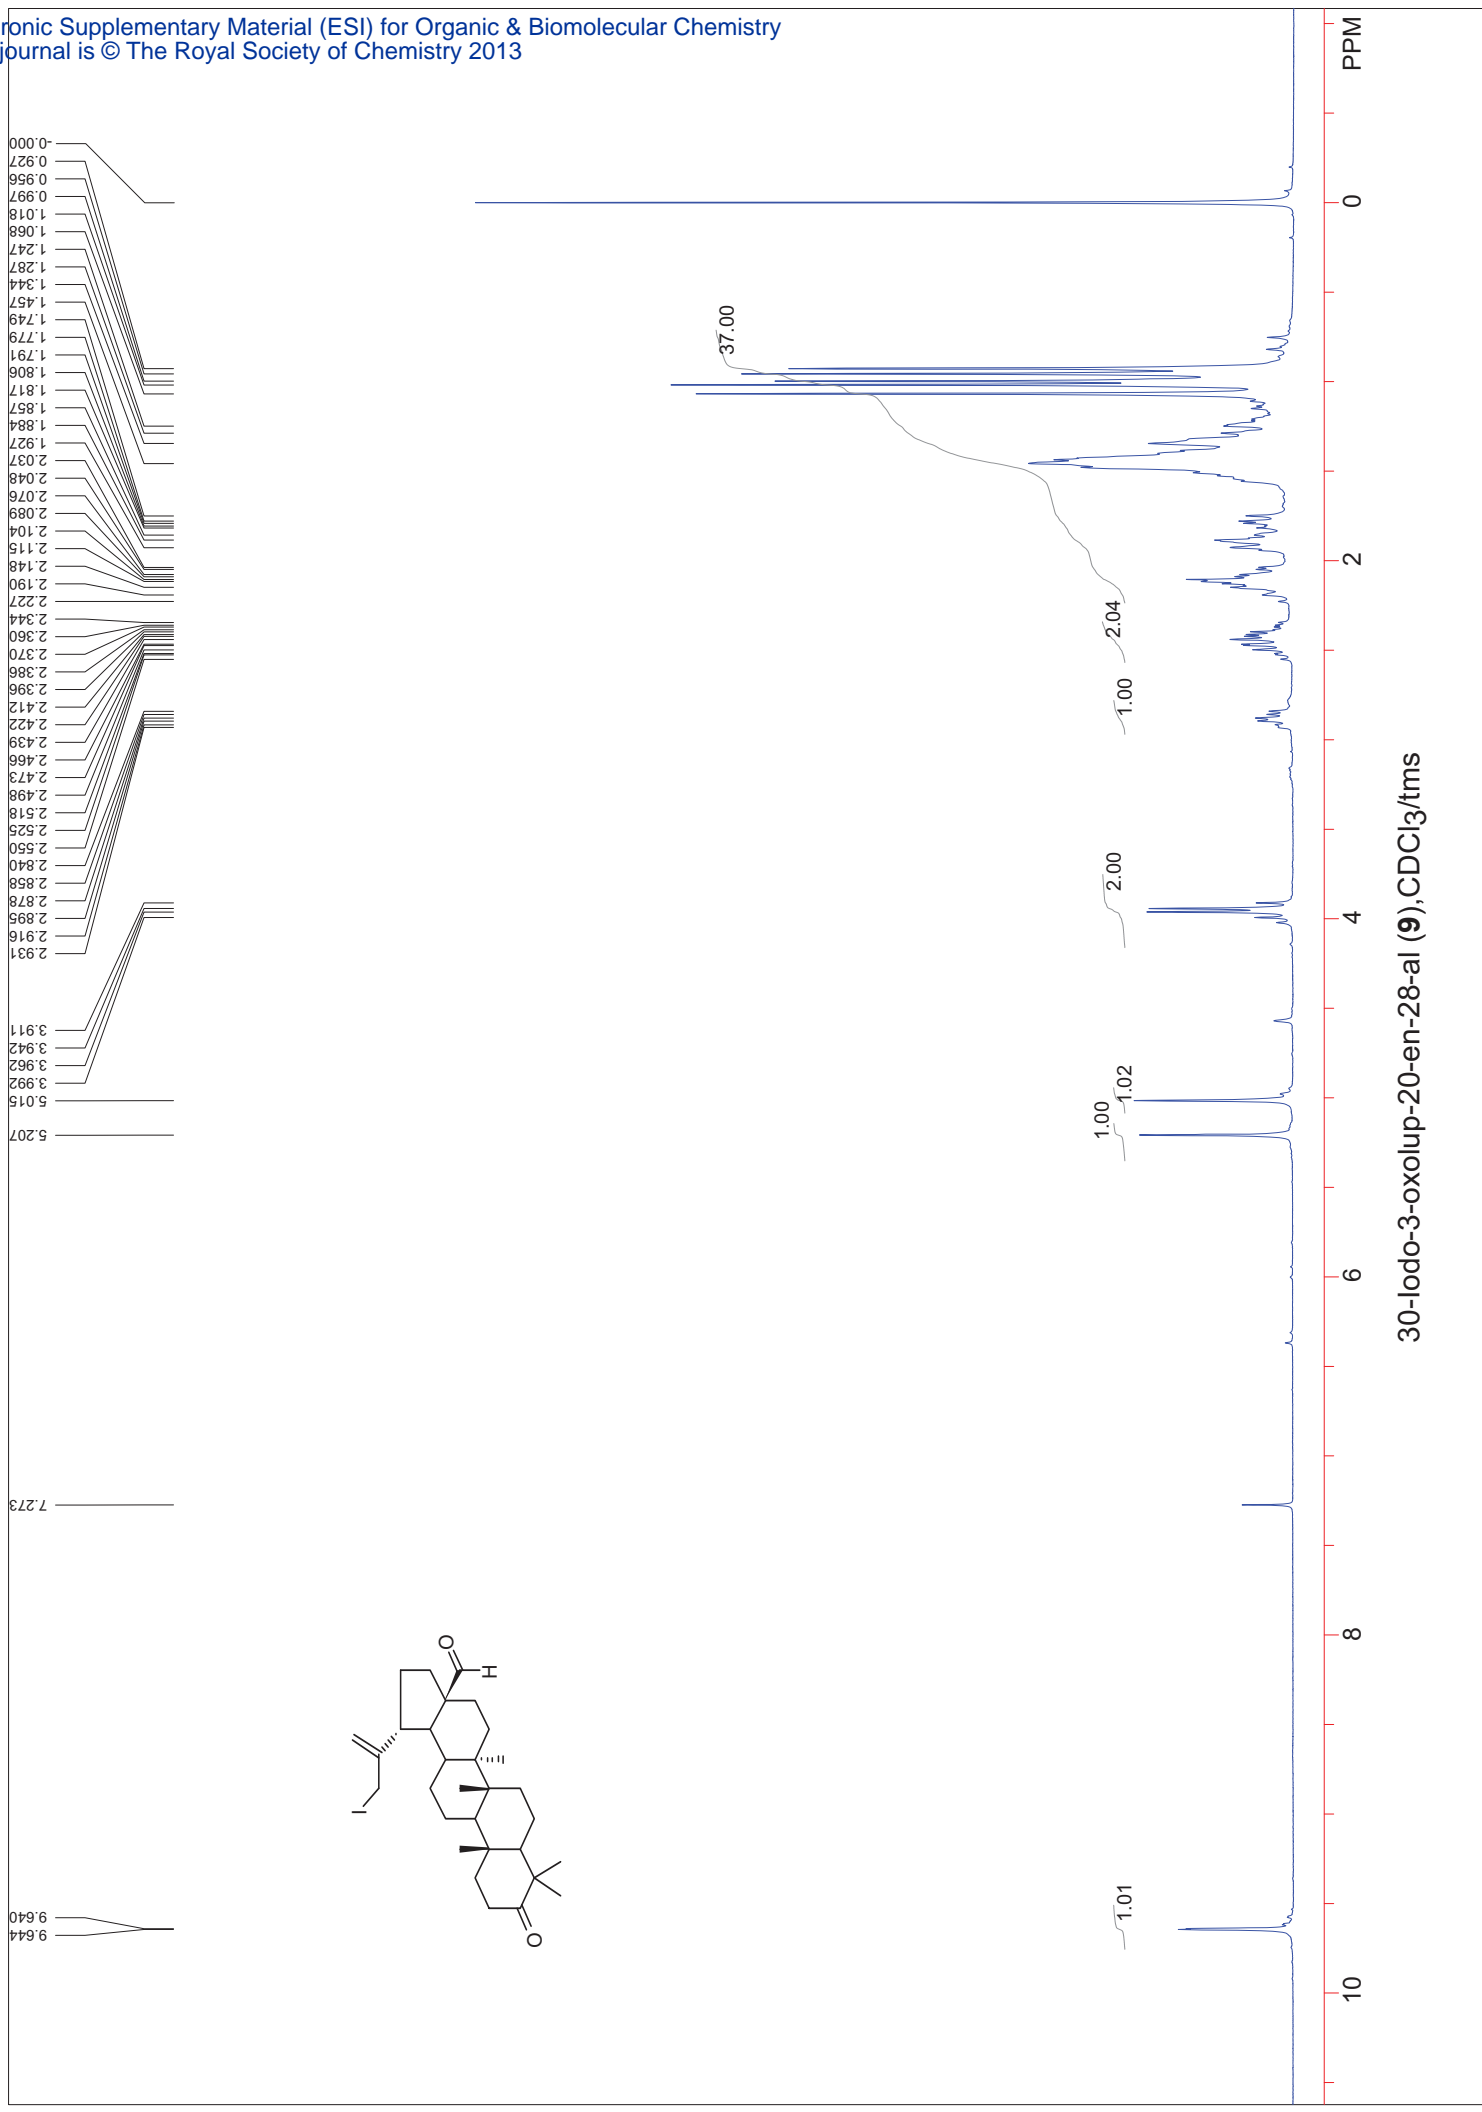

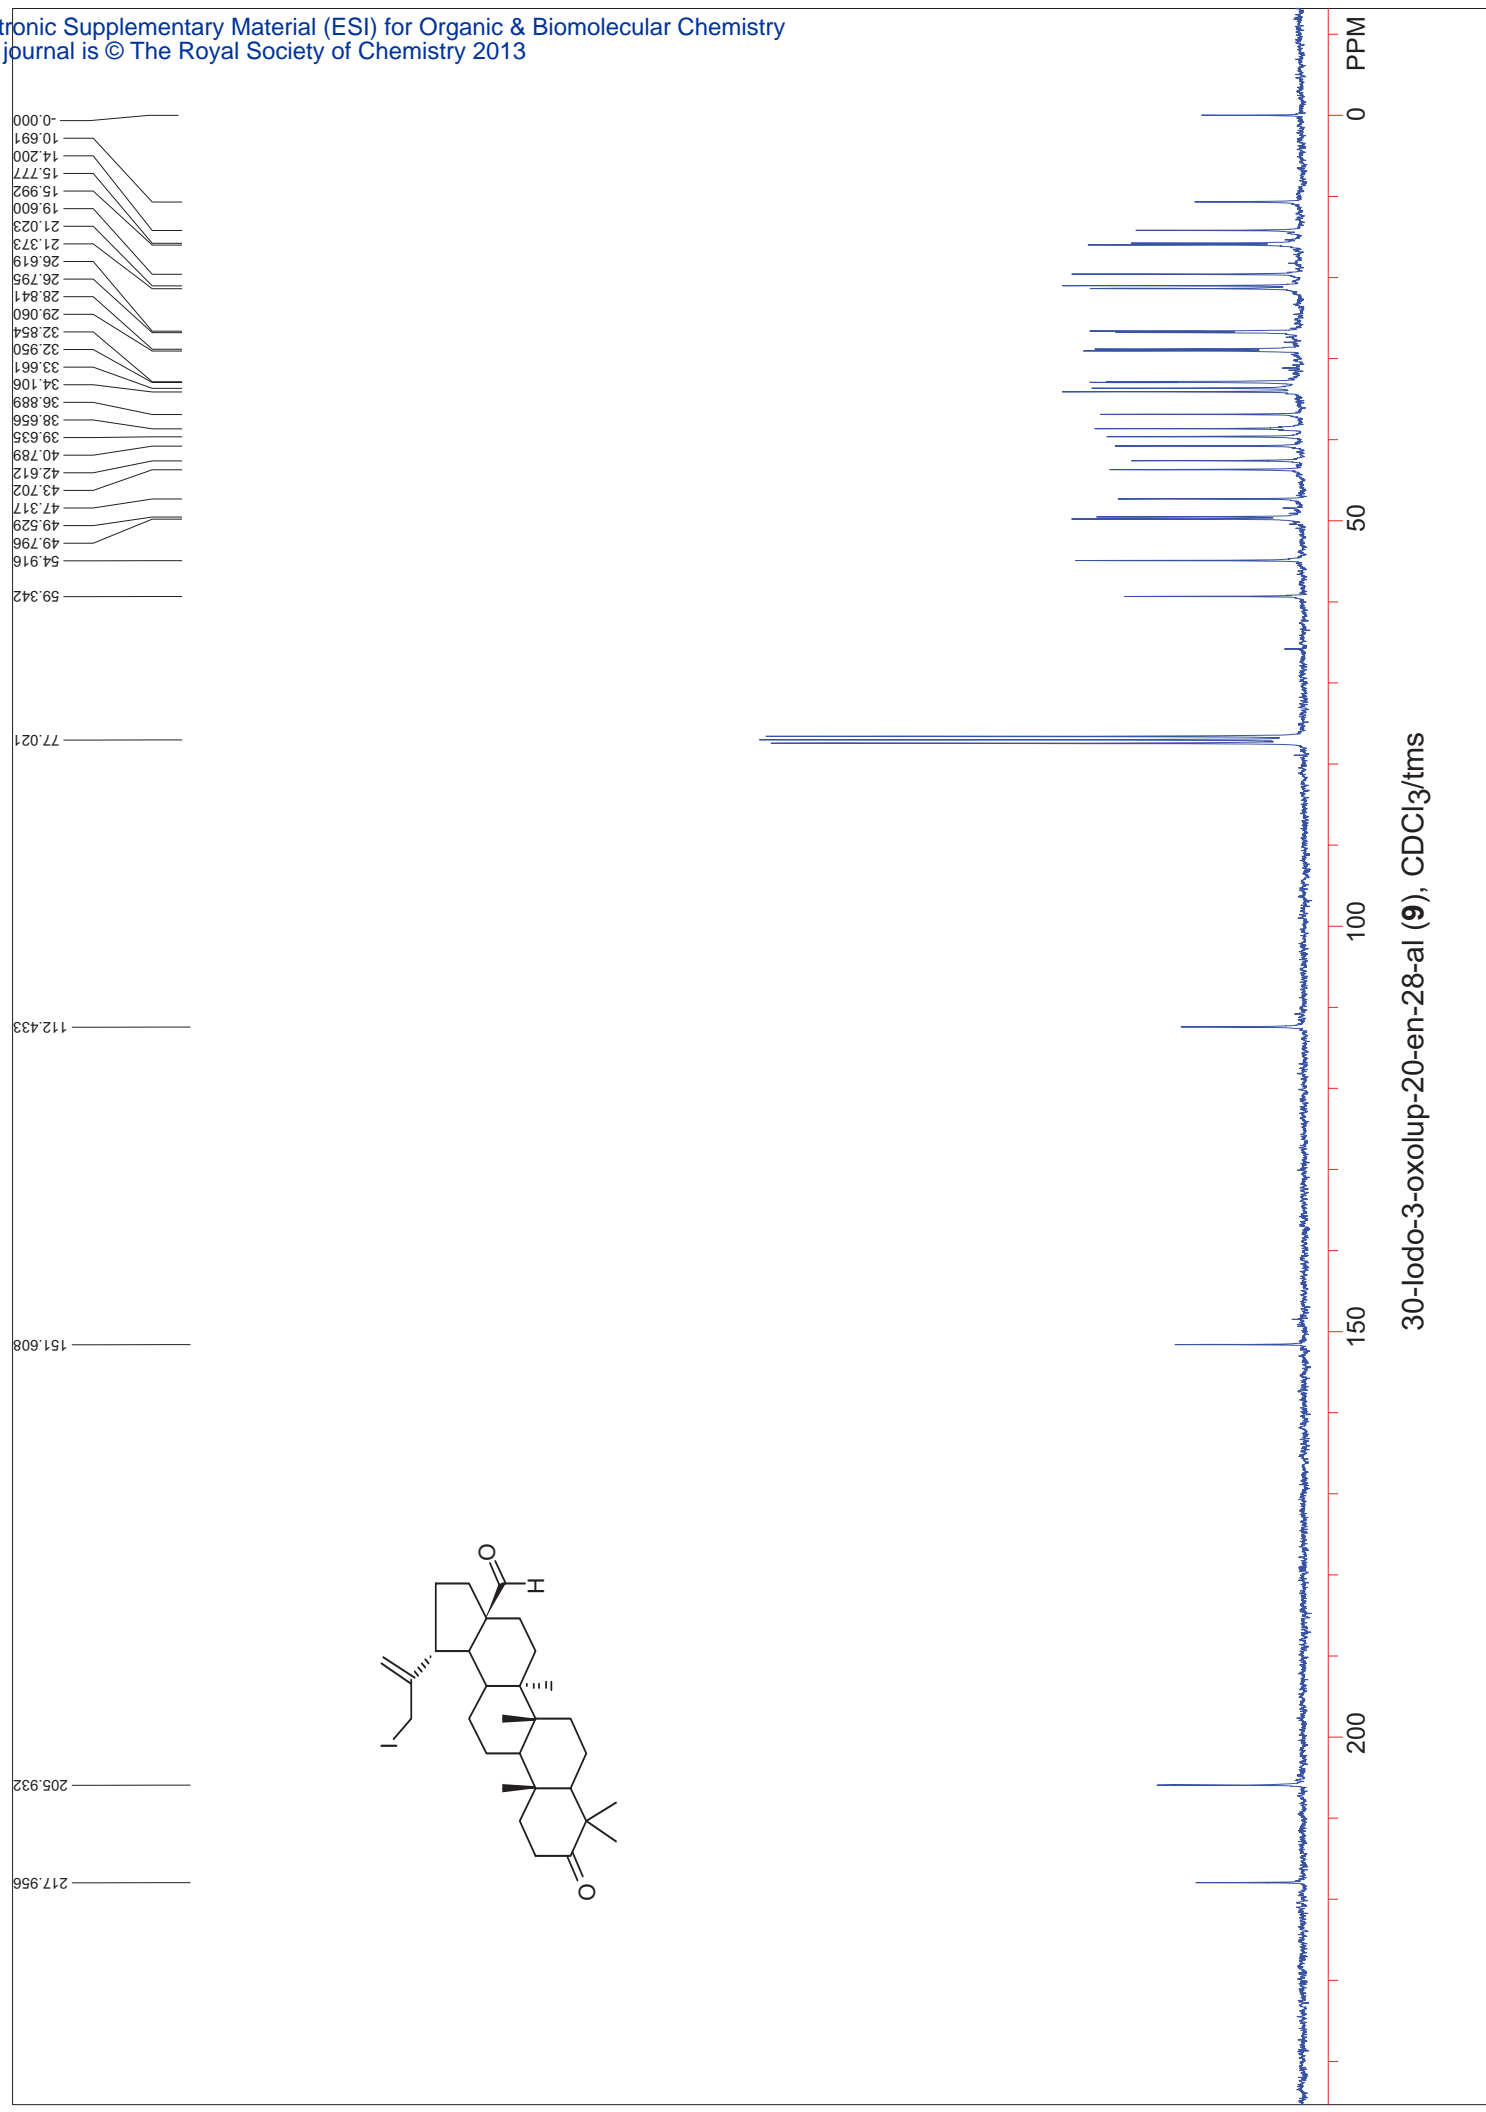



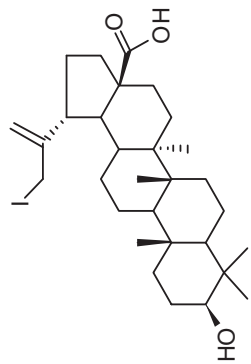

54.43

x H<sub>2</sub>O

0.666  
0.697  
0.753  
0.825  
0.938  
0.965  
0.988  
1.251  
1.380  
1.455  
1.494  
1.530  
1.568  
1.605  
1.645  
1.697  
1.727  
1.766  
1.803  
1.948  
1.973  
1.988  
2.015  
2.037  
2.156  
2.166  
2.195  
2.206  
2.243  
2.278  
2.287  
2.324

2.948  
2.961  
2.985  
2.998  
3.020  
3.035  
3.160  
3.178  
3.196  
3.214

3.913  
3.944  
3.962  
3.992

5.000  
5.189

1.00

1.00

2.00

1.03

1.00

PPM

30-Iodo-3β-hydroxylup-20-en-28-oic acid (**10**), CDCl<sub>3</sub>/tms

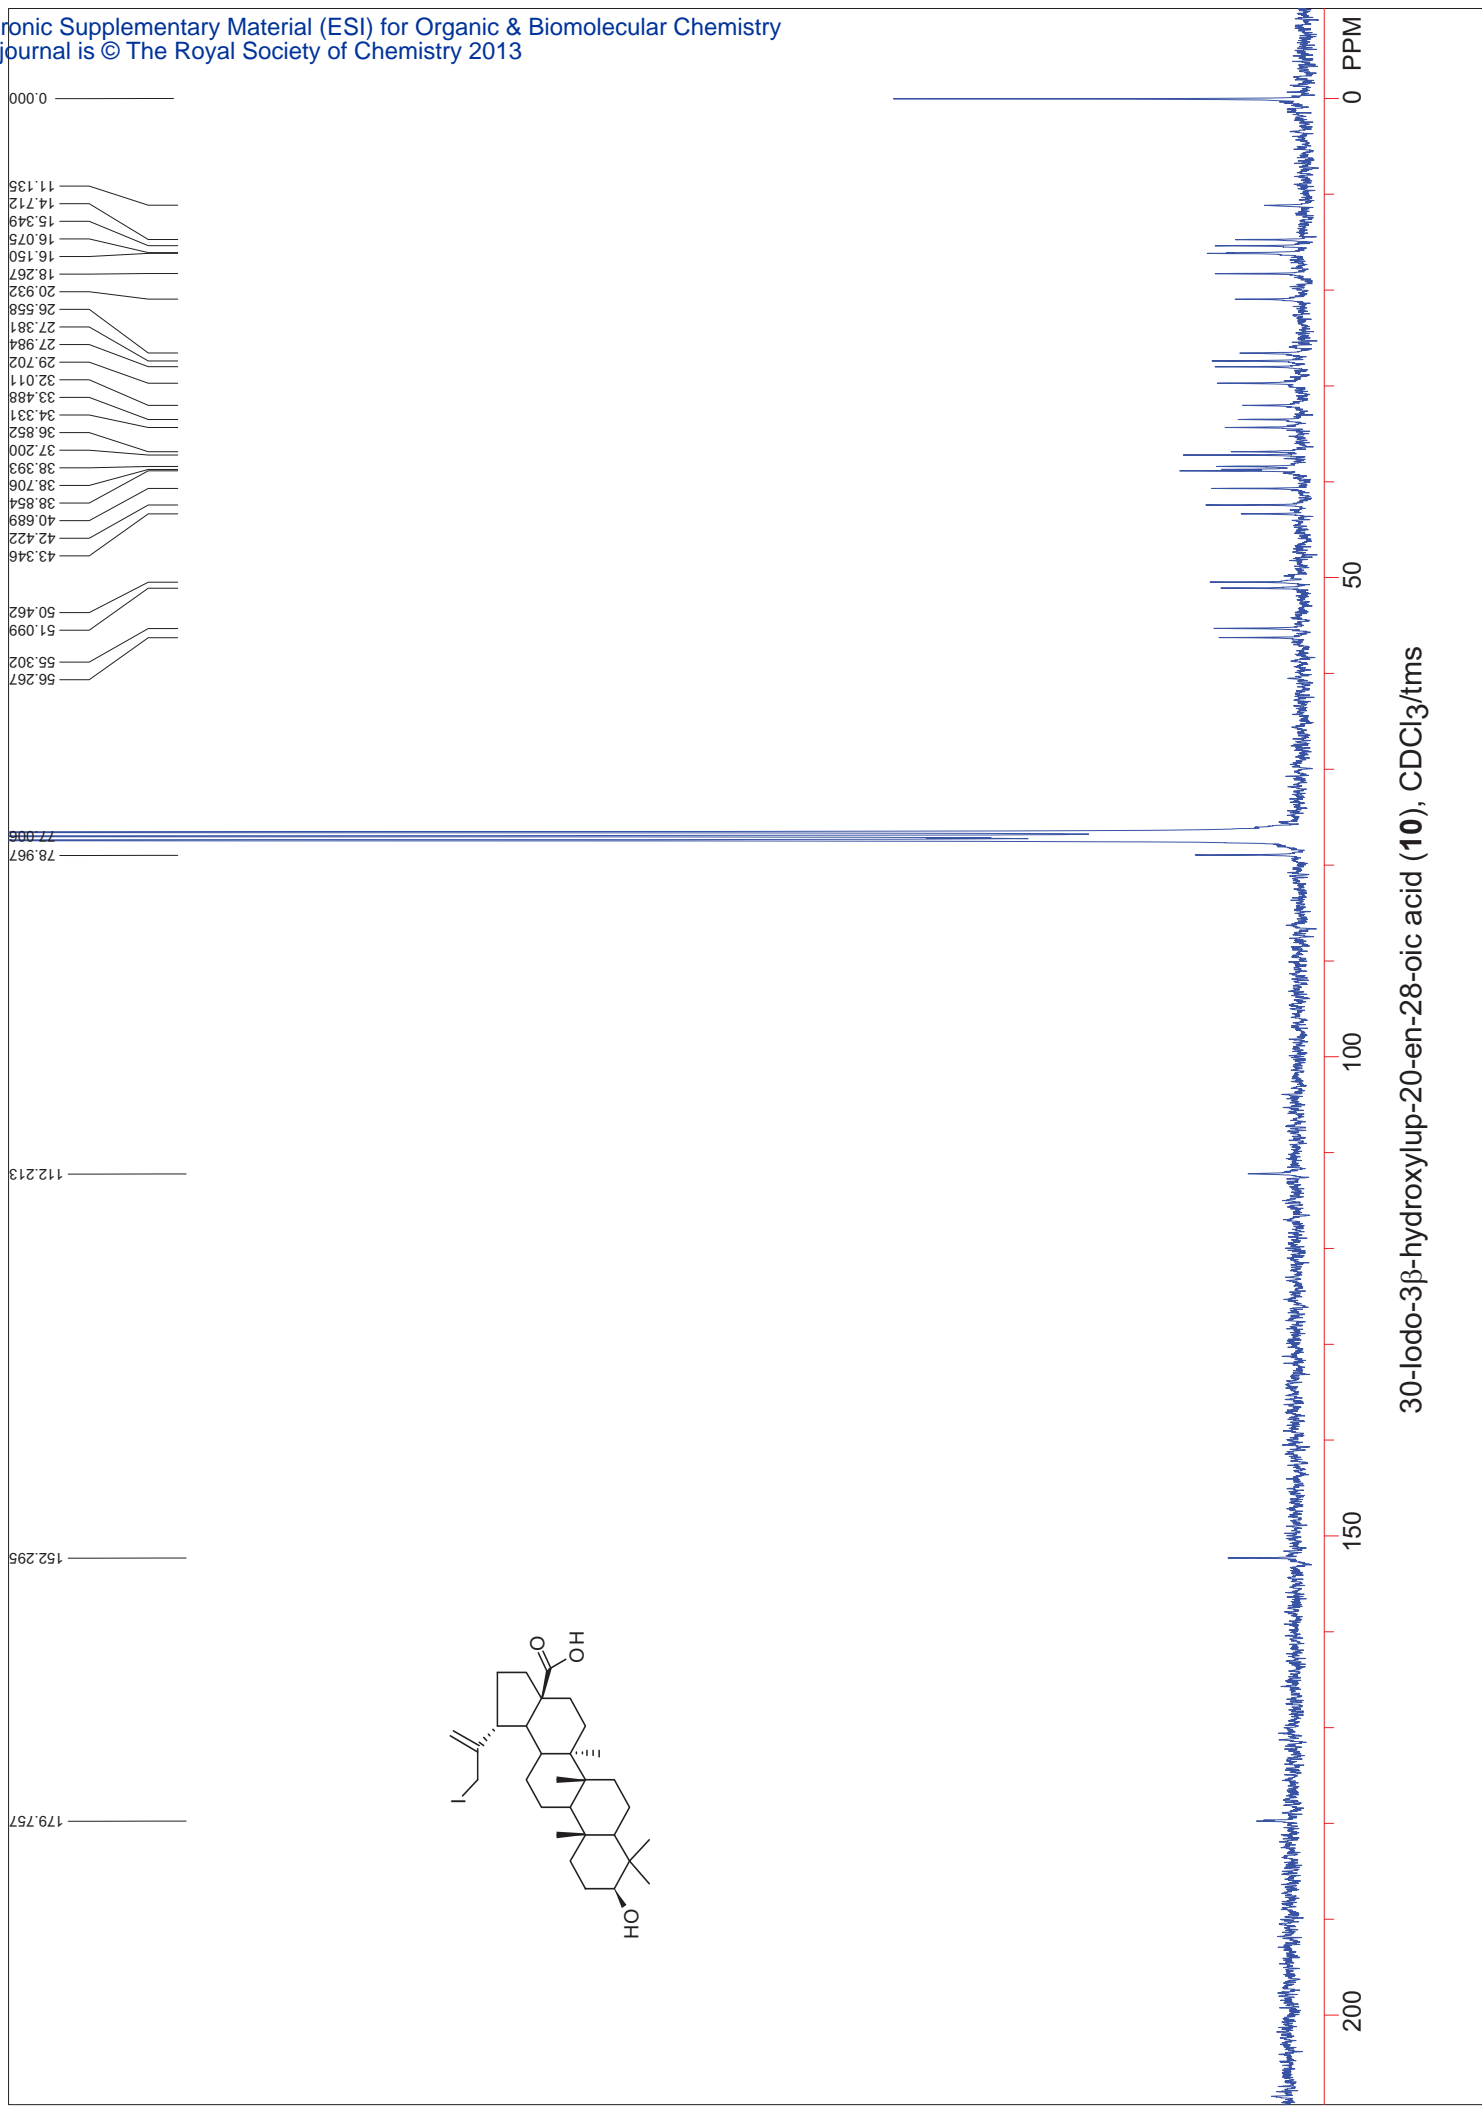

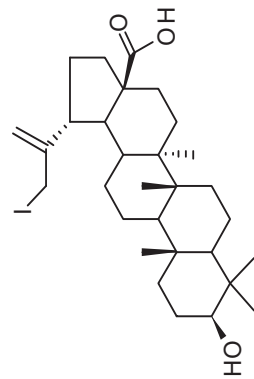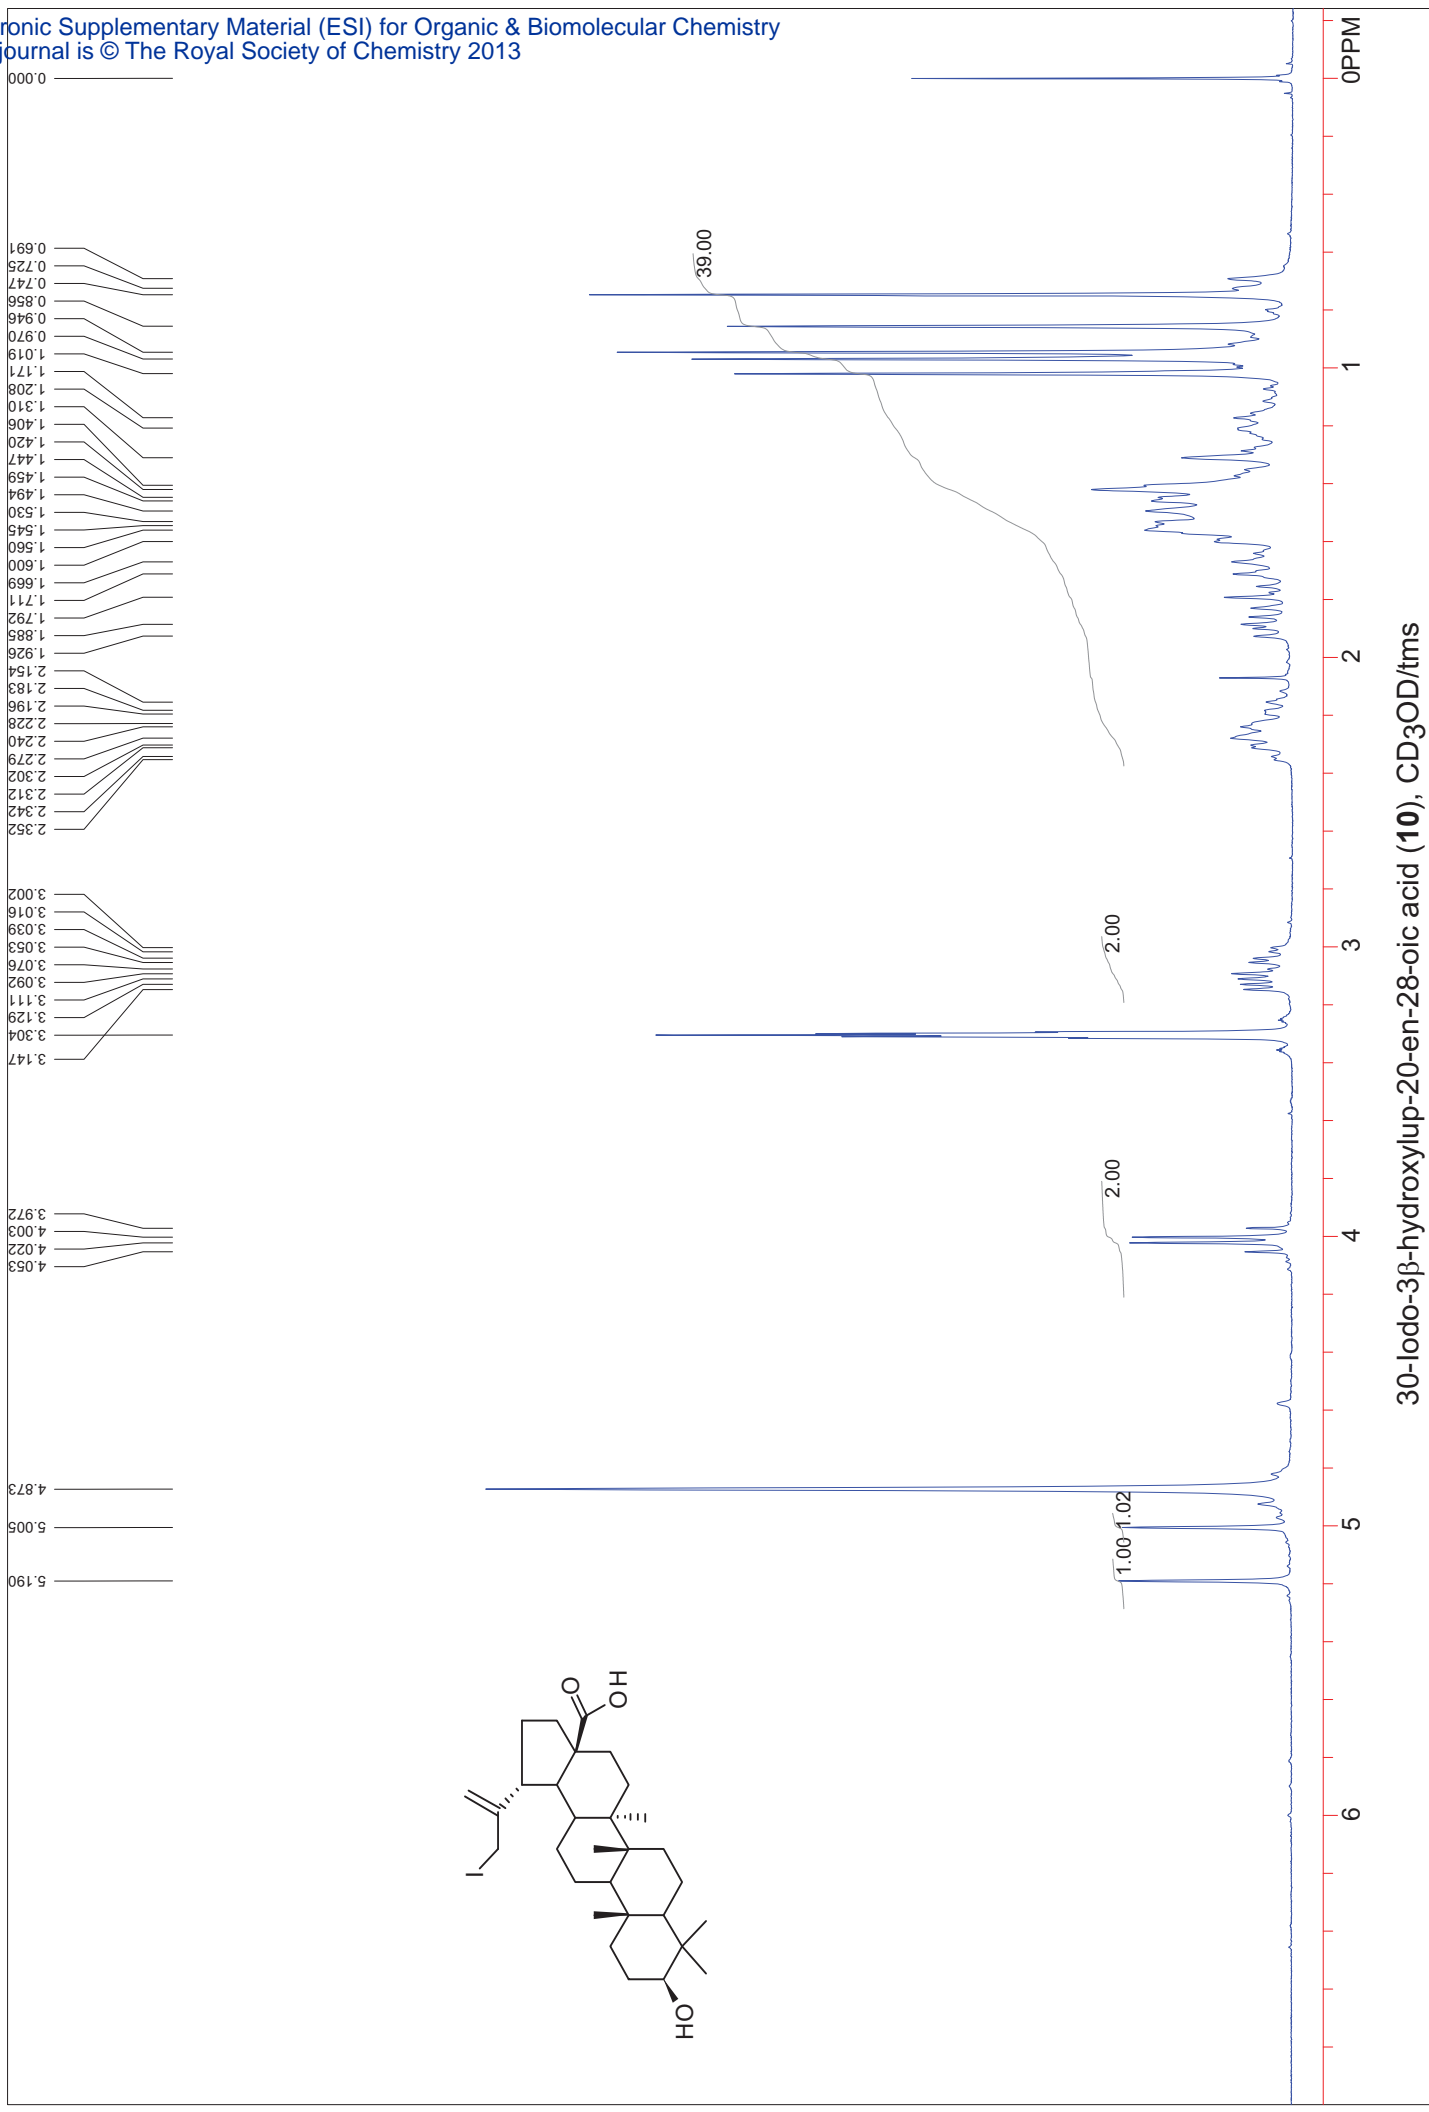

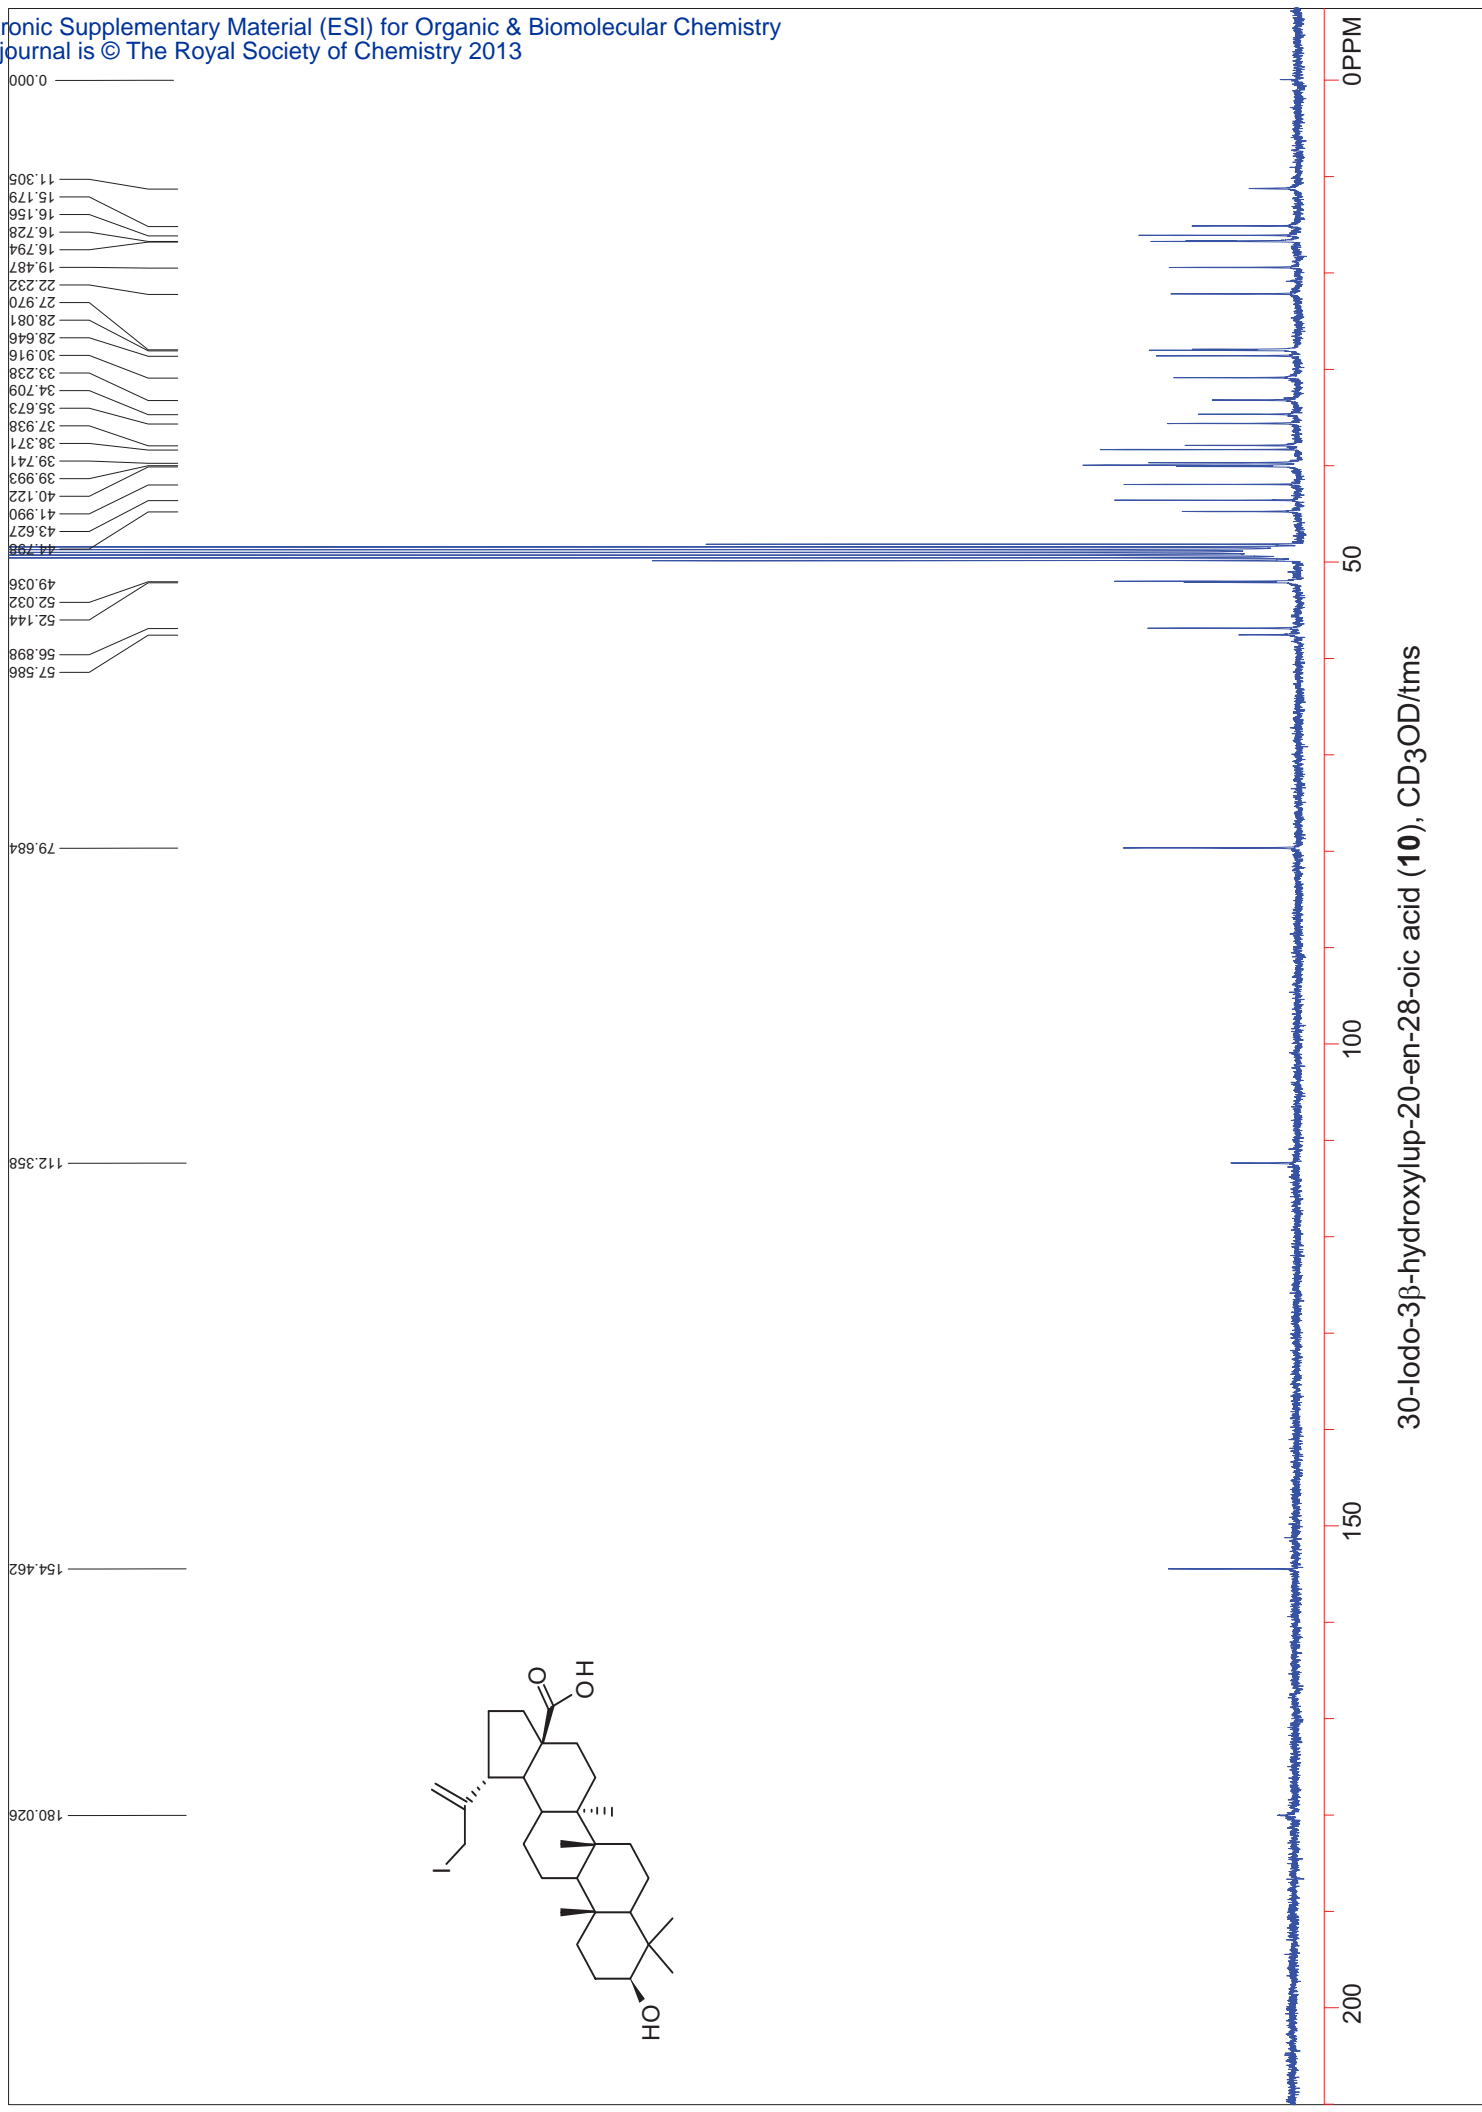

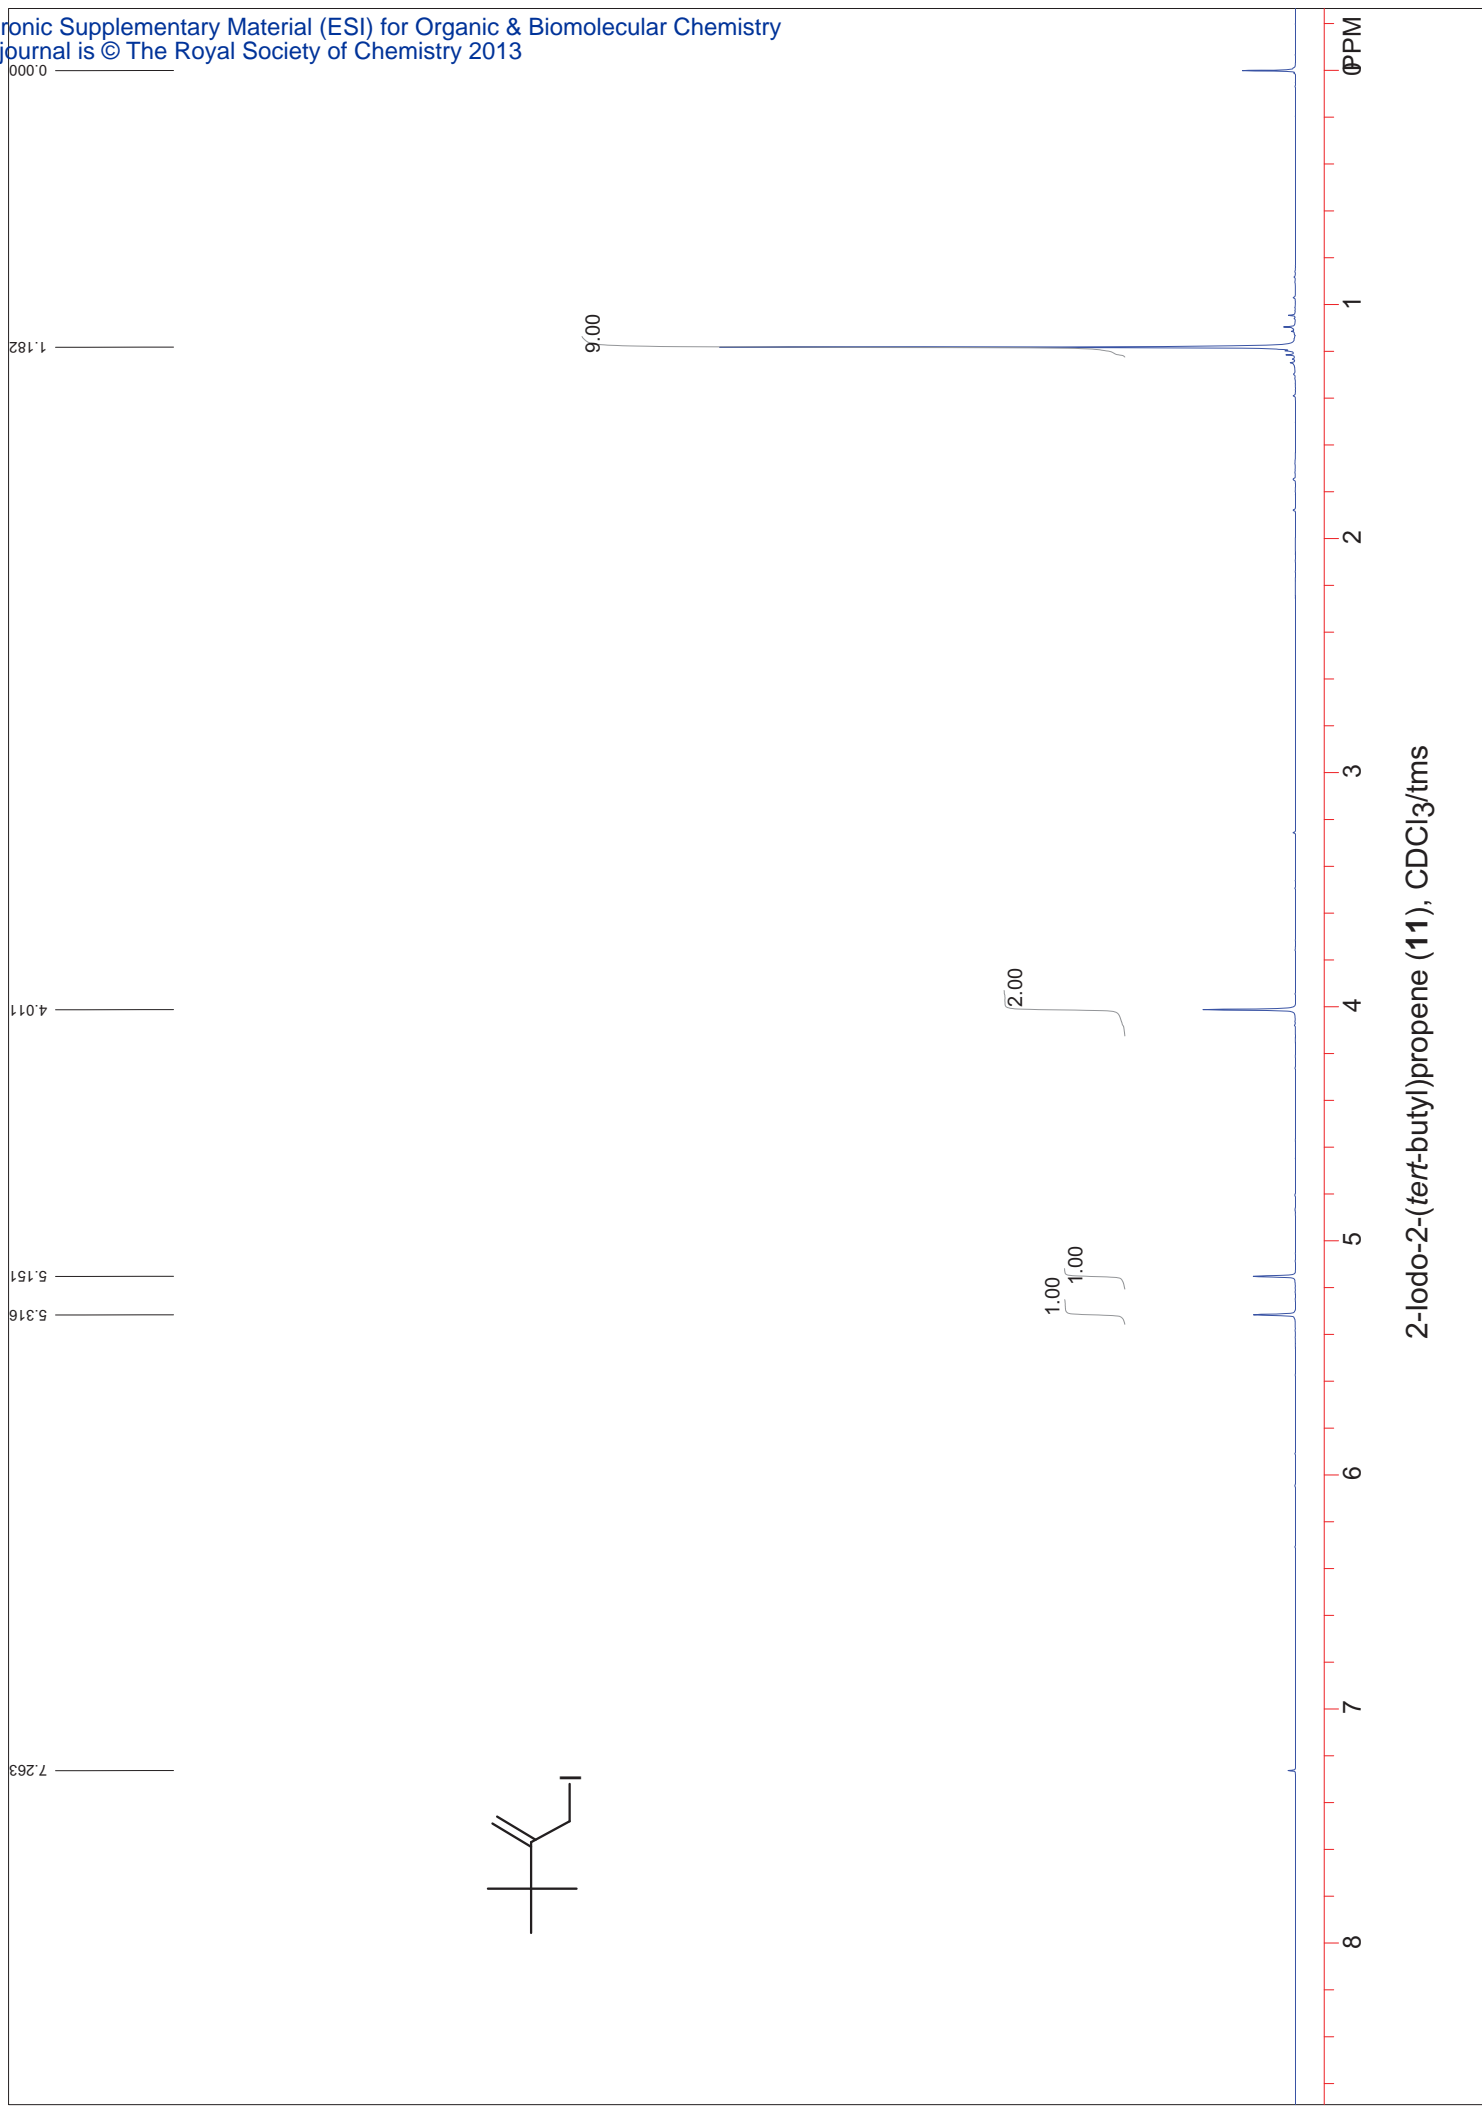

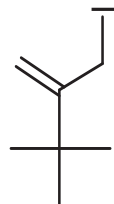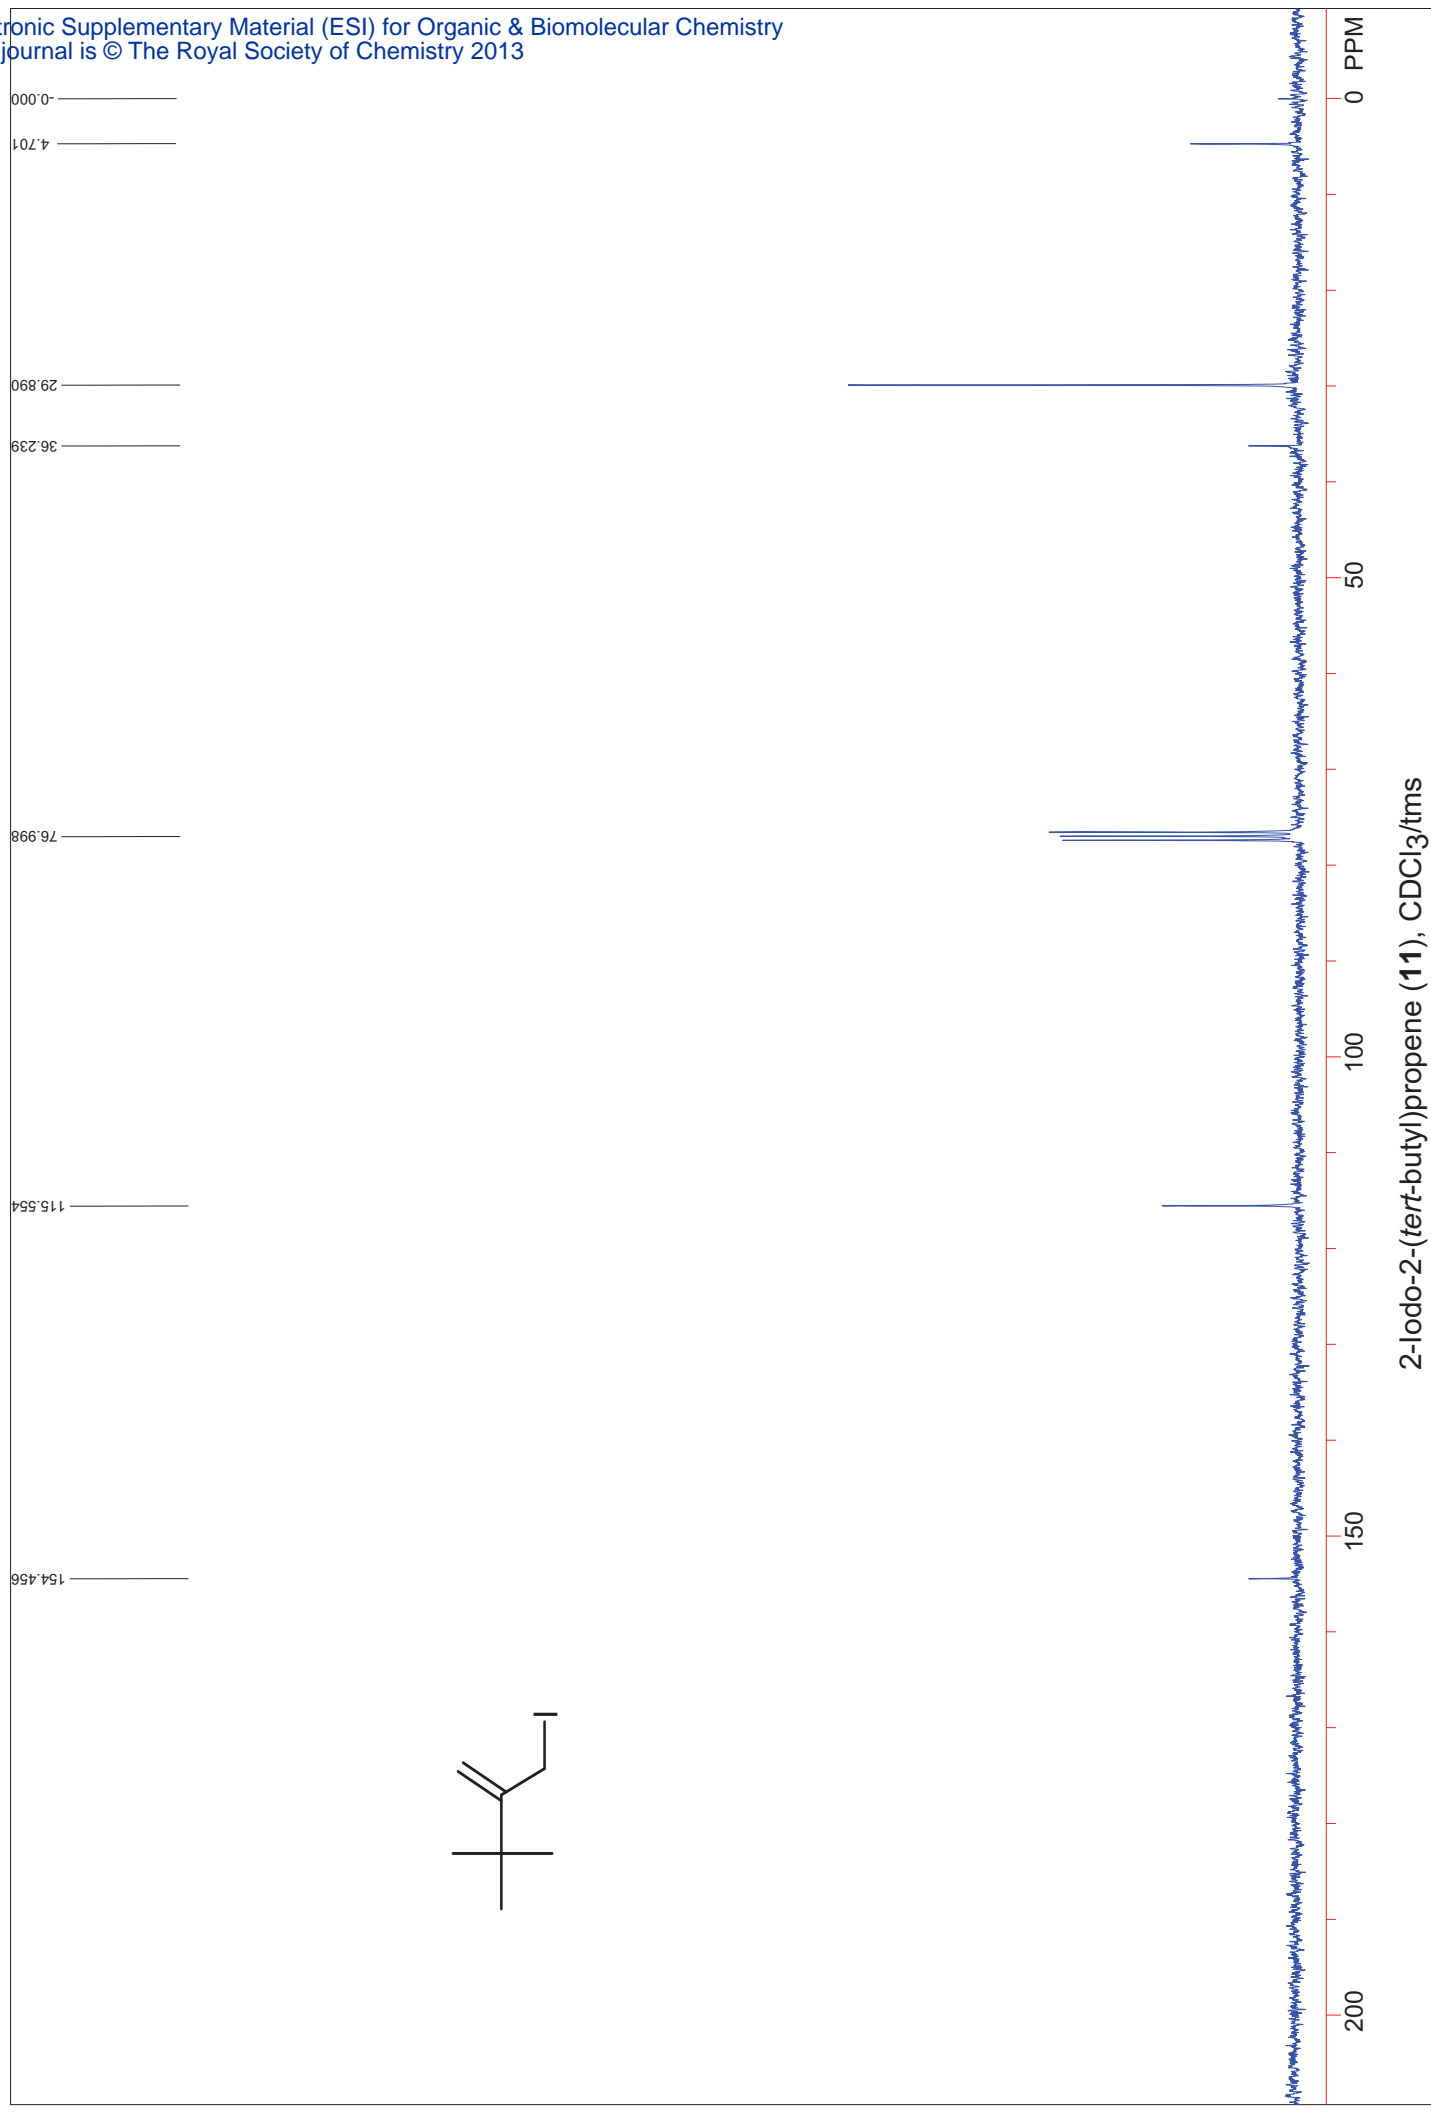

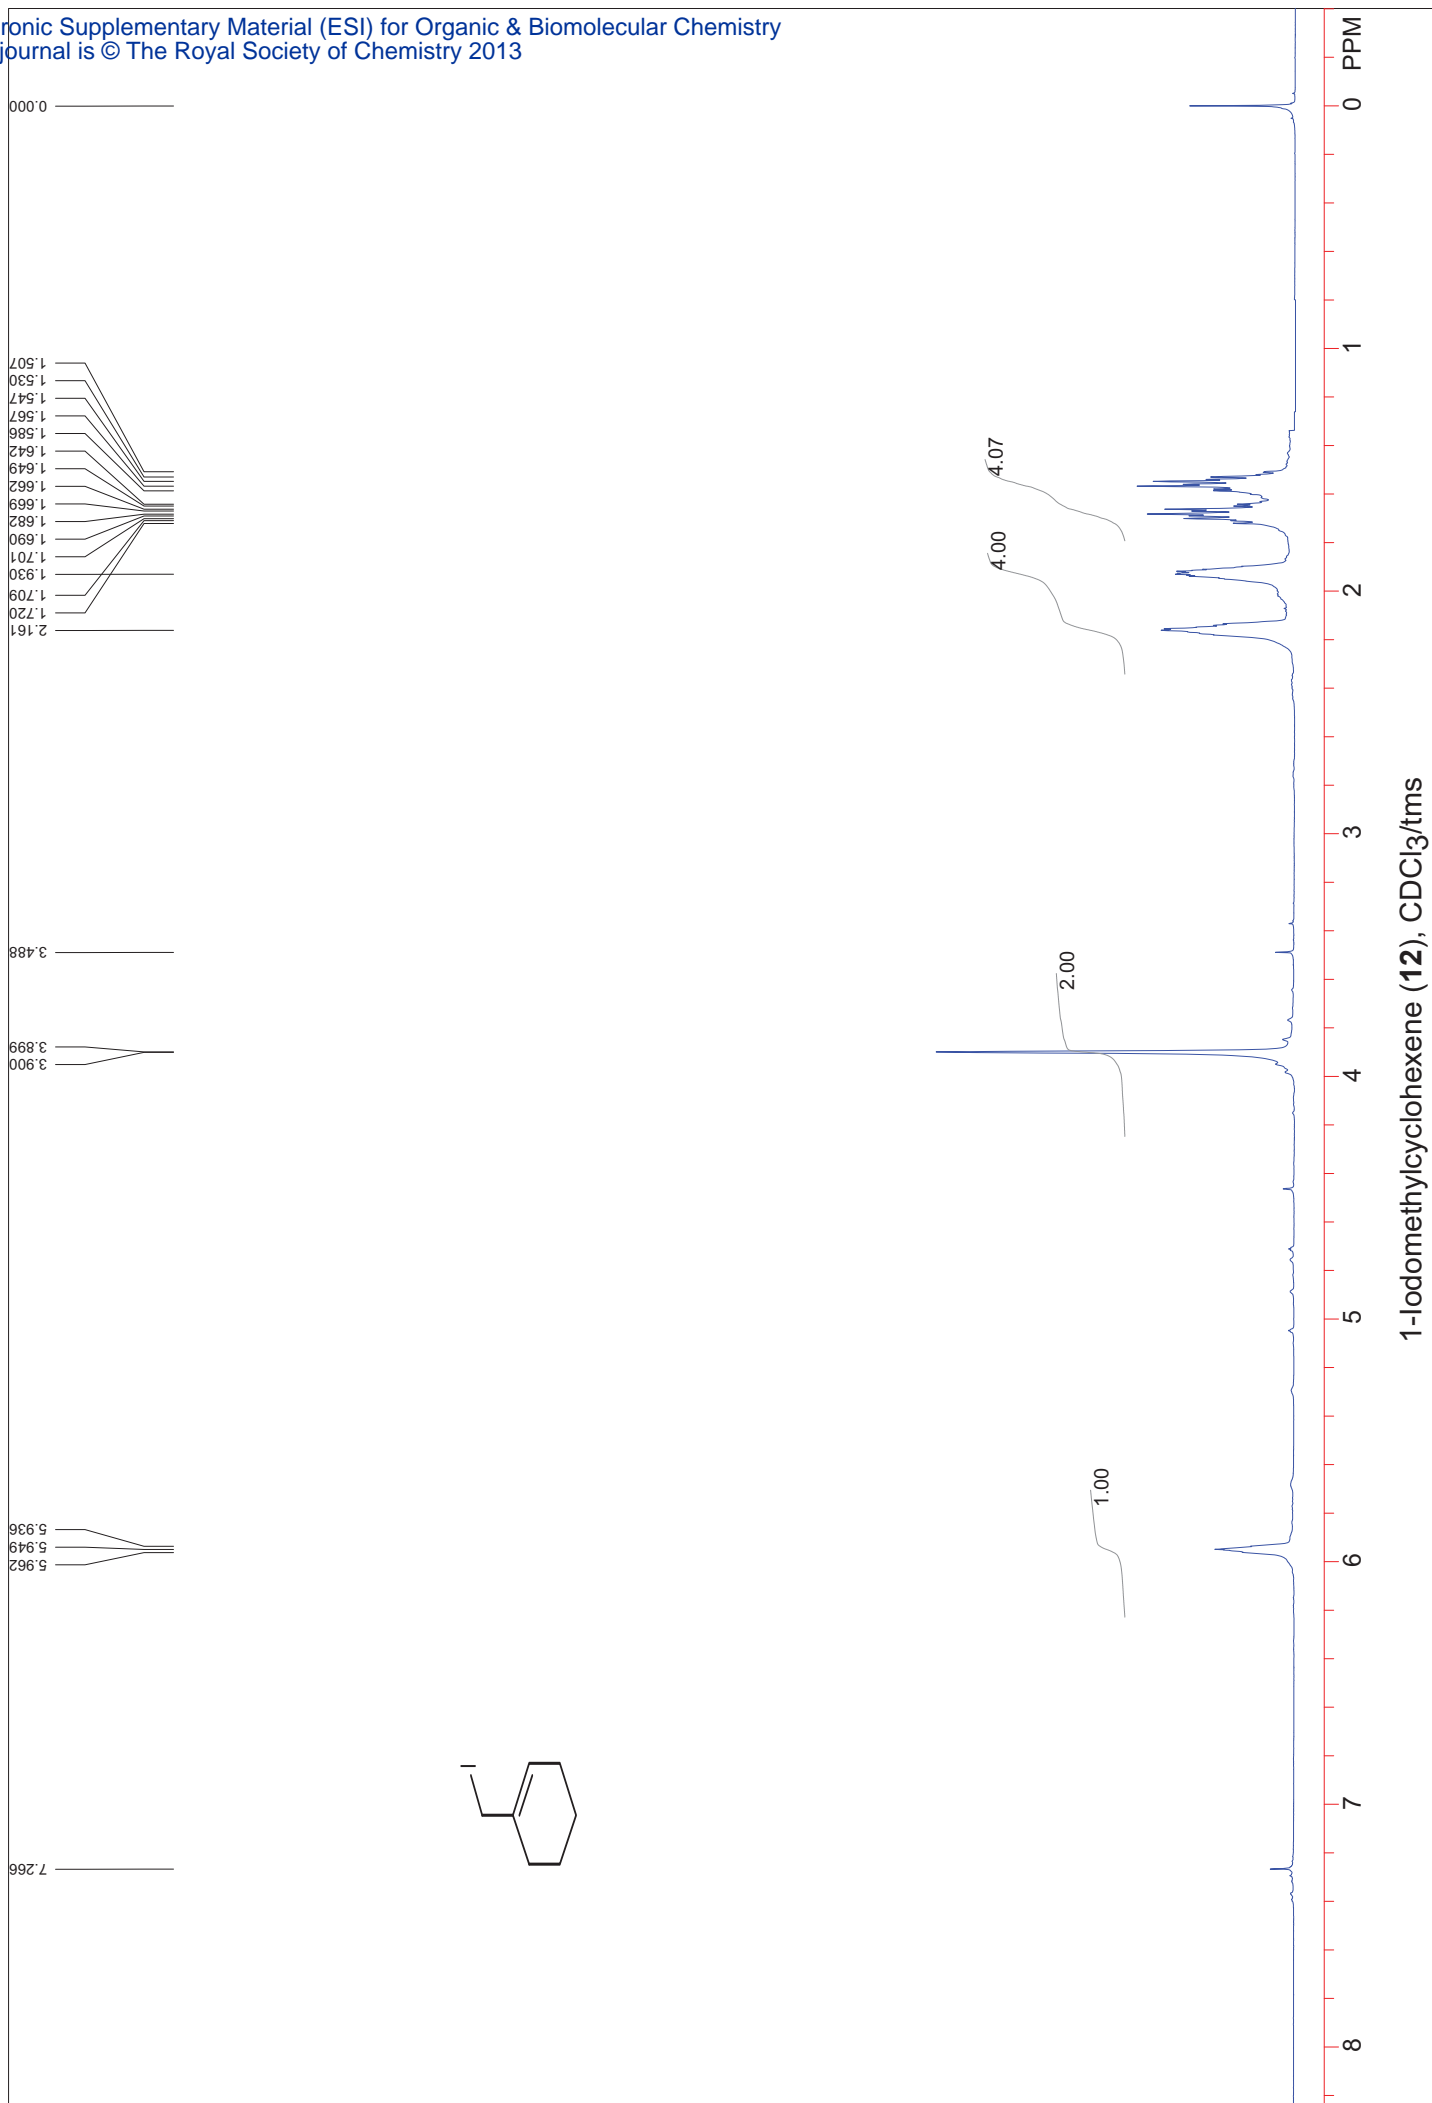

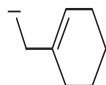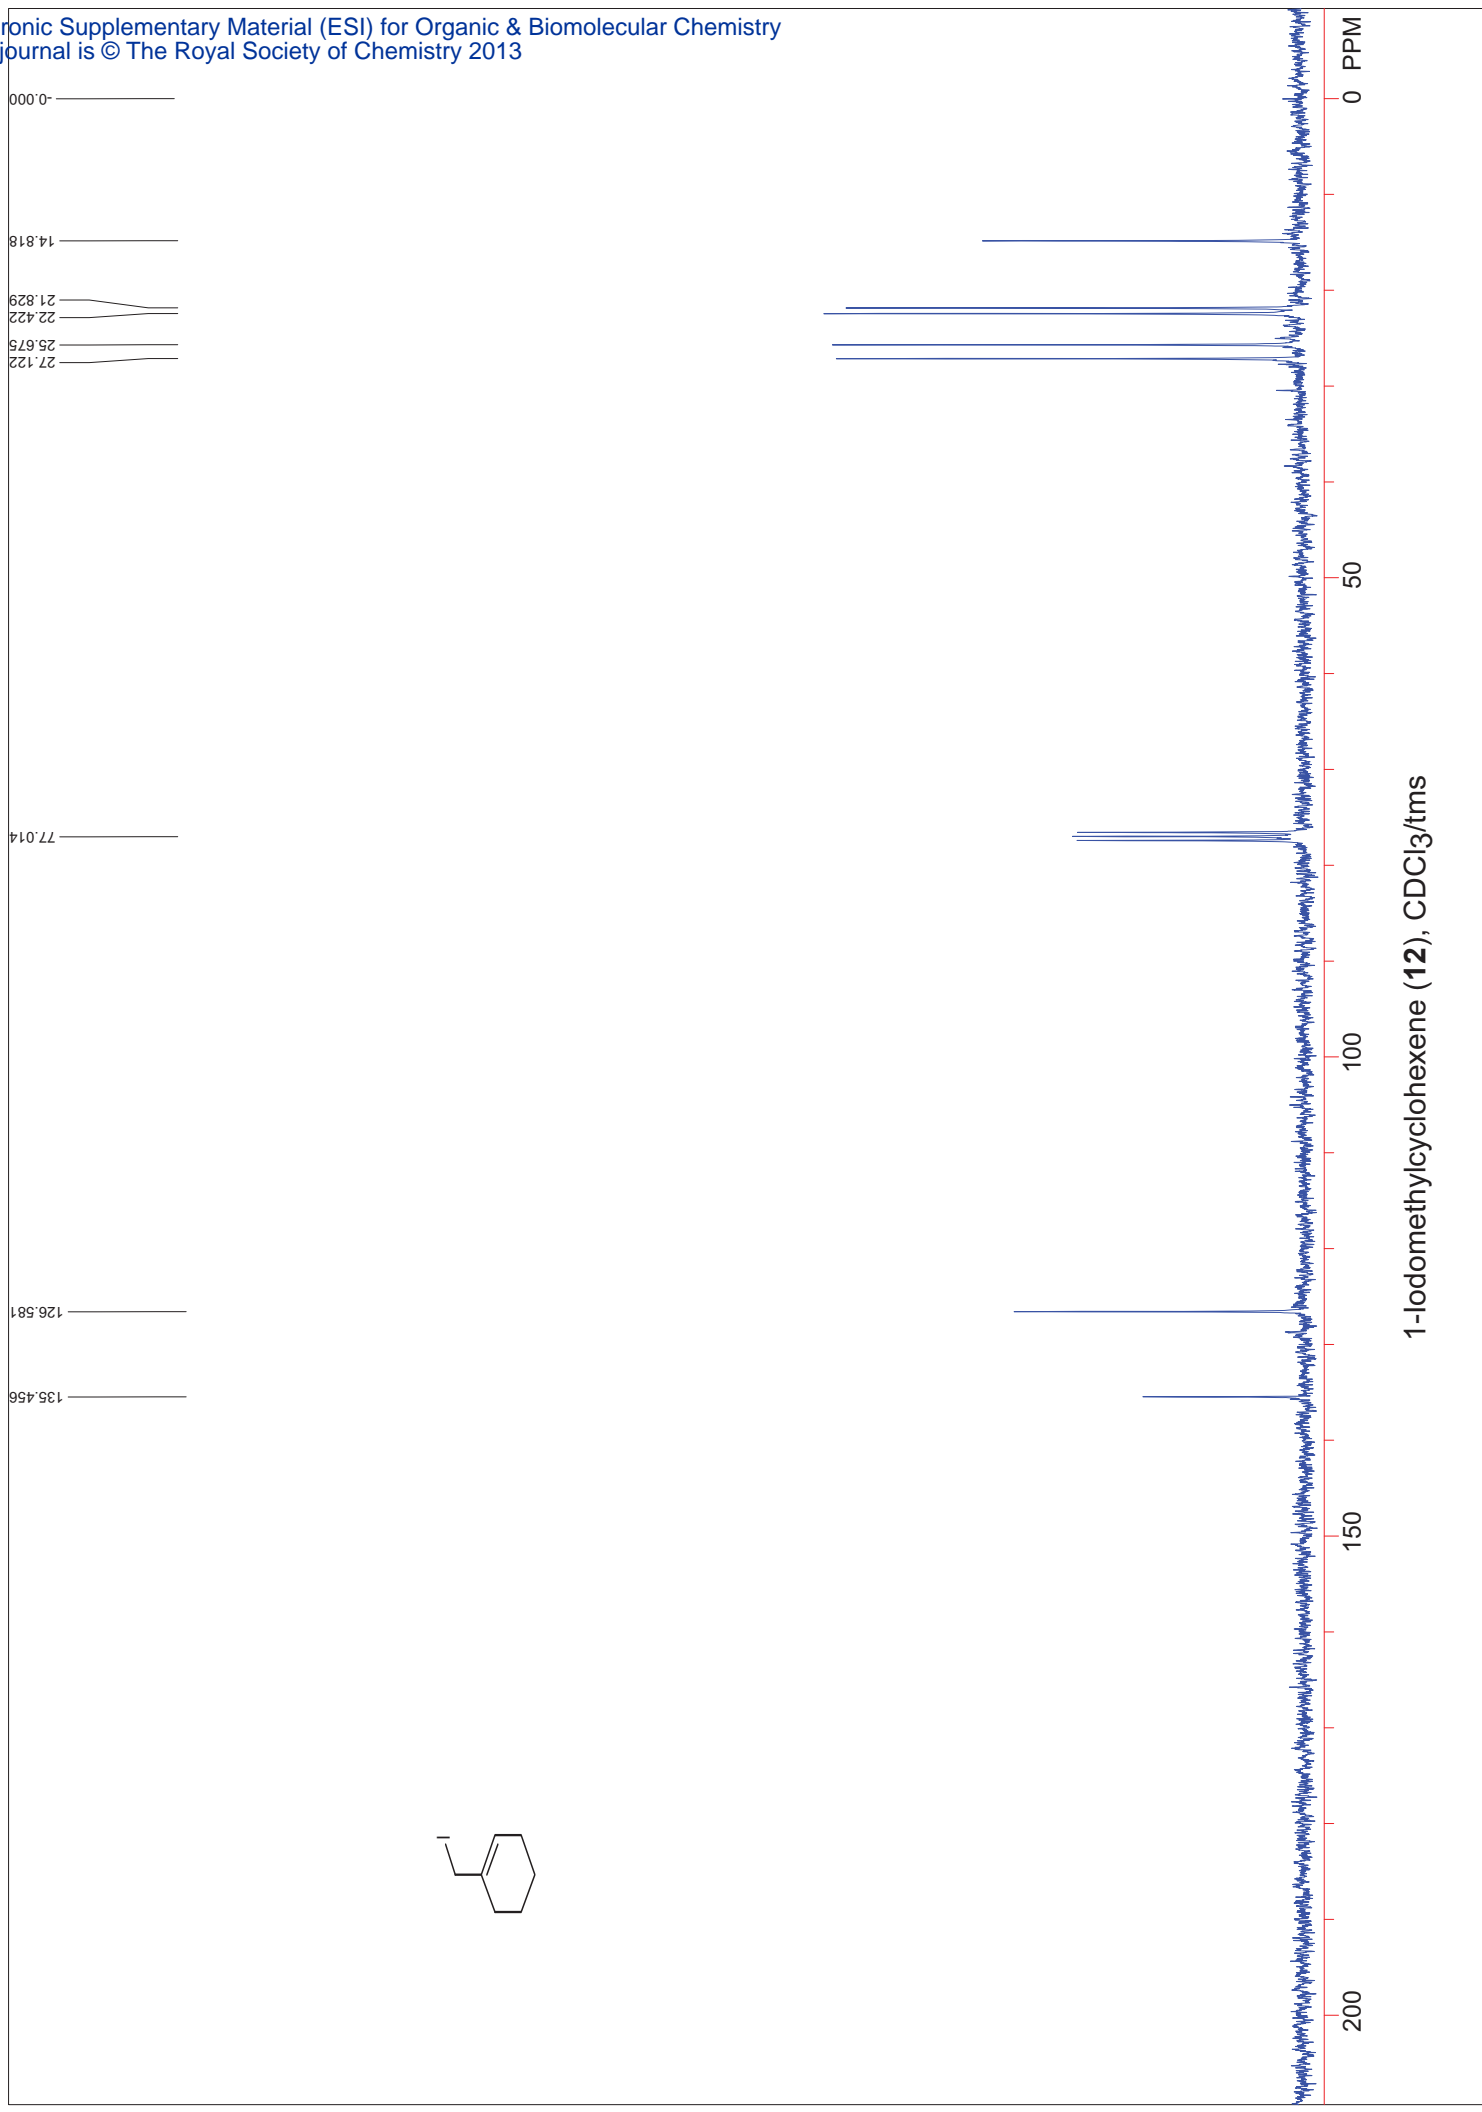



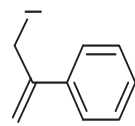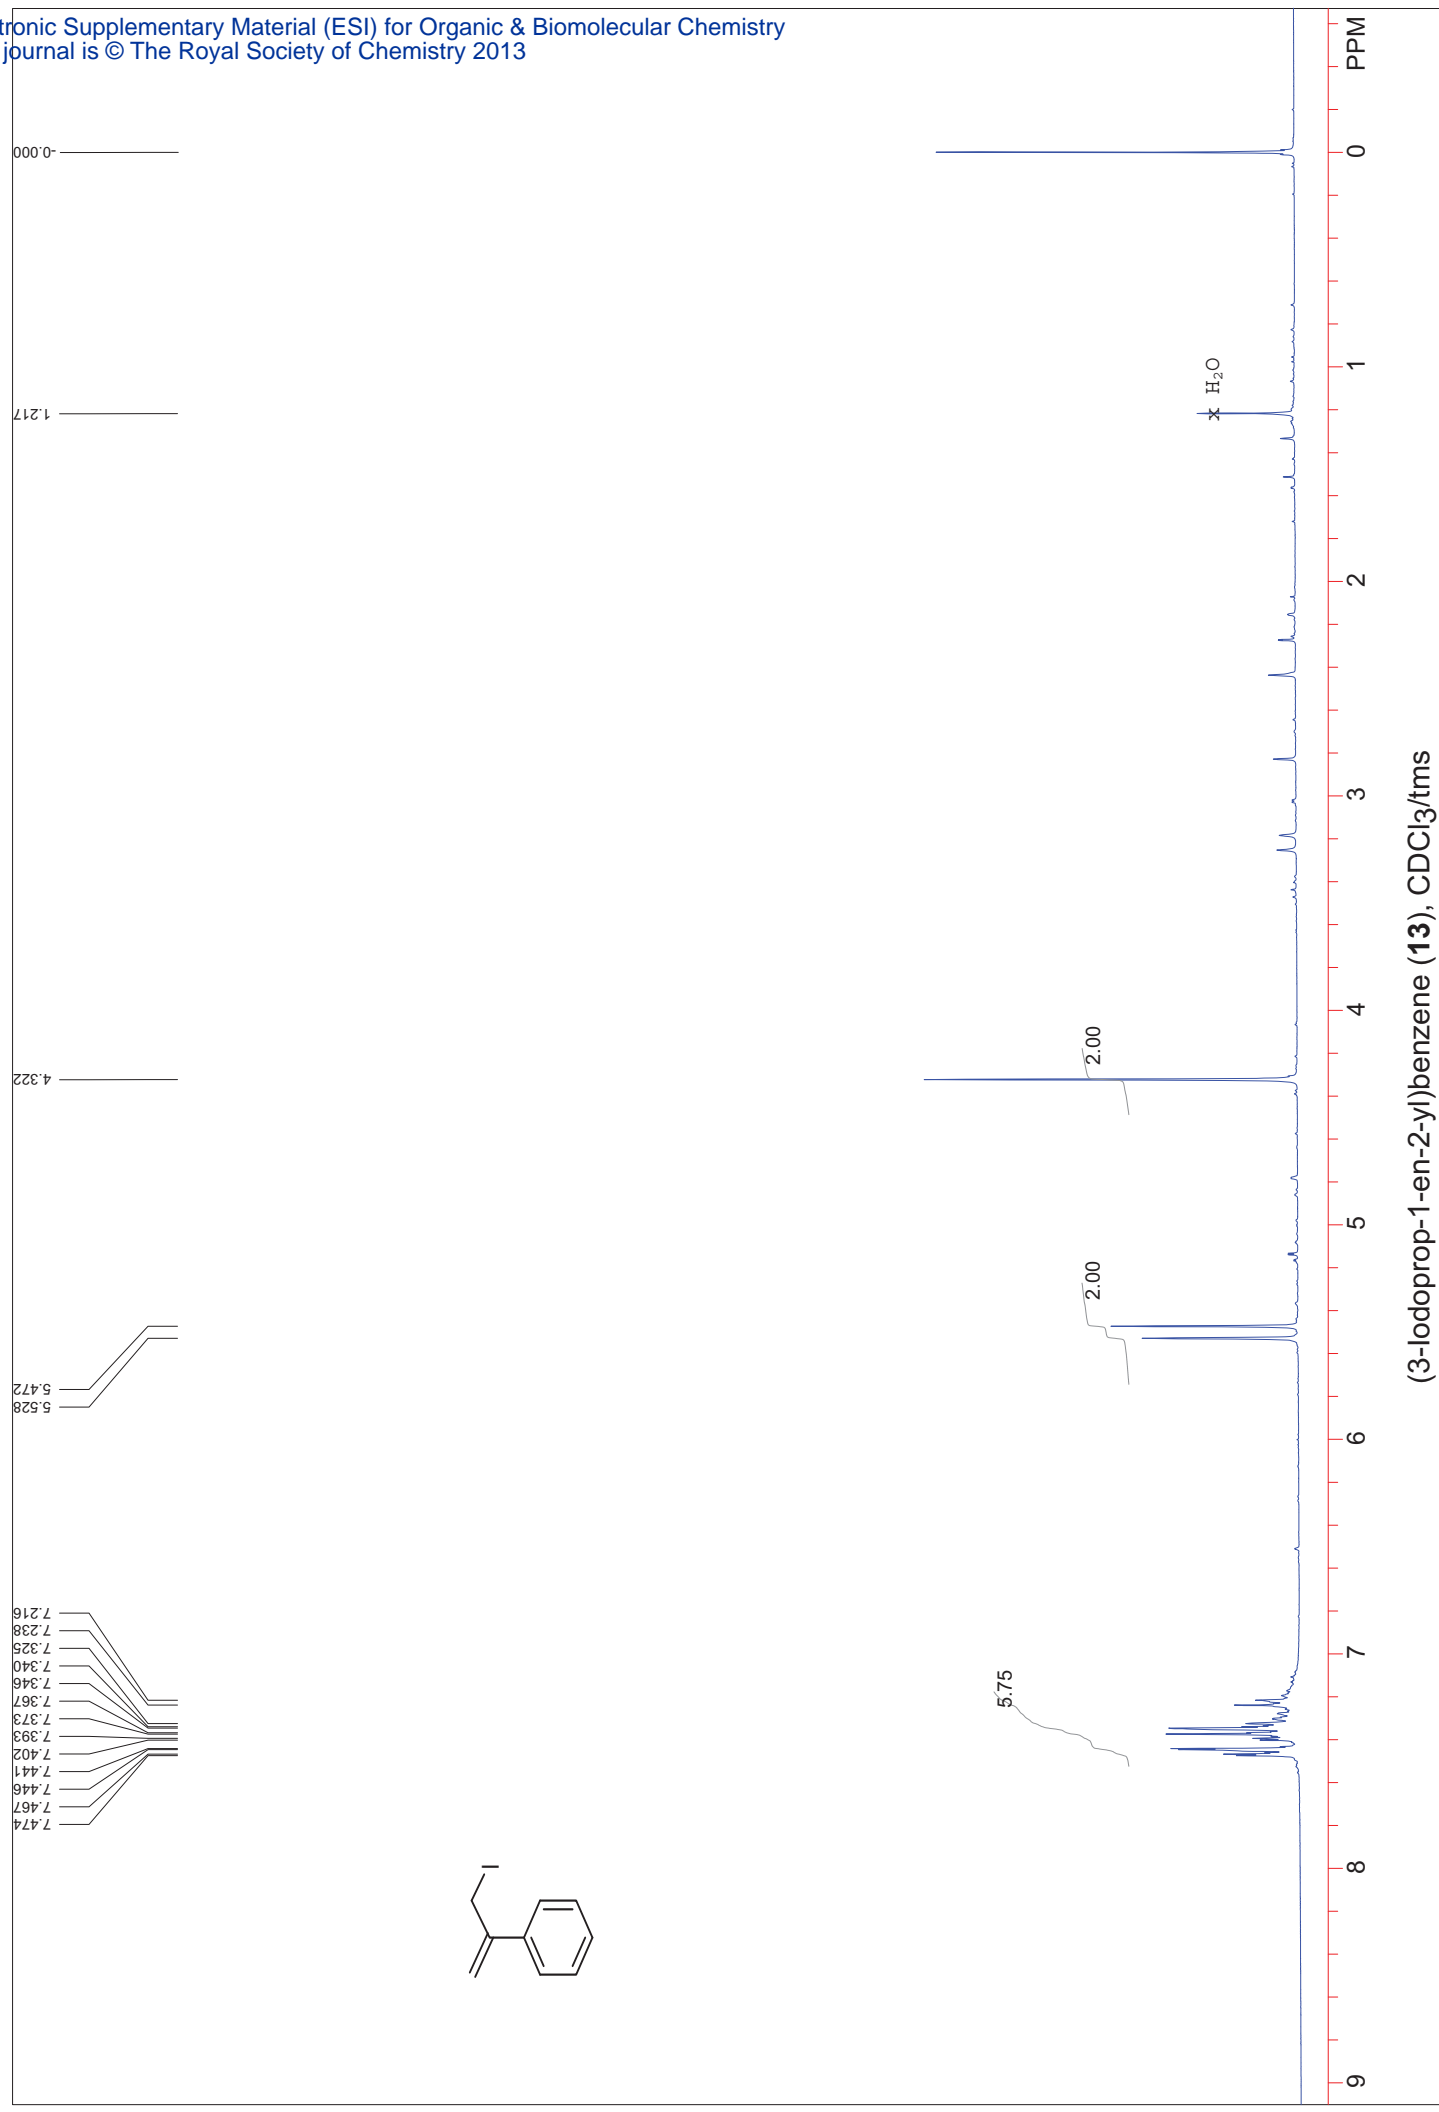

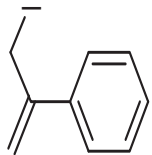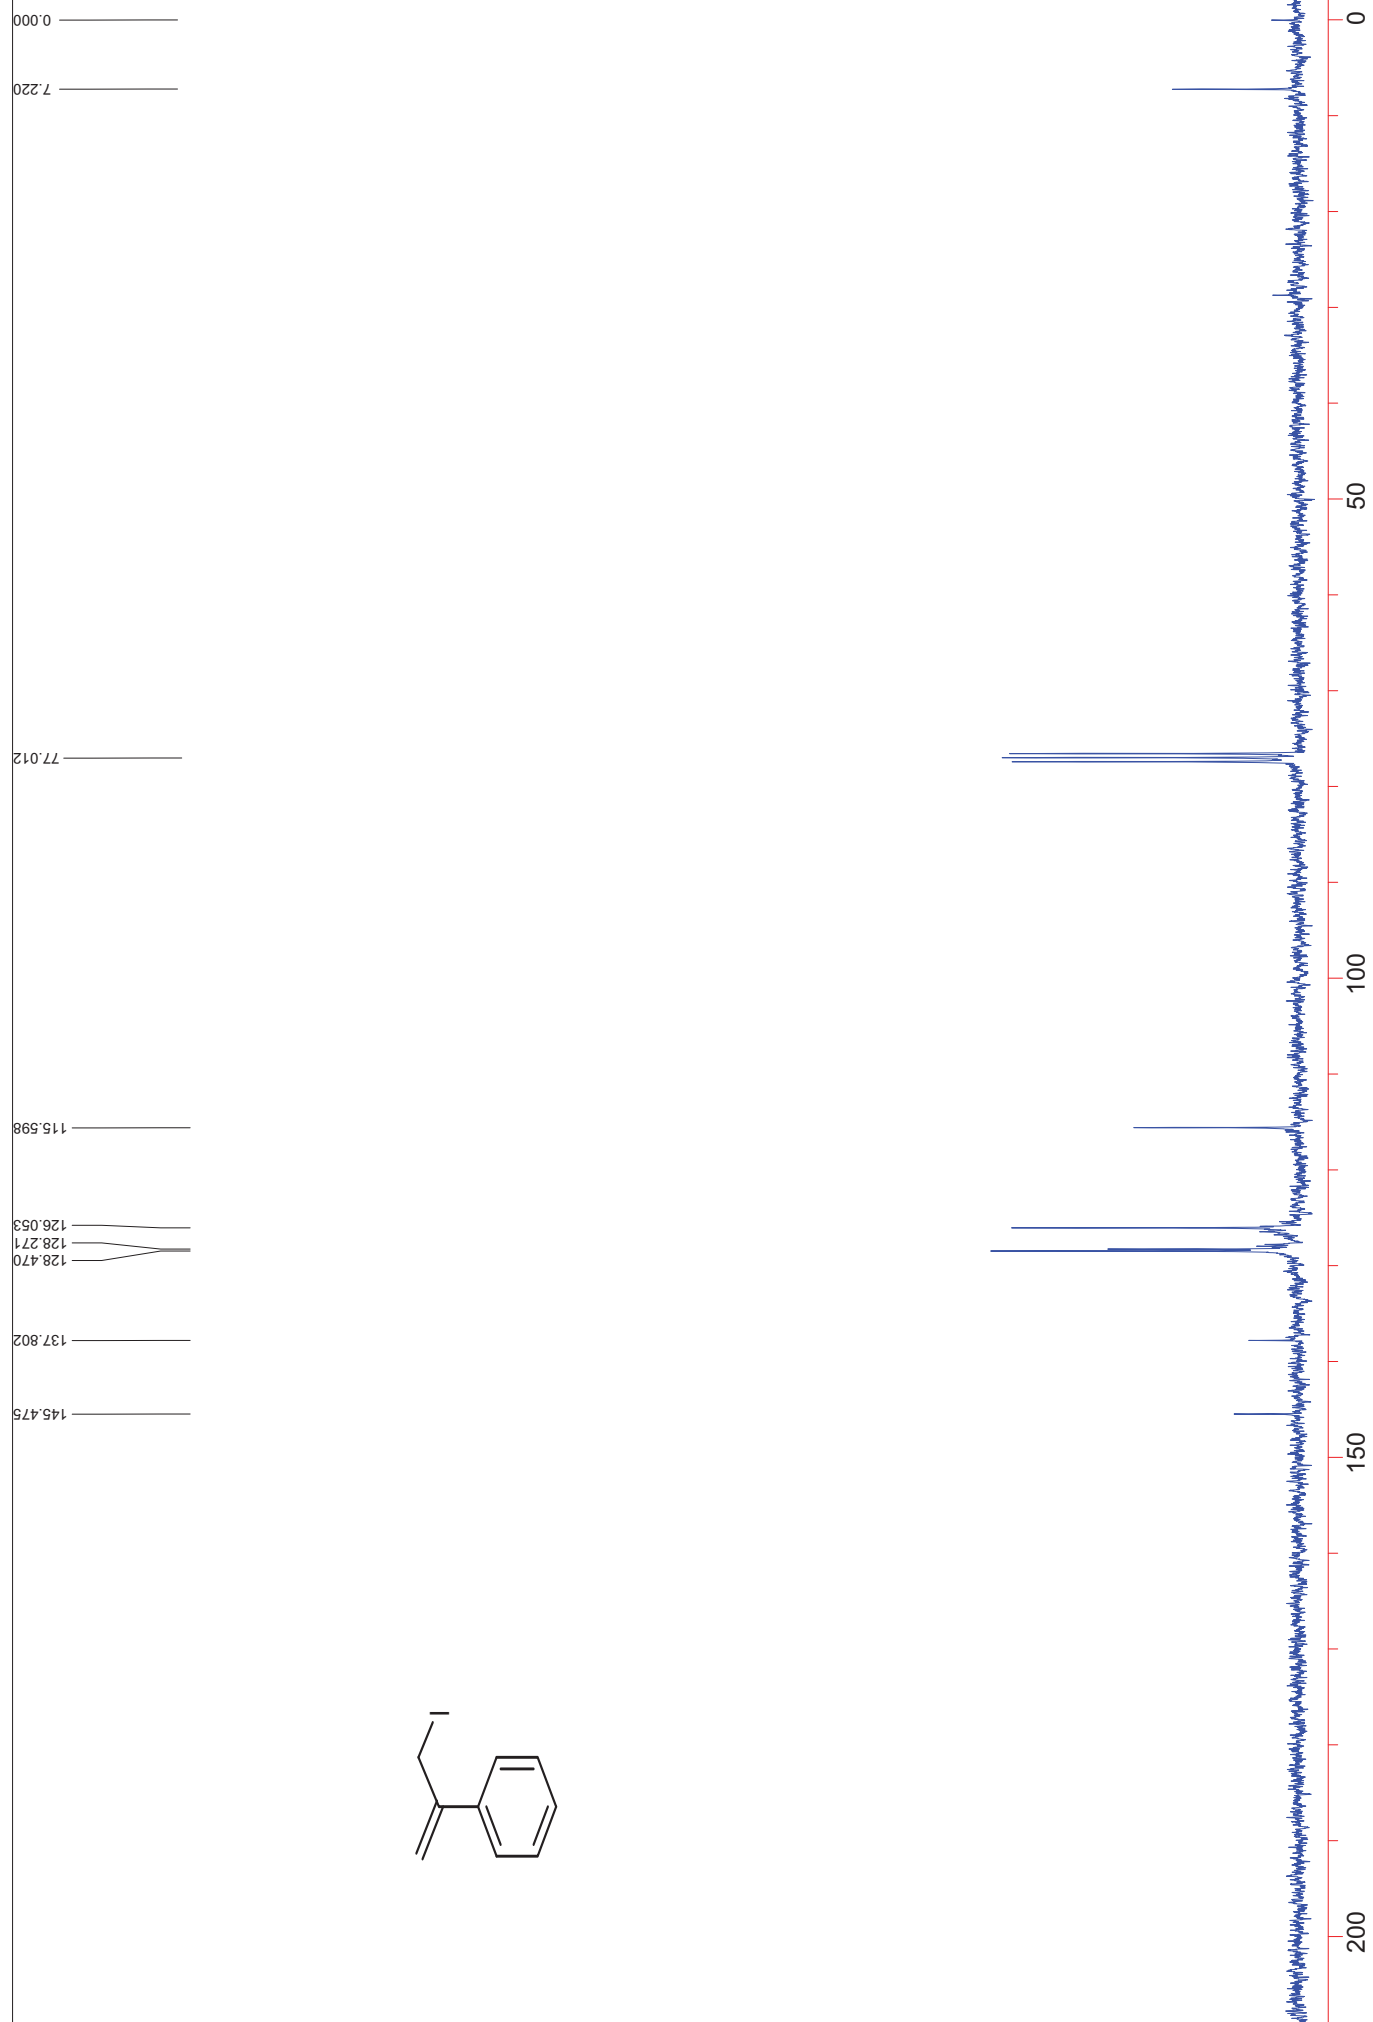

(3-iodoprop-1-en-2-yl)benzene (**13**), CDCl<sub>3</sub>/tms

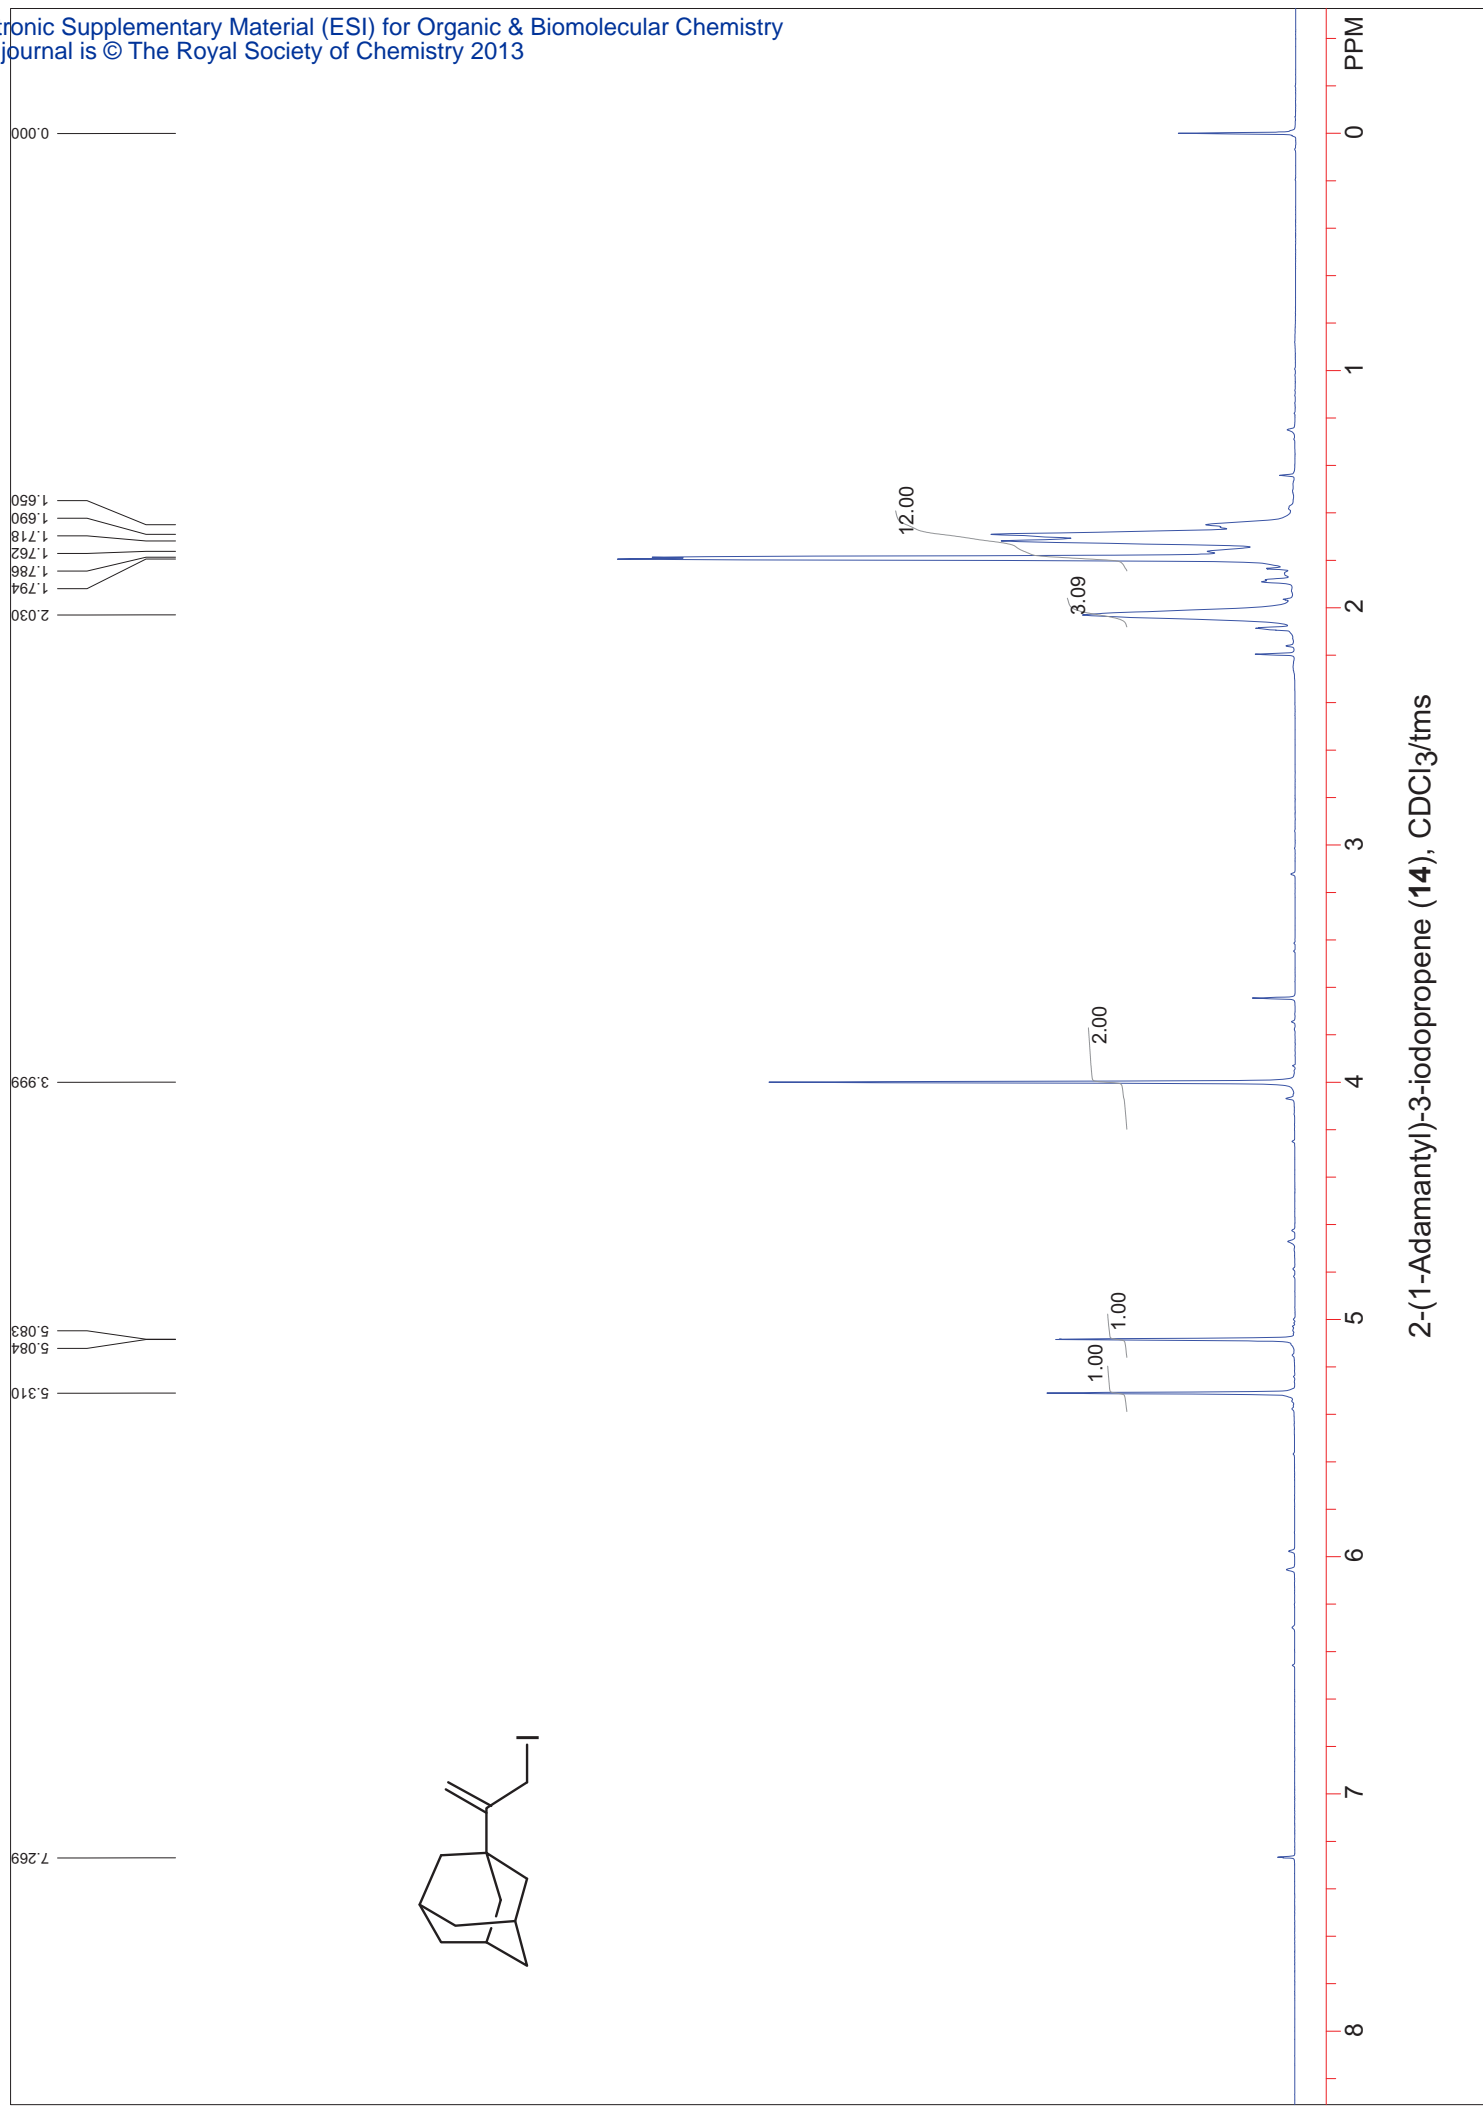

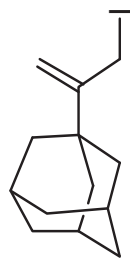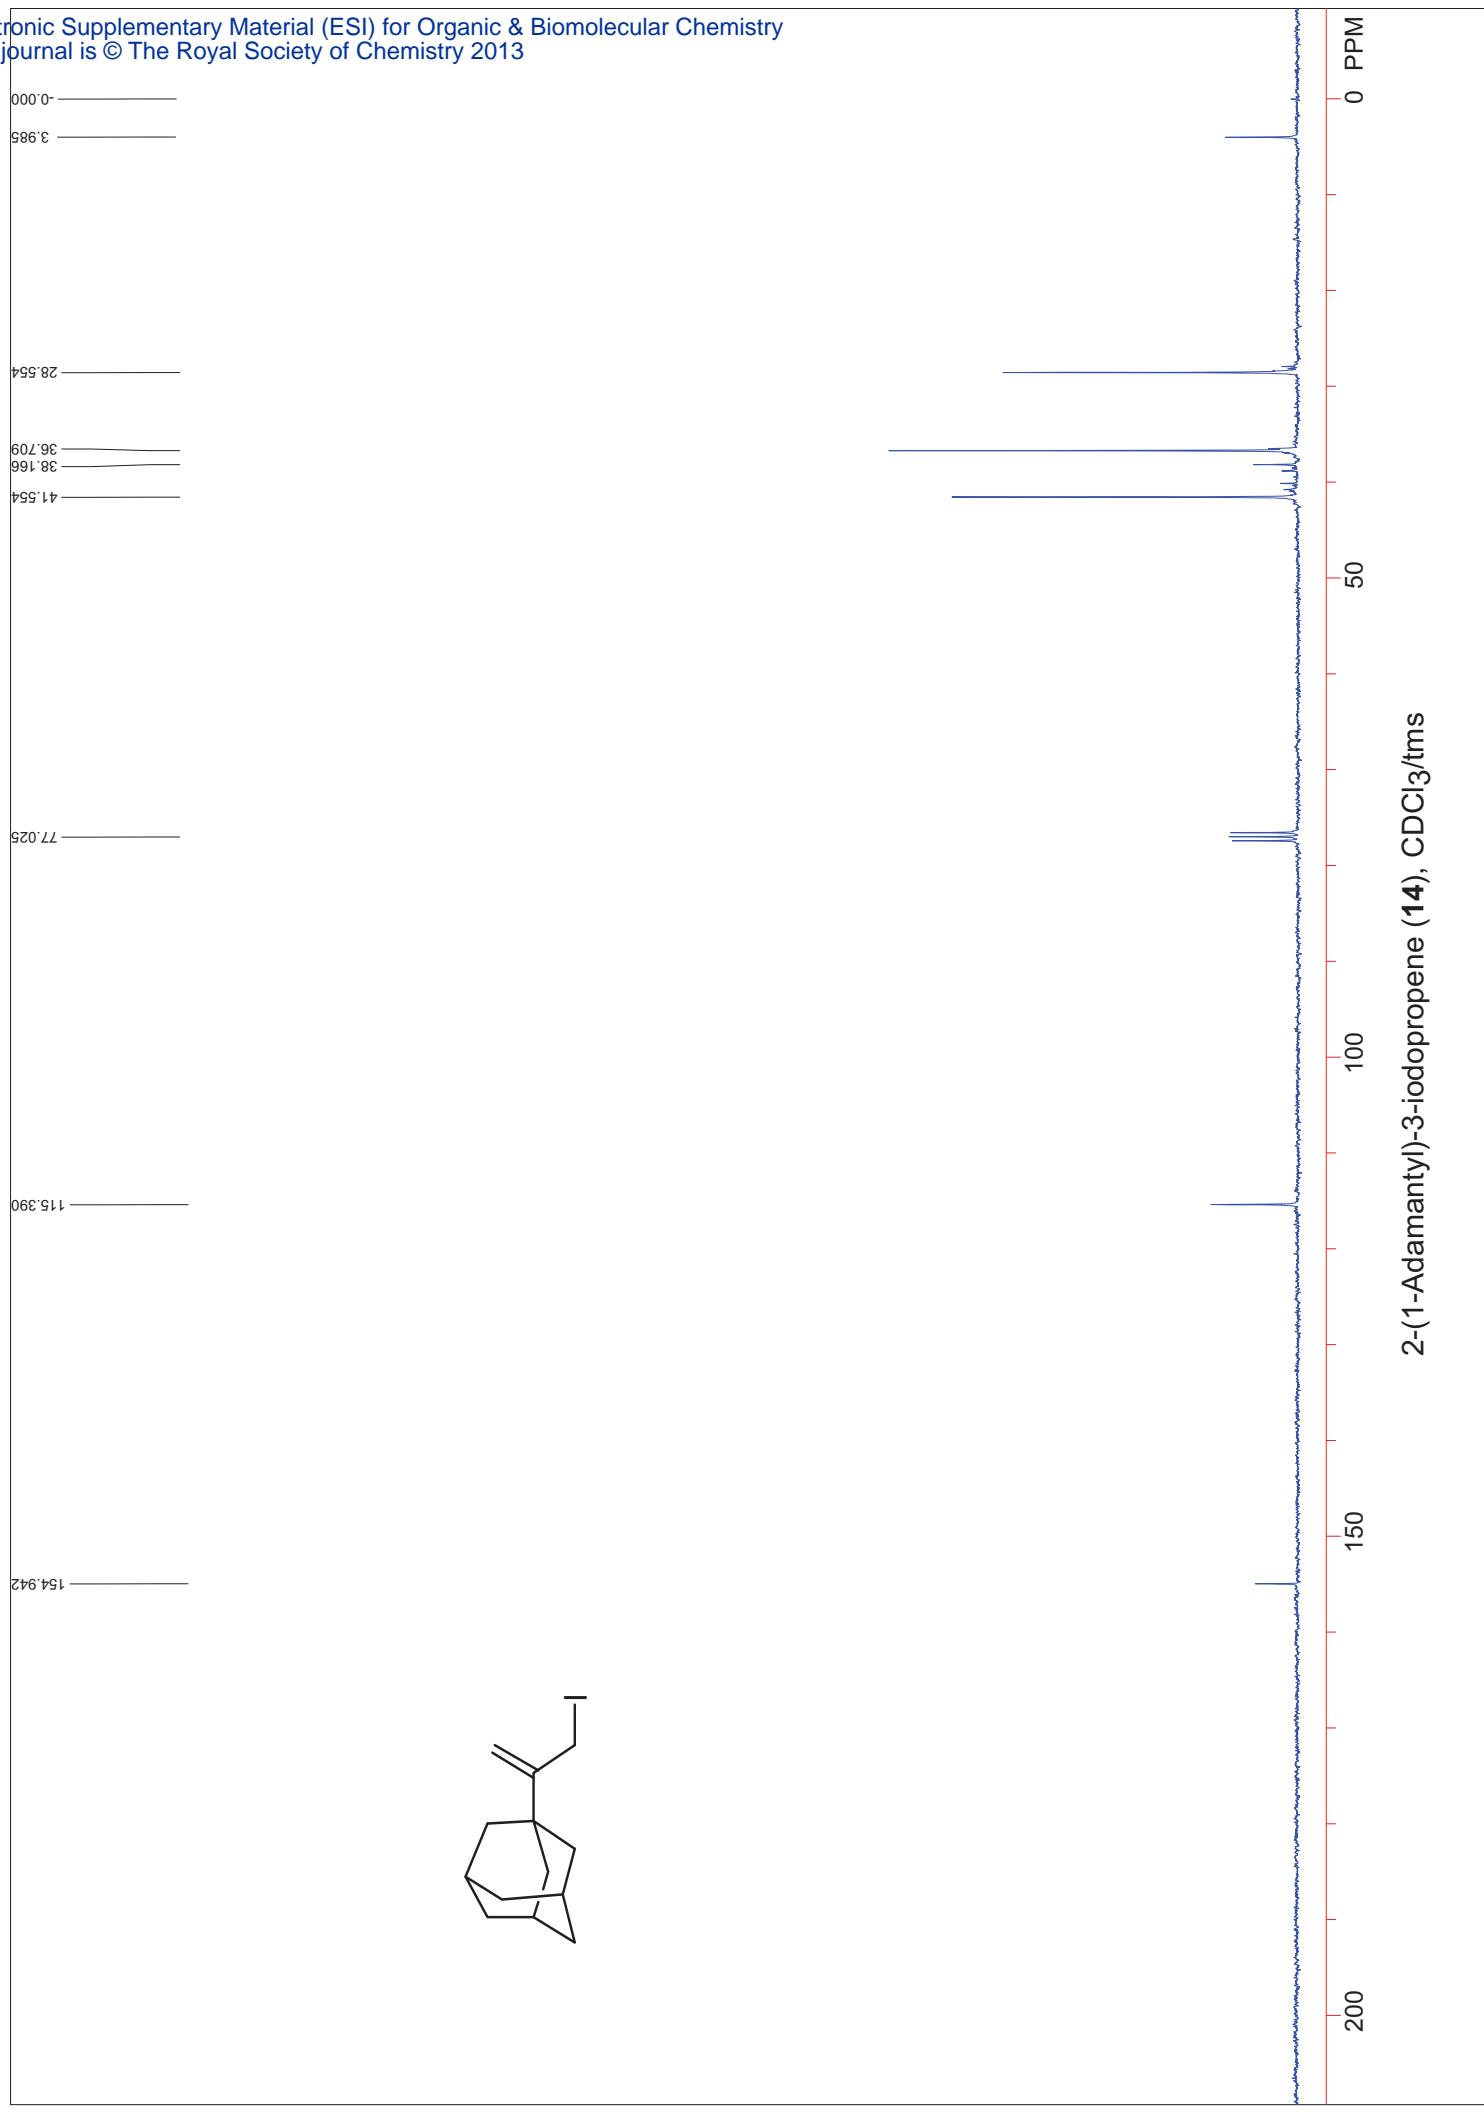

## 2. Kinetic measurement data

### 2.1. Experimental part

<sup>1</sup>H NMR spectra for all samples from kinetic experiments (500 MHz, CDCl<sub>3</sub>) were recorded using Varian 500 with Auto-Tuner. <sup>1</sup>H NMR chemical shifts are referenced to tetramethylsilane as internal standard and reported in parts per million (ppm). *N,N*-Dimethylacetamide 99+% (DMA) was purchased from Acros. Betulin (B) was obtained using previously developed procedures.<sup>1</sup> The other reagents were purchased from Aldrich. The quenching and analyzing technique was used to obtain reagent concentration/time data. The reaction time intervals were chosen for a betulin conversion less than 15% when no inhibition (related to the hydrogen iodide accumulation in the reaction media) was observed (up to 25-90 sec); several sets of experiments (A-G) were performed. Betulin (B) and iodine (I<sub>2</sub>) were dissolved separately in DMA to form solutions containing a precisely known concentration of the reagents for each set of experiments. Determined volumes of the solutions were mixed (1:1, 1:1.2 and 1.2:1 betulin to iodine molar ratios) at a specified temperature (25, 35, 45, 55 and 65 °C) and stirred for a fixed period of time for each experiment. The mixture was immediately treated with aqueous sodium bisulfite solution to neutralize iodine and terminate the reaction. The precipitate was filtered, washed with water and dried. The solid samples from these experiments are mixtures of 30-iodolup-20-en-3β,28-diol (IB) and starting betulin (B). They were dissolved in CDCl<sub>3</sub> and analyzed by <sup>1</sup>H NMR to determine the content of IB in the mixture. This value was used to determine the concentration of betulin (B) and iodine (I<sub>2</sub>) at the moment of reaction termination. Kinetic data was analyzed by the least squares linear regression to find corresponding functional correlations. The reaction order, rate constants, activation energy E<sub>A</sub>, enthalpy ΔH<sup>‡</sup><sub>298</sub>, entropy ΔS<sup>‡</sup><sub>298</sub> and Gibbs free energy ΔG<sup>‡</sup><sub>298</sub> were calculated using standard kinetic and thermodynamic equations.

#### 2.1.1. Experiments A

Betulin (B) (Scheme 1) (0.6226 g) was dissolved in DMA in a volumetric flask (25 ml total volume). Iodine (I<sub>2</sub>) crystals (0.5711 g) were dissolved in DMA in a volumetric flask (10 ml total volume). The reaction vessels were filled with the betulin solution (2 ml each, volumetric pipette). The sample of betulin solution was stirred at 25±0.1 °C. The iodine solution (0.5 ml, volumetric pipette) was added and reaction mixture was intensively stirred at 25±0.1 °C for a fixed period of time (Table 1). The mixture was immediately treated with aqueous sodium bisulfite solution (5 ml) (3.3 g sodium bisulfite in 200 ml of the solution). The white suspensions were left for 1 hr at room temperature. Each precipitate was filtered, washed with water (5x10 ml) and dried to give a set of A samples for <sup>1</sup>H NMR analysis (Table 1).

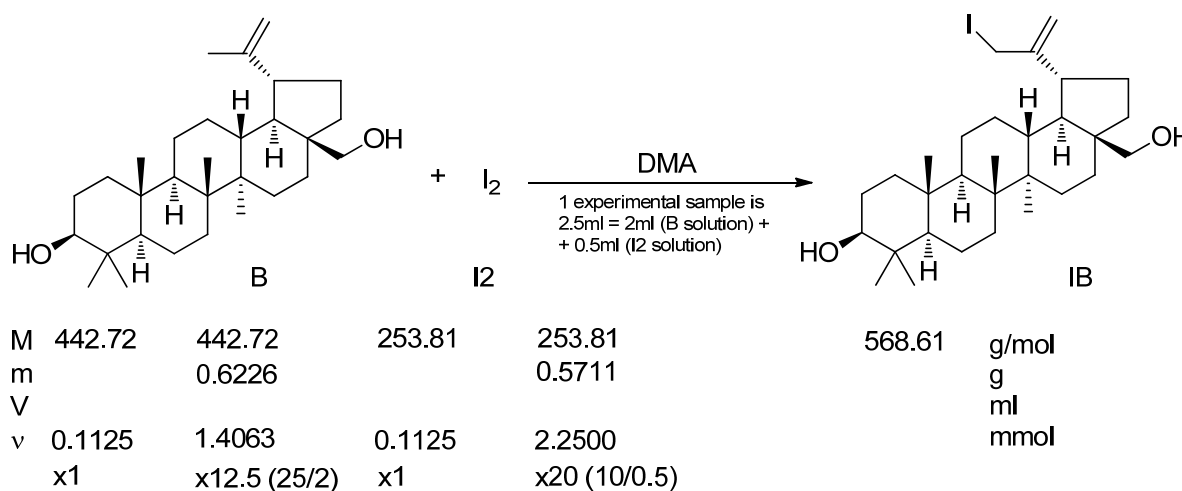

Scheme 1 Experiments A and D-G, calculated reagent ratio

<sup>1</sup> US Pat. 6815553, 2004.

### 2.1.2. Experiments B

The reaction conditions are identical to the experiments A, except the concentration of iodine is 1.2 times higher (Scheme 2).

Betulin (B) (0.6226 g) was dissolved in DMA in a volumetric flask (25 ml total volume). Iodine (I<sub>2</sub>) crystals (0.6853 g) were dissolved in DMA in a volumetric flask (10 ml total volume). The reaction vessels were filled with the betulin solution (2 ml each, volumetric pipette). The sample of betulin solution was stirred at 25±0.1 °C. The iodine solution (0.5 ml, volumetric pipette) was added and reaction mixture was intensively stirred at 25±0.1 °C for a fixed period of time (Table 2). The mixture was immediately treated with aqueous sodium bisulfite solution (5 ml) (3.3 g sodium bisulfite in 200 ml of the solution). The white suspensions were left for 1 hr at room temperature. Each precipitate was filtered, washed with water (5x10 ml) and dried to give a set of B samples for <sup>1</sup>H NMR analysis (Table 2).

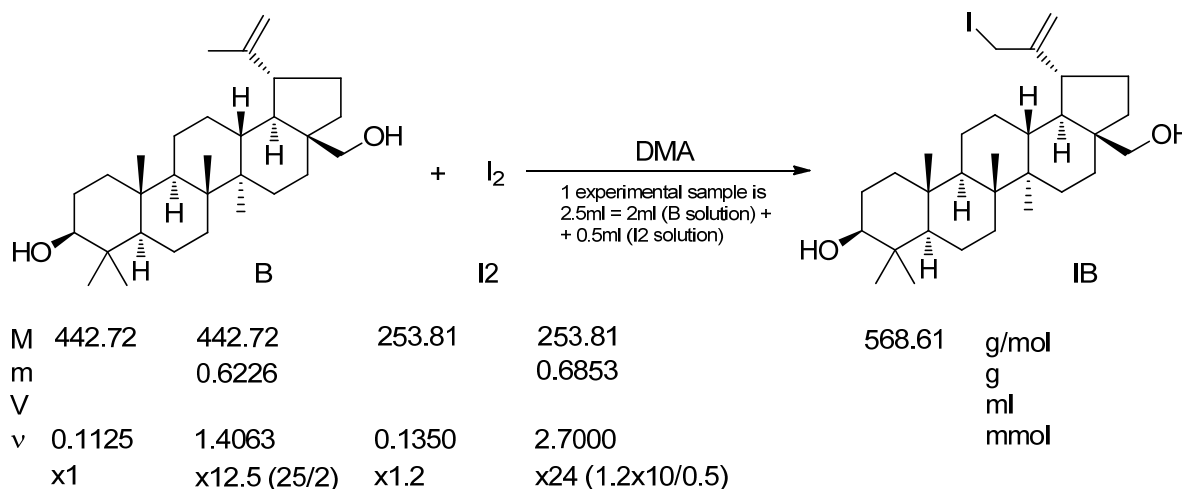

Scheme 2 Experiments B, calculated reagent ratio

### 2.1.3. Experiments C

The reaction conditions are identical to the experiments A, except the concentration of betulin is 1.2 times higher (Scheme 3).

Betulin (B) (0.7471 g) was dissolved in DMA in a volumetric flask (25 ml total volume). Iodine (I<sub>2</sub>) crystals (0.5710 g) were dissolved in DMA in a volumetric flask (10 ml total volume). The reaction vessels were filled with the betulin solution (2 ml each, volumetric pipette). The sample of the betulin solution was stirred at 25±0.1 °C. The iodine solution (0.5 ml, volumetric pipette) was added and reaction mixture was intensively stirred at 25±0.1 °C for a fixed period of time (Table 3). The mixture was immediately treated with aqueous sodium bisulfite solution (5 ml) (3.3 g sodium bisulfite in 200 ml of the solution). The white suspensions were left for 1 hr at room temperature. Each precipitate was filtered, washed with water (5x10 ml) and dried to give a set of C samples for <sup>1</sup>H NMR analysis (Table 3).

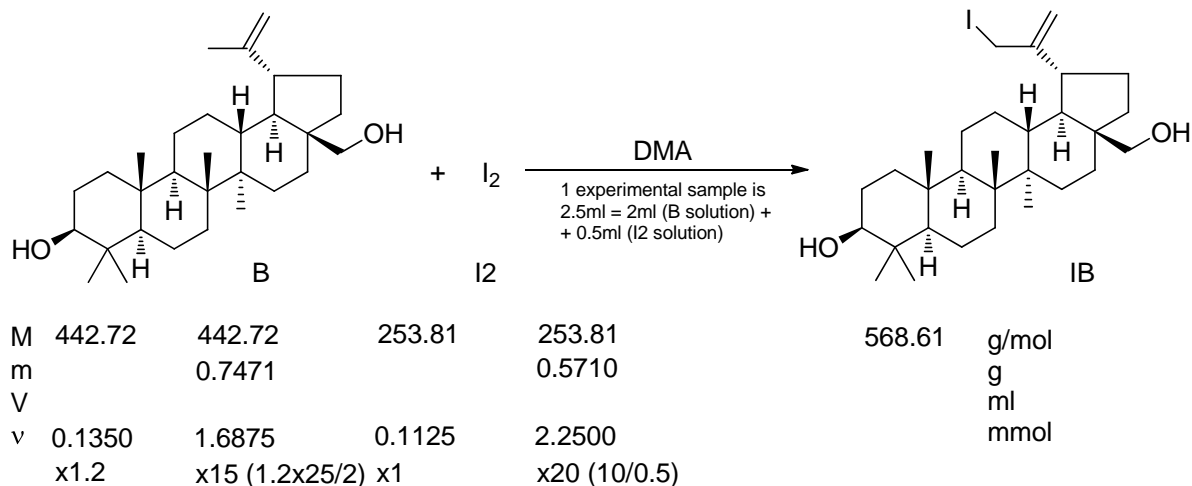

**Scheme 3** Experiments C, calculated reagent ratio

#### 2.1.4. Experiments D

The reaction conditions are identical to the experiments A (Scheme 1), except the reaction temperature is 35 °C.

Betulin (B) (0.6226 g) was dissolved in DMA in a volumetric flask (25 ml total volume). Iodine (I<sub>2</sub>) crystals (0.5711 g) were dissolved in DMA in a volumetric flask (10 ml total volume). The reaction vessels were filled with the betulin solution (2 ml each, volumetric pipette). The smaller vessel (thin glass) was filled with the iodine solution (0.5 ml, volumetric pipette) and immersed into the betulin solution in the reaction vessel (the solutions did not mix). The system was thermostabilized at 35±0.1 °C. Then the smaller vessel was broken (to start the reaction) and reaction mixture was intensively stirred at 35±0.1 °C for a fixed period of time (Table 4). The mixture was immediately treated with aqueous sodium bisulfite solution (5 ml) (3.3 g sodium bisulfite in 200 ml of the solution). The white suspensions were left for 1 hr at room temperature. Each precipitate was filtered, washed with water (5x10 ml) and dried to give a set of **D** samples for <sup>1</sup>H NMR analysis (Table 4).

#### 2.1.5. Experiments E

The reaction conditions are identical to the experiments A (Scheme 1), except the reaction temperature is 45 °C.

Betulin (B) (0.6226 g) was dissolved in DMA in a volumetric flask (25 ml total volume). Iodine (I<sub>2</sub>) crystals (0.5711 g) were dissolved in DMA in a volumetric flask (10 ml total volume). The reaction vessels were filled with the betulin solution (2 ml each, volumetric pipette). The smaller vessel (thin glass) was filled with the iodine solution (0.5 ml, volumetric pipette) and immersed into the betulin solution in the reaction vessel (the solutions did not mix). The system was thermostabilized at 45±0.1 °C. Then the smaller vessel was broken (to start the reaction) and reaction mixture was intensively stirred at 45±0.1 °C for a fixed period of time (Table 5). The mixture was immediately treated with aqueous sodium bisulfite solution (5 ml) (3.3 g sodium bisulfite in 200 ml of the solution). The white suspensions were left for 1 hr at room temperature. Each precipitate was filtered, washed with water (5x10 ml) and dried to give a set of **E** samples for <sup>1</sup>H NMR analysis (Table 5).

#### 2.1.6. Experiments F

The reaction conditions are identical to the experiments A (Scheme 1), except the reaction temperature is 55 °C.

Betulin (B) (0.6226 g) was dissolved in DMA in a volumetric flask (25 ml total volume). Iodine (I<sub>2</sub>) crystals (0.5711 g) were dissolved in DMA in a volumetric flask (10 ml total volume). The reaction vessels were filled with the betulin solution (2 ml each, volumetric pipette). The smaller vessel (thin glass) was filled with the iodine solution (0.5 ml, volumetric pipette) and immersed into the betulin solution in the reaction vessel (the solutions did not mix). The system was thermostabilized at 55±0.1 °C. Then the smaller vessel was broken (to start the reaction) and reaction mixture was intensively stirred at 55±0.1 °C for a fixed period of time (Table 6). The mixture was

immediately treated with aqueous sodium bisulfite solution (5 ml) (3.3 g sodium bisulfite in 200 ml of the solution). The white suspensions were left for 1 hr at room temperature. Each precipitate was filtered, washed with water (5x10 ml) and dried to give a set of **F** samples for <sup>1</sup>H NMR analysis (Table 6).

### 2.1.7. Experiments G

The reaction conditions are identical to the experiments **A** (Scheme 1), except the reaction temperature is 65 °C.

Betulin (**B**) (0.6226 g) was dissolved in DMA in a volumetric flask (25 ml total volume). Iodine (**I2**) crystals (0.5711 g) were dissolved in DMA in a volumetric flask (10 ml total volume). The reaction vessels were filled with the betulin solution (2 ml each, volumetric pipette). The smaller vessel (thin glass) was filled with the iodine solution (0.5 ml, volumetric pipette) and immersed into the betulin solution in the reaction vessel (the solutions did not mix). The system was thermostabilized at 65±0.1 °C. Then the smaller vessel was broken (to start the reaction) and reaction mixture was intensively stirred at 65±0.1 °C for a fixed period of time (Table 7). The mixture was immediately treated with aqueous sodium bisulfite solution (5 ml) (3.3 g sodium bisulfite in 200 ml of the solution). The white suspensions were left for 1 hr at room temperature. Each precipitate was filtered, washed with water (5x10 ml) and dried to give a set of **G** samples for <sup>1</sup>H NMR analysis (Table 7).

## 2.2. Kinetic parameters of the iodination reaction

The data from experiments **A**, **B** and **C** was used. **A**, **B** and **C** samples are the mixtures of 30-iodolup-20-en-3β,28-diol (**IB**) product and starting betulin (**B**) (Schemes 1-3). They were analyzed by <sup>1</sup>H NMR to determine the content of **IB** (mol%) in the mixture. It could be determined as a ratio of total integral intensity of **IB** 29-CH<sub>2</sub> signals (5.17 ppm (s) and 5.00 ppm (s)) to total integral intensity of **IB** 29-CH<sub>2</sub> and **B** 29-CH<sub>2</sub> (4.68 ppm (s) and 4.58 ppm (s)) signals. This value was used to determine the current (at the moment of reaction termination with sodium bisulfite) concentration (mmol/l) of betulin ( $[B]$ ) and iodine ( $[I2]$ ):  $[B] = B_0 - B_0 \frac{IB\%}{100}$  and  $[I2] = I2_0 - I2_0 \frac{IB\%}{100}$ , where  $IB\%$  is the content of **IB** (mol%) in the reaction sample,  $B_0$  and  $I2_0$  are starting concentrations of betulin and iodine (mmol/l) respectively (Tables 1-3).

**Table 1** Experiments **A** data (25 °C)

| <b>A</b> sample # | Time $t$ , sec | $IB\%$ , mol%,<br><sup>1</sup> H NMR | $[B] = [I2]$ , mmol/l | $\frac{1}{[I2]}$ , l/mol |
|-------------------|----------------|--------------------------------------|-----------------------|--------------------------|
| 0                 | 0.00           | 0.0                                  | 45.000                | 22.22222                 |
| 1                 | 12.21          | 2.7                                  | 43.785                | 22.83887                 |
| 2                 | 20.28          | 3.9                                  | 43.245                | 23.12406                 |
| 3                 | 30.07          | 5.9                                  | 42.345                | 23.61554                 |
| 4                 | 40.32          | 7.7                                  | 41.535                | 24.07608                 |
| 5                 | 50.11          | 8.8                                  | 41.040                | 24.36647                 |
| 6                 | 60.06          | 9.8                                  | 40.590                | 24.63661                 |
| 7                 | 70.23          | 10.9                                 | 40.095                | 24.94077                 |
| 8                 | 80.33          | 12.3                                 | 39.465                | 25.33891                 |
| 9                 | 90.00          | 13.1                                 | 39.105                | 25.57218                 |



**Table 2** Experiments B data (25 °C)

| B sample # | Time $t$ , sec | IB%, mol%,<br><sup>1</sup> H NMR | [B], mmol/l | [I <sub>2</sub> ], mmol/l | $\frac{1}{(I_{20}-B_0)} \ln \frac{B_0 \cdot [I_2]}{I_{20} \cdot [B]}$ l/mol |
|------------|----------------|----------------------------------|-------------|---------------------------|-----------------------------------------------------------------------------|
| 0          | 0.00           | 0.0                              | 45.000      | 54.000                    | 0.000000                                                                    |
| 1          | 12.65          | 3.3                              | 43.515      | 52.515                    | 0.630176                                                                    |
| 2          | 21.09          | 4.5                              | 42.975      | 51.975                    | 0.869192                                                                    |
| 3          | 30.25          | 7.2                              | 41.760      | 50.760                    | 1.427571                                                                    |
| 4          | 41.17          | 8.8                              | 41.040      | 50.040                    | 1.772659                                                                    |
| 5          | 49.81          | 10.6                             | 40.230      | 49.230                    | 2.174295                                                                    |
| 6          | 61.44          | 12.5                             | 39.375      | 48.375                    | 2.614500                                                                    |
| 7          | 70.20          | 13.6                             | 38.880      | 47.880                    | 2.877372                                                                    |
| 8          | 79.75          | 14.4                             | 38.520      | 47.520                    | 3.072392                                                                    |
| 9          | 89.91          | 15.6                             | 37.980      | 46.980                    | 3.371191                                                                    |

**Table 3** Experiments C data (25 °C)

| C sample # | Time $t$ , sec | IB%, mol%,<br><sup>1</sup> H NMR | [B], mmol/l | [I <sub>2</sub> ], mmol/l | $\frac{1}{(I_{20}-B_0)} \ln \frac{B_0 \cdot [I_2]}{I_{20} \cdot [B]}$ l/mol |
|------------|----------------|----------------------------------|-------------|---------------------------|-----------------------------------------------------------------------------|
| 0          | 0.00           | 0.0                              | 54.000      | 45.000                    | 0.000000                                                                    |
| 1          | 11.43          | 2.1                              | 52.866      | 43.866                    | 0.477702                                                                    |
| 2          | 20.89          | 4.4                              | 51.624      | 42.624                    | 1.027517                                                                    |
| 3          | 31.04          | 6.1                              | 50.706      | 41.706                    | 1.453076                                                                    |
| 4          | 41.08          | 7.4                              | 50.004      | 41.004                    | 1.790203                                                                    |
| 5          | 49.94          | 8.6                              | 49.356      | 40.356                    | 2.110856                                                                    |
| 6          | 60.45          | 10.0                             | 48.600      | 39.600                    | 2.496984                                                                    |
| 7          | 70.34          | 11.2                             | 47.952      | 38.952                    | 2.838759                                                                    |
| 8          | 80.23          | 12.1                             | 47.466      | 38.466                    | 3.101930                                                                    |
| 9          | 90.07          | 12.8                             | 47.088      | 38.088                    | 3.310818                                                                    |

The functional relation between the current iodine concentration ([I<sub>2</sub>]) and reaction time ( $t$ ) is shown in Figures 1-3.

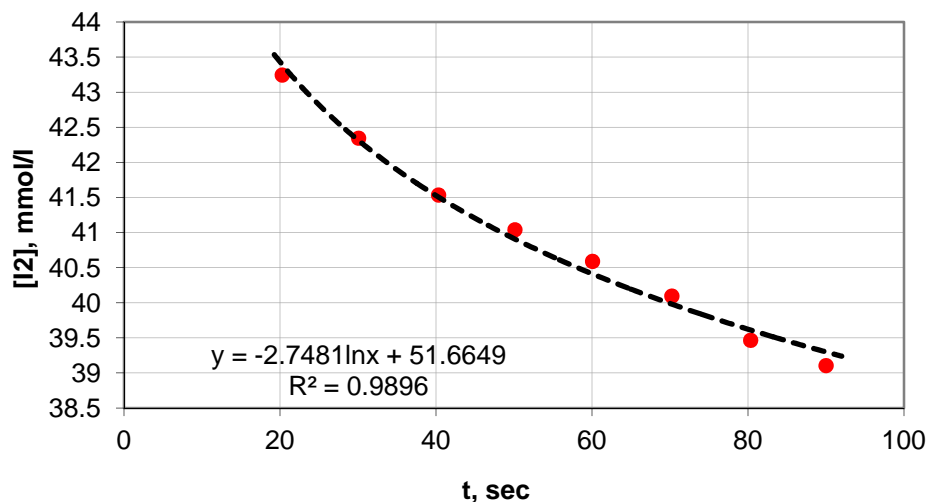

**Figure 1** Experiments A, a plot of [I<sub>2</sub>] against reaction time ( $t$ )

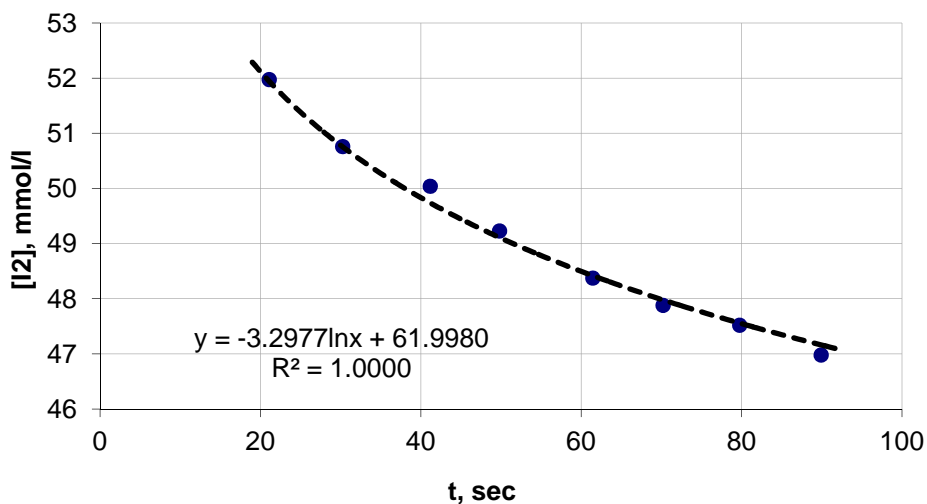

**Figure 2** Experiments B, a plot of  $[I_2]$  against reaction time ( $t$ )

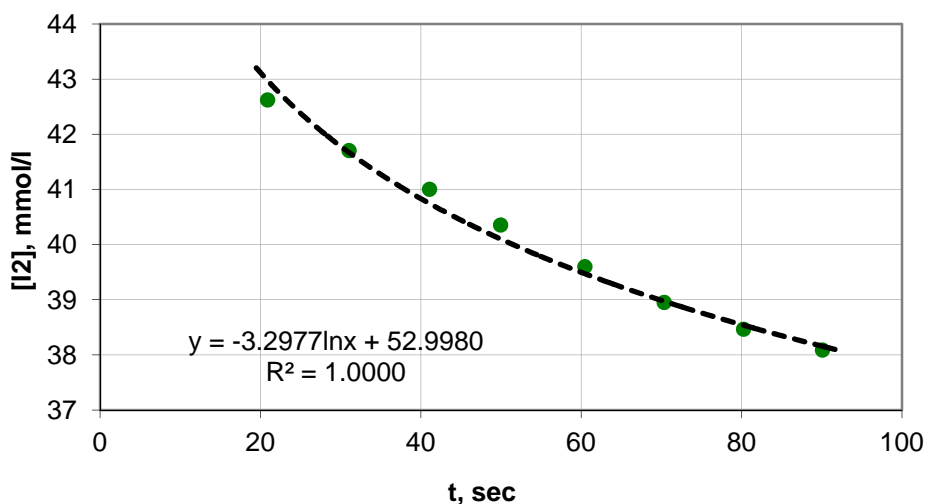

**Figure 3** Experiments C, a plot of  $[I_2]$  against reaction time ( $t$ )

The equations for iodine concentration and reaction rate for each case are<sup>2</sup>  
 $[I_2] = -2.7481\ln t + 51.6649$ ,  $r_A = -\frac{d[I_2]}{dt} = \frac{2.7481}{t}$ , where  $20 \leq t \leq 90$  sec (experiments A);  
 $[I_2] = -3.2977\ln t + 61.9980$ ,  $r_B = -\frac{d[I_2]}{dt} = \frac{3.2977}{t}$ , where  $20 \leq t \leq 90$  sec (experiments B);  
 $[I_2] = -3.2977\ln t + 52.9980$ ,  $r_C = -\frac{d[I_2]}{dt} = \frac{3.2977}{t}$ , where  $20 \leq t \leq 90$  sec (experiments C).

The reaction order in iodine is  $n_{I_2} = \log_m \frac{r_B}{r_A} = 1$ , where  $m = \frac{I_{20B}}{I_{20A}} = 1.2$ .

The reaction order in betulin is  $n_B = \log_m \frac{r_C}{r_A} = 1$ , where  $m = \frac{B_{0C}}{B_{0A}} = 1.2$ .

The iodination reaction is second order overall, first order in iodine and first order in betulin. The equation for the reaction rate is  $r = k \cdot [I_2] \cdot [B]$ . Then the following equations must be correct and can be used to calculate the rate

<sup>2</sup> *March's Advanced Organic Chemistry*, eds. M. B. Smith, J. March, John Wiley & Sons, New York, 2001, 290.

constant ( $k$ ) at 25 °C:  $\frac{1}{[I2]} = kt + \frac{1}{I2_0}$  (when  $[B] = [I2]$ , experiments **A**) and  $\frac{1}{(I2_0 - B_0)} \ln \frac{B_0 \cdot [I2]}{I2_0 \cdot [B]} = kt$  (when  $[B] \neq [I2]$ , experiments **B** and **C**) (Figures 4-6).

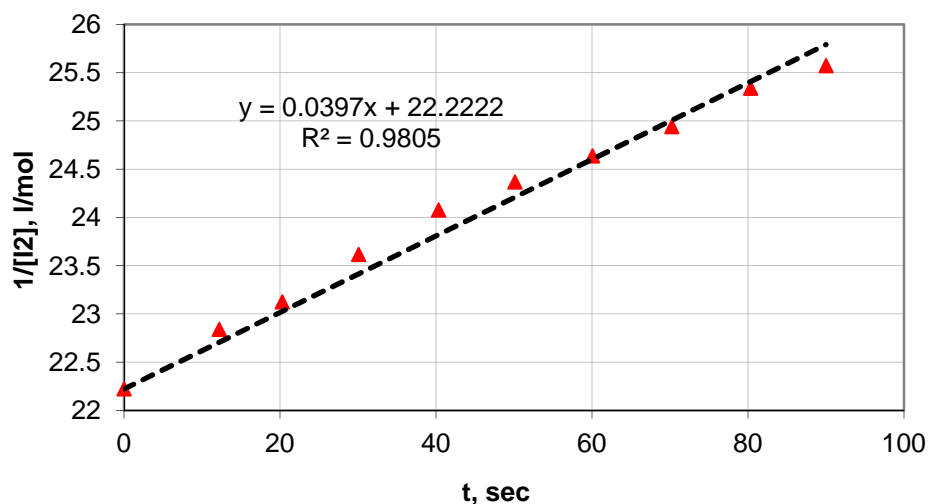

Figure 4 Experiments **A**, a plot of  $\frac{1}{[I2]}$  against reaction time ( $t$ )

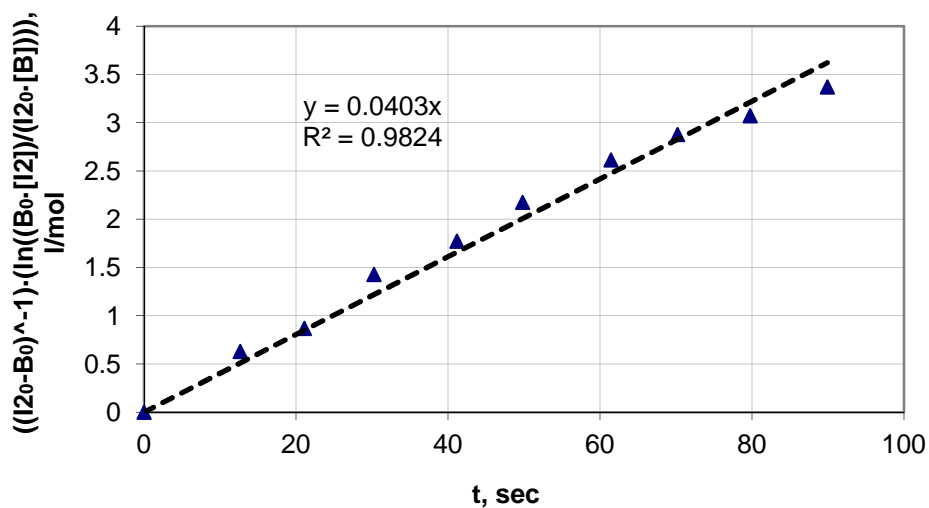

Figure 5 Experiments **B**, a plot of  $\frac{1}{(I2_0 - B_0)} \ln \frac{B_0 \cdot [I2]}{I2_0 \cdot [B]}$  against reaction time ( $t$ )

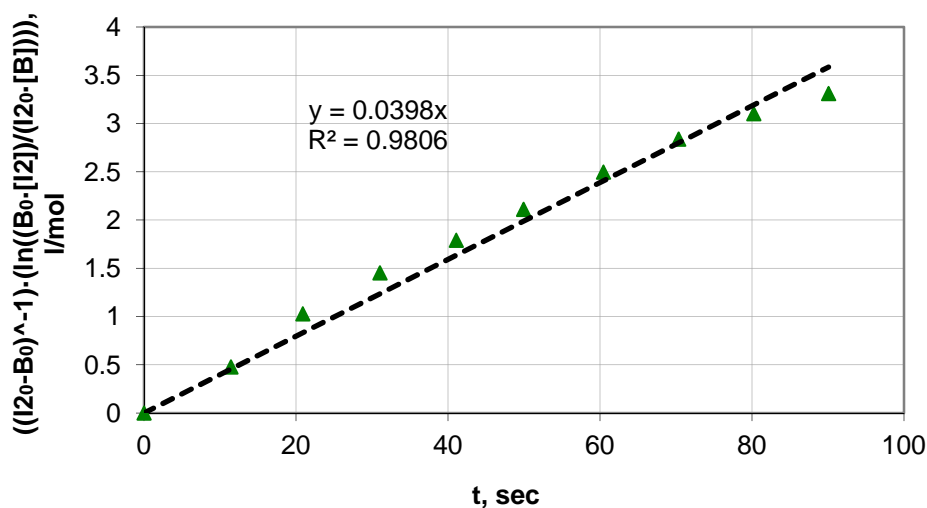

**Figure 6** Experiments C, a plot of  $\frac{1}{(I2_0 - B_0)} \ln \frac{B_0 \cdot [I2]}{I2_0 \cdot [B]}$  against reaction time ( $t$ )

The plots of  $\frac{1}{[I2]}$  and  $\frac{1}{(I2_0 - B_0)} \ln \frac{B_0 \cdot [I2]}{I2_0 \cdot [B]}$  against  $t$  are linear (if  $0 \leq t \leq 90$  sec). This corresponds to reaction second order overall (first order in each reagent) and rate constant  $k$  is a slope of these lines. The following rate constant values were obtained:

$k_1 = 0.0397$  l/(mol·sec) (experiments **A**);

$k_2 = 0.0403$  l/(mol·sec) (experiments **B**);

$k_3 = 0.0398$  l/(mol·sec) (experiments **C**).

Average  $k = \frac{\sum_{i=1}^n k_i}{n} = 0.0399$  l/(mol·sec).

Standard deviation  $s_k = \sqrt{\frac{\sum_{i=1}^n (k_i - k)^2}{n-1}} = 0.0003$  l/(mol·sec).

Rate constant for the reaction at 25 °C is

$k = (3.99 \pm 0.03) \cdot 10^{-2}$  l/(mol·sec).

### 2.3. Thermodynamic parameters of the iodination reaction

The data from experiments **A** and **D-G** was used. **A** and **D-G** samples are the mixtures of 30-iodolup-20-en-3 $\beta$ ,28-diol (**IB**) product and starting betulin (**B**) (Scheme 1). They were analyzed by <sup>1</sup>H NMR to determine the content of **IB** (mol%) in the mixture. It could be determined as a ratio of total integral intensity of **IB** 29-CH<sub>2</sub> signals (5.17 ppm (s) and 5.00 ppm (s)) to total integral intensity of **IB** 29-CH<sub>2</sub> and **B** 29-CH<sub>2</sub> (4.68 ppm (s) and 4.58 ppm (s)) signals. This value was used to determine the current (at the moment of reaction termination with sodium bisulfite) concentration (mmol/l) of betulin ( $[B]$ ) and iodine ( $[I2]$ ):  $[B] = B_0 - B_0 \frac{IB\%}{100}$  and  $[I2] = I2_0 - I2_0 \frac{IB\%}{100}$ , where  $IB\%$  is the content of **IB** (mol%) in the reaction sample,  $B_0$  and  $I2_0$  are starting concentrations of betulin and iodine (mmol/l) respectively (Tables 1, 4-7).

**Table 4** Experiments **D** data (35 °C)

| D sample # | Time $t$ , sec | IB%, mol%,<br><sup>1</sup> H NMR | [B] = [I2], mmol/l | $\frac{1}{[I2]^2}$ , l/mol |
|------------|----------------|----------------------------------|--------------------|----------------------------|
| 0          | 0.00           | 0.0                              | 45.000             | 22.22222                   |
| 1          | 10.21          | 3.6                              | 43.380             | 23.05210                   |
| 2          | 20.02          | 5.7                              | 42.435             | 23.56545                   |
| 3          | 30.21          | 7.8                              | 41.490             | 24.10219                   |
| 4          | 40.21          | 9.2                              | 40.860             | 24.47381                   |
| 5          | 50.06          | 11.2                             | 39.960             | 25.02503                   |
| 6          | 60.46          | 12.3                             | 39.465             | 25.33891                   |
| 7          | 70.08          | 14.0                             | 38.700             | 25.83979                   |
| 8          | 79.56          | 14.9                             | 38.295             | 26.11307                   |

**Table 5** Experiments **E** data (45 °C)

| E sample # | Time $t$ , sec | IB%, mol%,<br><sup>1</sup> H NMR | [B] = [I2], mmol/l | $\frac{1}{[I2]^2}$ , l/mol |
|------------|----------------|----------------------------------|--------------------|----------------------------|
| 0          | 0.00           | 0.0                              | 45.000             | 22.22222                   |
| 1          | 8.93           | 3.4                              | 43.470             | 23.00437                   |
| 2          | 16.14          | 6.1                              | 42.255             | 23.66584                   |
| 3          | 22.22          | 7.6                              | 41.580             | 24.05002                   |
| 4          | 28.66          | 8.7                              | 41.085             | 24.33978                   |
| 5          | 35.45          | 10.4                             | 40.320             | 24.80159                   |
| 6          | 42.93          | 11.5                             | 39.825             | 25.10986                   |
| 7          | 49.38          | 13.0                             | 39.150             | 25.54278                   |
| 8          | 56.65          | 14.9                             | 38.295             | 26.11307                   |

**Table 6** Experiments **F** data (55 °C)

| F sample # | Time $t$ , sec | IB%, mol%,<br><sup>1</sup> H NMR | [B] = [I2], mmol/l | $\frac{1}{[I2]^2}$ , l/mol |
|------------|----------------|----------------------------------|--------------------|----------------------------|
| 0          | 0.00           | 0.0                              | 45.000             | 22.22222                   |
| 1          | 7.58           | 4.7                              | 42.885             | 23.31818                   |
| 2          | 13.61          | 7.2                              | 41.760             | 23.94636                   |
| 3          | 19.28          | 8.8                              | 41.040             | 24.36647                   |
| 4          | 23.36          | 10.0                             | 40.500             | 24.69136                   |
| 5          | 30.38          | 11.9                             | 39.645             | 25.22386                   |
| 6          | 35.38          | 13.5                             | 38.925             | 25.69043                   |

**Table 7** Experiments **G** data (65 °C)

| G sample # | Time $t$ , sec | IB%, mol%,<br><sup>1</sup> H NMR | [B] = [I2], mmol/l | $\frac{1}{[I2]^2}$ , l/mol |
|------------|----------------|----------------------------------|--------------------|----------------------------|
| 0          | 0.00           | 0.0                              | 45.000             | 22.22222                   |
| 1          | 7.09           | 5.3                              | 42.615             | 23.46592                   |
| 2          | 11.99          | 8.3                              | 41.265             | 24.23361                   |
| 3          | 16.22          | 10.0                             | 40.500             | 24.69136                   |
| 4          | 19.69          | 11.5                             | 39.825             | 25.10986                   |
| 5          | 25.12          | 14.0                             | 38.700             | 25.83979                   |

This reaction is second order overall, first order in iodine and first order in betulin. The rate of the reaction is  $r = k \cdot [I2] \cdot [B]$ . Then the equation  $\frac{1}{[I2]} = kt + \frac{1}{I2_0}$  (when  $[B] = [I2]$ , experiments **A** and **D-G**) must be correct and can be used to calculate the rate constant at different temperatures (Figures 4, 7-10).

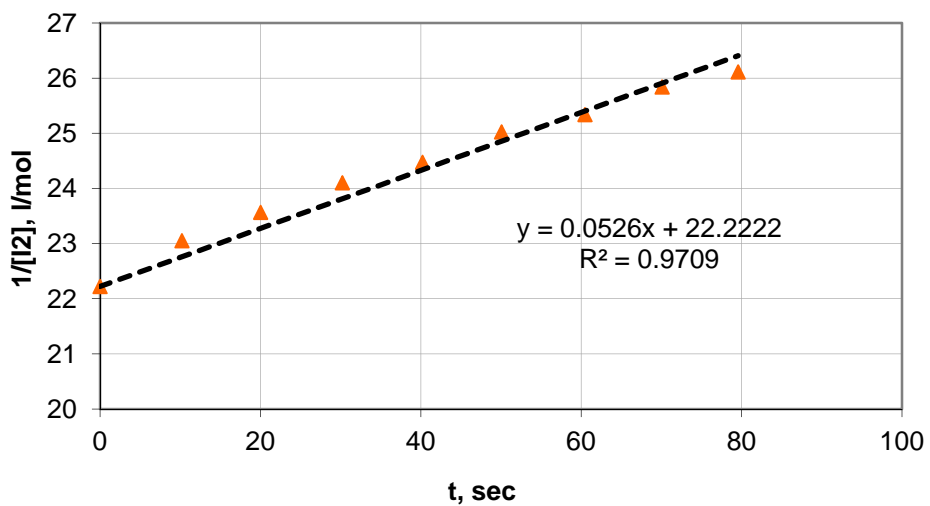

Figure 7 Experiments D, a plot of  $\frac{1}{[12]}$  against reaction time ( $t$ )

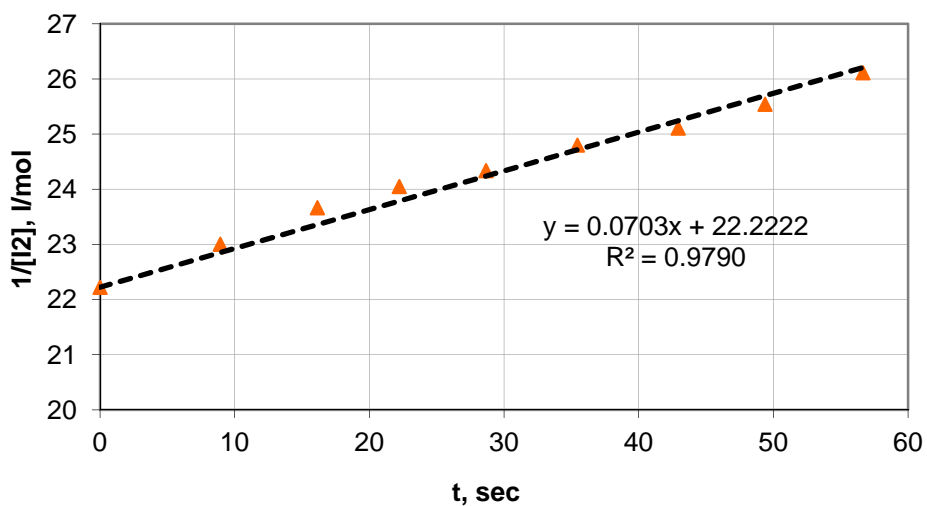

Figure 8 Experiments E, a plot of  $\frac{1}{[12]}$  against reaction time ( $t$ )

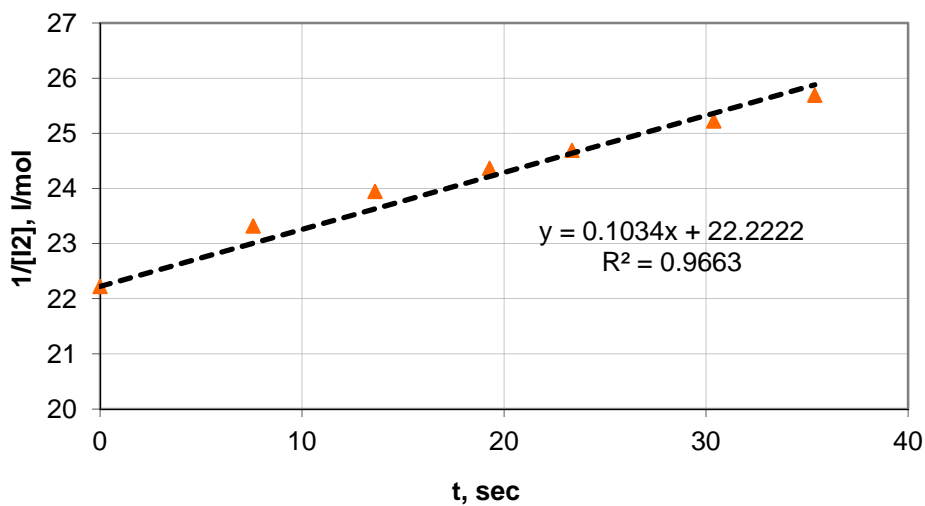

**Figure 9** Experiments F, a plot of  $\frac{1}{[I_2]}$  against reaction time ( $t$ )

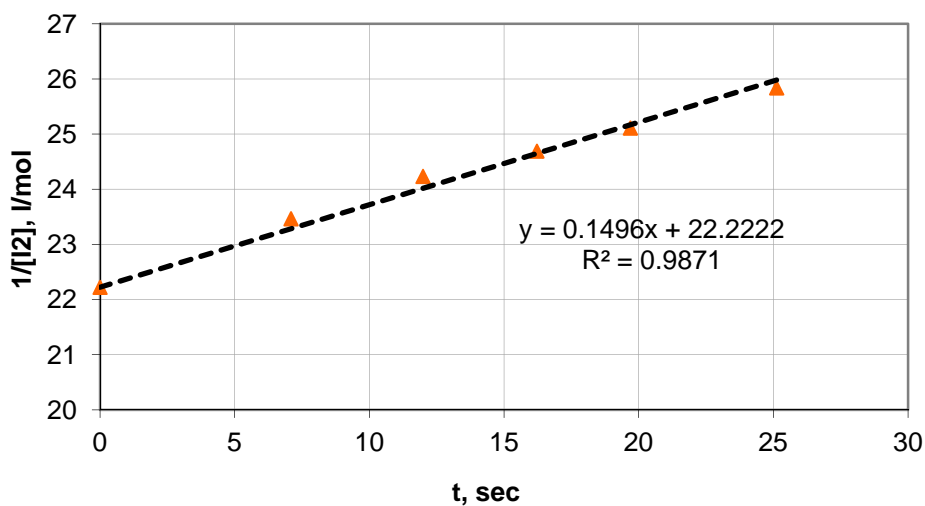

**Figure 10** Experiments G, a plot of  $\frac{1}{[I_2]}$  against reaction time ( $t$ )

The plots of  $\frac{1}{[I_2]}$  against  $t$  are linear (if  $0 \leq t \leq 90$  sec). This corresponds to reaction second order overall (first order in each reagent) and rate constant  $k$  is a slope of these lines (Table 8).

**Table 8** Rate constants at different reaction temperatures

| Experiments | Reaction temperature, °C | Reaction temperature, K | $-\frac{1}{RT}$ , -mol/cal | $k$ , l/(mol·sec) | $\ln k$  |
|-------------|--------------------------|-------------------------|----------------------------|-------------------|----------|
| <b>A</b>    | 25                       | 298.15                  | -0.00169                   | 0.0397            | -3.22640 |
| <b>D</b>    | 35                       | 308.15                  | -0.00163                   | 0.0526            | -2.94504 |
| <b>E</b>    | 45                       | 318.15                  | -0.00158                   | 0.0703            | -2.65498 |
| <b>F</b>    | 55                       | 328.15                  | -0.00153                   | 0.1034            | -2.26915 |
| <b>G</b>    | 65                       | 338.15                  | -0.00149                   | 0.1496            | -1.89979 |

The set of rate constants at different reaction temperatures (Table 8) is used to determine the activation energy via Arrhenius equation  $k = Ae^{-\frac{E_A}{RT}}$  or  $\ln k = -\frac{E_A}{RT} + \ln A$ , where  $E_A$  is activation energy (cal/mol);  $k$  is rate constant (l/(mol·sec) for second order reaction); universal gas constant  $R = 1.987$  cal/(mol·K);  $A$  is pre-exponential factor (l/(mol·sec) for second order reaction);  $T$  stands for absolute temperature (K). A plot of experimental  $y = \ln k$  against  $x = -\frac{1}{RT}$  is linear with high coefficient of determination (the least squares linear regression analysis,  $y = 6646.7018x + 7.9360$ ,  $R^2 = 0.9882$ ) (Figure 11).

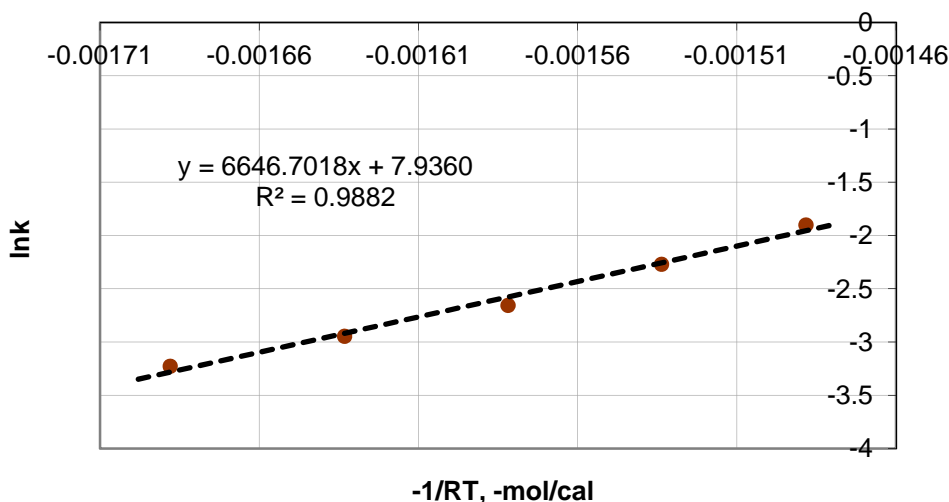

**Figure 11** A plot of  $\ln k$  against  $-\frac{1}{RT}$

Activation energy was found for every combination of four experiments (Table 8) to determine average  $E_A$  and its deviation value. The following equations were obtained (the least squares linear regression analysis,  $y = \ln k$ ,  $x = -\frac{1}{RT}$ ):

$$y = 6130.0678x + 7.0905 \quad (R^2 = 0.9889, \text{ experiments A, D, E, F}), E_{A1} = 6130.1 \text{ cal/mol};$$

$$y = 6576.6383x + 7.8322 \quad (R^2 = 0.9873, \text{ experiments A, E, F, G}), E_{A2} = 6576.6 \text{ cal/mol};$$

$$y = 6658.7807x + 7.9743 \quad (R^2 = 0.9948, \text{ experiments A, D, F, G}), E_{A3} = 6658.8 \text{ cal/mol};$$

$$y = 6680.3227x + 7.9925 \quad (R^2 = 0.9868, \text{ experiments A, D, E, G}), E_{A4} = 6680.3 \text{ cal/mol};$$

$$y = 7276.8468x + 8.9043 \quad (R^2 = 0.9929, \text{ experiments D, E, F, G}), E_{A5} = 7276.8 \text{ cal/mol}.$$

$$\text{Average } E_A = \frac{\sum_{i=1}^n E_{Ai}}{n} = 6664.5 \text{ cal/mol}.$$

$$\text{Standard deviation } s_{E_A} = \sqrt{\frac{\sum_{i=1}^n (E_{Ai} - E_A)^2}{n-1}} = 408.8 \text{ cal/mol}.$$



The activation energy of reaction is

$$E_A = 6664.5 \pm 408.8 \text{ cal/mol.}$$

The other thermodynamic parameters of reaction were calculated as following.<sup>3</sup>

$$\text{Activation enthalpy } \Delta H^\ddagger = E_A - RT = 6664.5 - 1.987 \cdot 298.15 = 6072.1 \text{ cal/mol.}$$

$$\text{Standard deviation } s_{\Delta H^\ddagger} = \sqrt{\left(\frac{d\Delta H^\ddagger}{dE_A} s_{E_A}\right)^2 + \left(\frac{d\Delta H^\ddagger}{dT} s_T\right)^2} = \sqrt{s_{E_A}^2 + (R s_T)^2} = \sqrt{408.8^2 + (1.987 \cdot 0.1)^2} = 408.8 \text{ cal/mol.}$$

$$\Delta H^\ddagger_{298} = 6072.1 \pm 408.8 \text{ cal/mol.}$$

$$\text{Activation entropy for energies in calorie units } \Delta S^\ddagger = 4.576 \cdot \left(\lg k - 10.753 - \lg T + \frac{E_A}{4.576 \cdot T}\right) = 4.576 \cdot \left(\lg 0.0399 - 10.753 - \lg 298.15 + \frac{6664.5}{4.576 \cdot 298.15}\right) = -44.578 \text{ cal/(mol} \cdot \text{K).}$$

Standard deviation

$$s_{\Delta S^\ddagger} = \sqrt{\left(\frac{d\Delta S^\ddagger}{dk} s_k\right)^2 + \left(\frac{d\Delta S^\ddagger}{dE_A} s_{E_A}\right)^2 + \left(\frac{d\Delta S^\ddagger}{dT} s_T\right)^2} = \sqrt{\left(\frac{4.576 \lg e}{k} s_k\right)^2 + \left(\frac{s_{E_A}}{T}\right)^2 + \left(\frac{4.576 \lg e}{T} + \frac{E_A}{T^2}\right)^2 s_T^2} = \sqrt{\left(\frac{4.576 \cdot 0.4343}{0.0399} \cdot 0.0003\right)^2 + \left(\frac{408.8}{298.15}\right)^2 + \left(\frac{4.576 \cdot 0.4343}{298.15} + \frac{6664.5}{298.15^2}\right)^2 \cdot 0.1^2} = 1.374 \text{ cal/(mol} \cdot \text{K).}$$

$$\Delta S^\ddagger_{298} = -44.578 \pm 1.374 \text{ cal/(mol} \cdot \text{K).}$$

$$\text{Activation free energy } \Delta G^\ddagger = \Delta H^\ddagger - T \Delta S^\ddagger = 6072.1 + 298.15 \cdot 44.578 = 19363.0 \text{ cal/mol.}$$

$$\text{Standard deviation } s_{\Delta G^\ddagger} = \sqrt{\left(\frac{d\Delta G^\ddagger}{d\Delta H^\ddagger} s_{\Delta H^\ddagger}\right)^2 + \left(\frac{d\Delta G^\ddagger}{d\Delta S^\ddagger} s_{\Delta S^\ddagger}\right)^2 + \left(\frac{d\Delta G^\ddagger}{dT} s_T\right)^2} = \sqrt{s_{\Delta H^\ddagger}^2 + (T s_{\Delta S^\ddagger})^2 + (\Delta S^\ddagger s_T)^2} = \sqrt{408.8^2 + (298.15 \cdot 1.374)^2 + (44.578 \cdot 0.1)^2} = 578.7 \text{ cal/mol.}$$

$$\Delta G^\ddagger_{298} = 19363.0 \pm 578.7 \text{ cal/mol.}$$

<sup>3</sup> *Technique of Organic Chemistry, Volume VIII, Investigation of Rates and Mechanisms of Reaction, Part I*, eds. S. L. Friess, E. S. Lewis, A. Weissberger, Interscience Publishers, Inc., New York, 1961, 199.

### 3. Optimized geometries for all species

Quantum mechanics calculations of the model reaction between 2,3,3-trimethylbut-1-ene (**4**) and iodine in *N,N*-dimethylacetamide (DMA) were performed by using the Gaussian 03 program package.<sup>4</sup> Geometries of all structures were fully optimized at the PW91PW91,<sup>5a-c</sup> ωB97XD<sup>6</sup> and MP2<sup>7a-c</sup> levels of theory using the DZVP<sup>8</sup> basis set. Stationary points were confirmed to be minima or transition states (TS) by calculating the normal vibrations within the harmonic approximation. The reaction pathways along both directions from the transition structures were followed by the IRC<sup>9a,b</sup> method. All computed energies are corrected for zero-point vibrational energies (ZPVE). Additionally, single-point calculations including solvent model (COSMO, DMF as a model solvent) were done with Orca 2.6 program<sup>10</sup> (Table 9).

#### *N,N*-Dimethylacetamide (DMA)

```
1\1\FAU-CCC-CCAT077\FOpt\RPW91PW91\Gen\C4H9N1O1\TS\20-Nov-2007\0\#P PW91PW91/GEN OPT FREQ=NORAMAN NAME=TS\DMA\0,1\N,0.3133106538,-0.4686983927,0.2209351628\C,-0.511342561,0.5857254055,-0.1319065359\C,-0.2028561183,1.3165482529,-1.4364060811\O,-1.4692747064,0.9333906944,0.5779434639\H,-0.9520527929,2.1089757137,-1.5460844881\H,0.797682464,1.7769300688,-1.4298857083\H,-0.2641080568,0.6509873347,-2.3118169815\C,1.4536967403,-0.9397565741,-0.5508993149\H,1.318525722,-1.9974531698,-0.8410502195\H,1.5877855232,-0.3507806141,-1.4642923782\H,2.3829575232,-0.8689793294,0.0429308649\C,0.0512073191,-1.1921383656,1.460108144\H,-0.1485014199,-2.2579940289,1.2525186287\H,0.9194248215,-1.1264630275,2.1390087376\H,-0.8249229901,-0.7437320661,1.9432004205\\Version=IA32L-G03 RevC.02\State=1-A\HF=-287.7529113\RMSD=9.173e-09\RMSF=4.039e-06\Dipole=1.2330104,-0.7063626,-0.5831449\PG=C01 [X(C4H9N1O1)]\@
```

ZPVE = 79.74663 kcal/mol

#### Iodine (I<sub>2</sub>)

```
1\1\FAU-CCC-CCAT072\FOpt\RPW91PW91\Gen\I2\SHUBINA\20-Nov-2007\0\#P PW91PW91/GEN OPT FREQ=NORAMAN NAME=SHUBINA\I2\0,1\I,-1.3666243272,-0.000005336,0.000005336\I,1.3666243272,0.000005336,-0.000005336\\Vers ion=IA32L-G03 RevC.02\State=1-SGG\HF=-13840.4231558\RMSD=5.260e-09\RMSF=2.178e-05\Dipole=0.,0.,0.\PG=D*H [C*(I1.I1)]\@
```

ZPVE = 0.29937 kcal/mol

<sup>4</sup> Gaussian 03, Revision D.02, M. J. Frisch, G. W. Trucks, H. B. Schlegel, G. E. Scuseria, M. A. Robb, J. R. Cheeseman, J. A. Montgomery, Jr., T. Vreven, K. N. Kudin, J. C. Burant, J. M. Millam, S. S. Iyengar, J. Tomasi, V. Barone, B. Mennucci, M. Cossi, G. Scalmani, N. Rega, G. A. Petersson, H. Nakatsuji, M. Hada, M. Ehara, K. Toyota, R. Fukuda, J. Hasegawa, M. Ishida, T. Nakajima, Y. Honda, O. Kitao, H. Nakai, M. Klene, X. Li, J. E. Knox, H. P. Hratchian, J. B. Cross, V. Bakken, C. Adamo, J. Jaramillo, R. Gomperts, R. E. Stratmann, O. Yazyev, A. J. Austin, R. Cammi, C. Pomelli, J. W. Ochterski, P. Y. Ayala, K. Morokuma, G. A. Voth, P. Salvador, J. J. Dannenberg, V. G. Zakrzewski, S. Dapprich, A. D. Daniels, M. C. Strain, O. Farkas, D. K. Malick, A. D. Rabuck, K. Raghavachari, J. B. Foresman, J. V. Ortiz, Q. Cui, A. G. Baboul, S. Clifford, J. Cioslowski, B. B. Stefanov, G. Liu, A. Liashenko, P. Piskorz, I. Komaromi, R. L. Martin, D. J. Fox, T. Keith, M. A. Al-Laham, C. Y. Peng, A. Nanayakkara, M. Challacombe, P. M. W. Gill, B. Johnson, W. Chen, M. W. Wong, C. Gonzalez, J. A. Pople, Gaussian, Inc., Wallingford CT 2004.

<sup>5</sup> (a) J. P. Perdew, J. A. Chevary, S. H. Vosko, K. A. Jackson, M. R. Pederson, D. J. Singh, C. Fiolhais, *Phys. Rev. B*, 1992, **46**, 6671; (b) J. P. Perdew, J. A. Chevary, S. H. Vosko, K. A. Jackson, M. R. Pederson, D. J. Singh, C. Fiolhais, *Phys. Rev. B*, 1993, **48**, 4978; (c) J. P. Perdew, K. Burke, Y. Wang, *Phys. Rev. B*, 1996, **54**, 16533.

<sup>6</sup> J.-D. Chai, M. Head-Gordon, *Phys. Chem. Chem. Phys.*, 2008, **10**, 6615.

<sup>7</sup> (a) M. Head-Gordon, J. A. Pople, M. J. Frisch, *Chem. Phys. Lett.*, 1988, **153**, 503; (b) S. Saebo, J. Almlöf, *Chem. Phys. Lett.*, 1989, **154**, 83; (c) C. Møller, M. S. Plesset, *Phys. Rev.*, 1934, **46**, 0618.

<sup>8</sup> N. Godbout, D. R. Salahub, J. Andzelm, E. Wimmer, *Can. J. Chem.*, 1992, **70**, 560.

<sup>9</sup> (a) C. Gonzalez, H. B. Schlegel, *J. Phys. Chem.*, 1990, **94**, 5523; (b) C. Gonzalez, H. B. Schlegel, *J. Chem. Phys.*, 1989, **90**, 2154.

<sup>10</sup> F. Neese, *WIREs: Comput. Mol. Sci.*, 2012, **2**, 73.

### CTC1 (DMA—I<sub>2</sub>) (Figure 12)

```
1\1\GINC-A09\FOpt\RPW91PW91\Gen\C4H9I2N1O1\TS\20-Nov-2007\0\#P PW91PW
91/gen OPT Freq=NoRaman Name=TS\DMA:I2\0,1\N,-3.3572371351,0.0812633
383,0.9341917445\C,-2.8371420291,0.946923657,0.0142398039\C,-3.7392001
124,1.471621201,-1.0925132482\O,-1.6432323617,1.3396339849,0.068858621
2\H,-3.1774024932,2.2426252849,-1.6316680918\H,-4.001227409,0.67410863
77,-1.8057789896\H,-4.6732494329,1.9084197747,-0.7085983557\I,0.604320
4324,-0.1535283816,-0.0903326795\C,-4.6865444807,-0.5160671367,0.85026
83556\H,-5.2783742436,-0.2658521702,1.7470256112\H,-5.2269595591,-0.16
17721277,-0.0331916954\H,-4.606124487,-1.6144887049,0.7862326642\C,-2.
5260203789,-0.3792296618,2.0479656922\H,-3.1494758162,-0.451155404,2.9
52583253\H,-2.0845248466,-1.3670608638,1.8369017688\H,-1.7146329161,0.
3379417191,2.2159074879\I,2.921007269,-1.670543147,-0.3592819423\Vers
ion=IA64L-G03RevD.01\State=1-A\HF=-14128.1901116\RMSD=3.457e-09\RMSF=9
.510e-05\Thermal=0.\Dipole=-2.8941138,-0.1372185,0.4625719\PG=C01 [X(C
4H9I2N1O1)]\@
```

ZPVE = 80.77651 kcal/mol

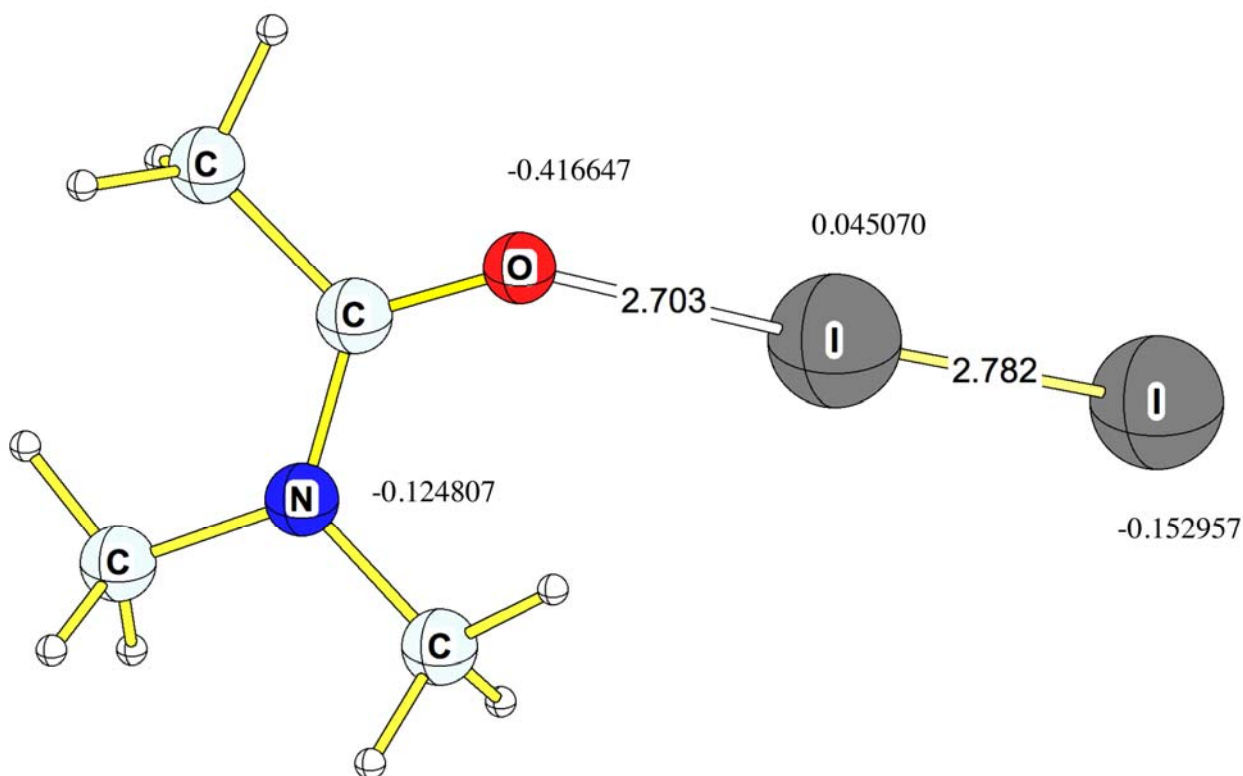

Figure 12 PW91PW91/DZVP computed structure of the DMA—I<sub>2</sub> complex (CTC1)

### 2,3,3-Trimethylbut-1-ene (4)

```
1\1\GINC-A04\FOpt\RPW91PW91\Gen\C7H14\TS\20-Nov-2007\0\#P PW91PW91/ge
n Freq=NoRaman OPT Name=TS\tBuallyl\0,1\C,1.3469696793,0.3568478611,
-1.2875519989\C,0.6029247865,-0.005871725,0.0125092001\H,2.435157407,0
```

.3178159397,-1.1191235169\H,1.0981053351,1.3738957295,-1.6300668822\H,  
1.1142215745,-0.3476263715,-2.1016401521\C,-0.9248745324,0.0535464066,  
-0.1555263443\C,1.0498144522,0.9831027153,1.1184720004\C,1.0236542982,  
-1.441347569,0.4208769126\C,-1.7719492306,-0.1639480769,1.0828063812\H  
,0.6297889937,0.7217369448,2.1017608666\H,2.1476650796,0.9721845855,1.  
2159192612\H,0.7411070357,2.0132019363,0.8777319352\H,0.5910027072,-1.  
743369068,1.387140965\H,0.7084792236,-2.1746661252,-0.3382171751\H,2.1  
2002456,-1.5022085882,0.5197193005\C,-1.527251344,0.2892034253,-1.3403  
794177\H,-2.6186876704,0.3132546804,-1.4193715458\H,-0.9731238572,0.46  
63820243,-2.2645816705\H,-2.8406559708,-0.1947322018,0.8264442879\H,-1  
.522654536,-1.1067798824,1.5963555955\H,-1.6291079913,0.6449673592,1.8  
182419972\Version=IA64L-G03RevD.01\State=1-A\HF=-275.0424089\RMSD=8.5  
30e-09\RMSF=4.404e-06\Thermal=0.\Dipole=0.1044207,-0.0294048,0.1689564  
\PG=C01 [X(C7H14)]\ \@

ZPVE = 118.46823 kcal/mol

### CTC2 (DMA—I<sub>2</sub>—(4)) (Figure 13)

1\1\GINC-A06\FOpt\RPW91PW91\Gen\C11H23I2N1O1\TS\03-Dec-2007\0\#P PW91  
PW91/gen OPT Freq=NoRaman scfcyc=300 Name=TS\Complex with DMA...I2\0  
,1\C,1.914823834,-2.9537176426,-0.6567417496\C,2.9253333036,-2.2312206  
981,0.2557894661\H,1.4547171655,-3.7947533064,-0.112698143\H,2.3984927  
389,-3.3673848109,-1.5560132739\H,1.1061267358,-2.2784671972,-0.978107  
4551\C,3.5784864435,-1.0260703557,-0.4422556684\C,4.0216962676,-3.2499  
498176,0.6621671066\C,2.1774174114,-1.7631452893,1.5293408519\C,4.4999  
694874,-0.1512992707,0.3843577066\H,4.7389100405,-2.8229437579,1.38021  
05467\H,3.5629875748,-4.1314240116,1.1405102018\H,4.5865565581,-3.5947  
42601,-0.2186295245\H,2.8601868309,-1.3153308656,2.2676826418\H,1.4036  
062839,-1.0184995848,1.2840516435\H,1.6839095005,-2.621494561,2.015084  
7218\C,3.3606882973,-0.7186748202,-1.7381220258\H,3.9493347803,0.37723  
57654,1.1797902997\H,5.2978626529,-0.7315409092,0.8766638095\H,4.97908  
78493,0.6128756371,-0.2443925056\N,-4.7318473885,-1.1087385762,0.19770  
96185\C,-3.8583390714,-0.0625892154,0.3132459292\C,-4.3742464975,1.258  
4077151,0.8545956006\O,-2.6552181007,-0.2130324945,-0.0277165035\H,-3.  
5329516043,1.9589721185,0.9122839957\H,-5.1435094681,1.6918601061,0.19  
70472119\H,-4.8071075859,1.1456003226,1.8599828264\I,-0.7122122932,1.5  
935201615,-0.0084199272\C,-6.1434076946,-1.0577134686,0.5626318468\H,-  
6.3507643308,-1.7405121653,1.4047676395\H,-6.4463850356,-0.0468245108,  
0.8526380131\H,-6.7644855252,-1.3704097101,-0.2934840496\C,-4.25934437  
78,-2.4016618786,-0.2983820735\H,-4.4310593019,-3.1833443989,0.4601112  
173\H,-4.8028142879,-2.6778064565,-1.2171269789\H,-3.1881272271,-2.330  
7475683,-0.5149771701\I,1.3833395725,3.4373258414,0.0191584006\H,3.847  
312957,0.1474544609,-2.1968375276\H,2.691334505,-1.2924911854,-2.38222  
87196\Version=IA64L-G03RevD.01\State=1-A\HF=-14403.2364742\RMSD=5.523  
e-09\RMSF=4.597e-05\Thermal=0.\Dipole=-3.1340193,-1.331302,0.5124309\PG=C01 [X(C11H23I2N1O1)]\ \@

ZPVE = 199.18801 kcal/mol



```

63935,-1.4429439073,3.3131065639\H,0.8324575263,-1.5749091443,5.059785
8352\C,-0.8163237798,1.1232780921,1.8173976562\H,-1.8095574237,-1.2883
056043,1.1595739899\H,-2.1169205871,-1.8674867728,2.8430682276\H,-3.07
32252214,-0.5470727546,2.1120871097\N,5.6628250326,-0.0513808427,-1.62
52421541\C,4.3441323406,-0.207270904,-1.2952188411\C,3.4142635979,-0.8
453634709,-2.3093790481\O,3.9411632568,0.18051556,-0.1636076408\H,2.40
40522666,-0.8941386309,-1.8859631807\H,3.3697233365,-0.2596471083,-3.2
402933114\H,3.7383233777,-1.8662269514,-2.5629054137\I,1.3487767492,0.
2550563492,0.5118007014\C,6.2669535493,-0.5170873972,-2.8694670111\H,6.
9781379642,-1.3380851123,-2.6721049028\H,5.5092381895,-0.8748125612,-
3.5732216281\H,6.8195025513,0.3085690785,-3.3478574401\C,6.5920400739,
0.5387947866,-0.6616428059\H,7.3296710335,-0.2112544426,-0.3292468174\
H,7.1314384969,1.3788789981,-1.1284710137\H,6.0275677146,0.899527251,0
.2047837742\I,-1.3452375341,-0.8741105605,-1.4374873633\H,-1.421228437
2,1.2569977415,0.9168323101\H,-0.2821835081,2.0035460895,2.1758915343\
\Version=IA64L-G03RevD.01\State=1-A\HF=-14403.1918707\RMSD=6.485e-09\RMSF=3.944e-
06\ZeroPoint=0.3178346\Thermal=0.340597\Dipole=2.8739487,0.
2854422,0.8035669\DipoleDeriv=-0.0249076,-0.0542406,0.018131,-0.070923
    
```

ZPVE = 199.44420 kcal/mol

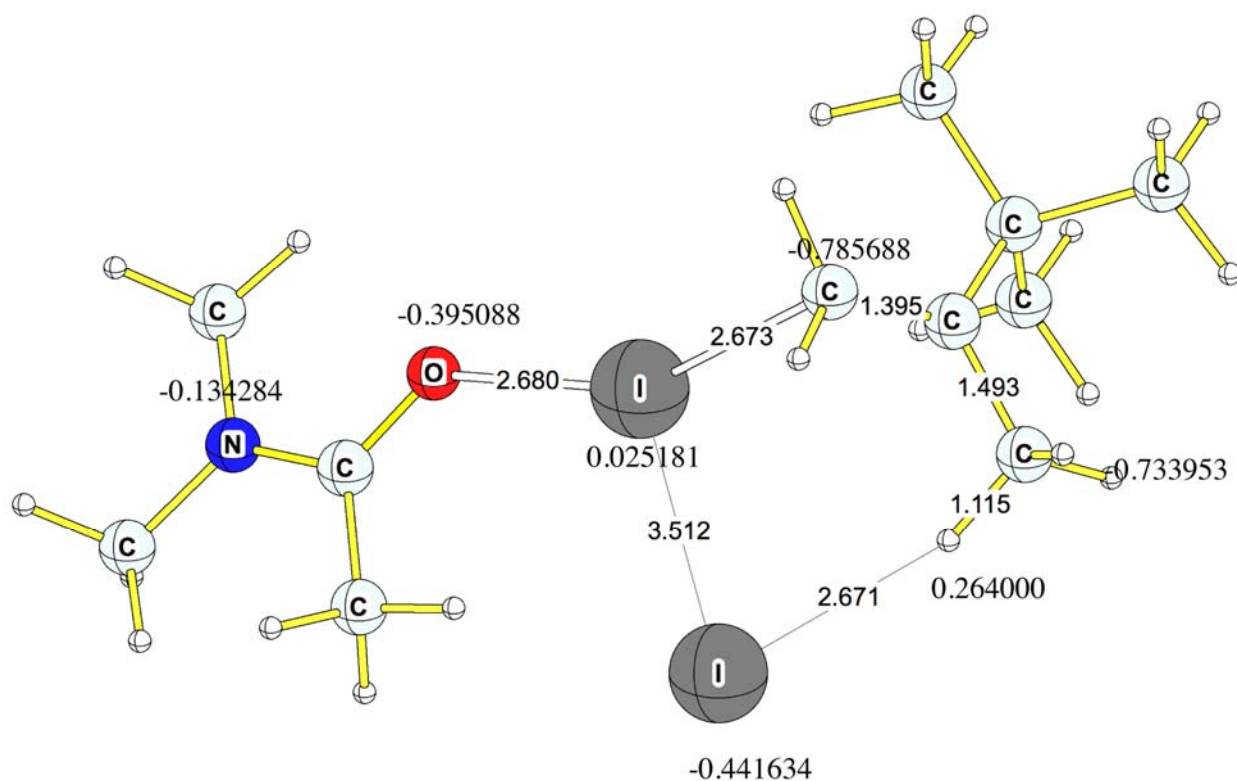

Figure 14 PW91PW91/DZVP computed structure of the transition state (TS)

**Final Cluster FIN ((DMA—(11)—HI) (Figure 15)**

```

1\1\GINC-A03\Freq\RPW91PW91\Gen\C11H23I2N1O1\TS\05-Dec-2007\0\#\#P Geom
=AllCheck Guess=Read SCRF=Check GenChk RPW91PW91/ChkBas Freq\Final Co
mplex with DMA...I2\0,1\C,2.6908771796,-3.4607166762,0.1405744613\C,3
.1436615159,-2.0377011406,0.5284916314\H,2.9904923133,-4.162885371,0.9
    
```

337865919\H,3.1641772929,-3.8077325275,-0.7923437734\H,1.5981543306,-3  
.5334858561,0.028933234\C,2.7137772253,-0.9689564256,-0.4764239021\C,4  
.6977184936,-2.0328681539,0.6039107376\C,2.5643693378,-1.6922270665,1.  
9269091311\C,3.0004421903,0.4069936859,-0.2232512929\H,5.0939483018,-1  
.0785807699,0.9799845804\H,5.0270158582,-2.8270899337,1.2926775714\H,5  
.1502940171,-2.2292574662,-0.3810466386\H,2.8558900375,-0.688558075,2.  
2694176177\H,1.4652050455,-1.7338622231,1.9182353942\H,2.9357203436,-2  
.4244413439,2.6617322696\C,1.9371366567,-1.3116235239,-1.6674623029\H,  
2.0888181468,0.8931907693,0.4359663492\H,3.8437556484,0.6153567838,0.4  
447555164\H,2.9880781524,1.0622486061,-1.1036271672\N,-5.0285693359,-0  
.608549623,0.1082461445\C,-3.6595626118,-0.5110562341,0.0668347081\C,-  
2.9930931782,0.6015491916,0.854276419\O,-2.9932144795,-1.3326129115,-0  
.6120595774\H,-1.9062192439,0.5337831814,0.7310250389\H,-3.3113617057,  
1.5957790662,0.5044916093\H,-3.2195290165,0.5339998236,1.9295282959\I,  
-0.270452988,-1.3132729765,-1.0964461941\C,-5.9027739958,0.2726927675,  
0.8729606021\H,-6.4413005116,-0.2958575536,1.6514886491\H,-5.336498567  
7,1.0731231356,1.3591289327\H,-6.6522699227,0.7348593337,0.2076763424\  
C,-5.7039638041,-1.6744304356,-0.6285380579\H,-6.2732389678,-2.3171208  
466,0.064372927\H,-6.4055604109,-1.2451639998,-1.3636652426\H,-4.95101  
7874,-2.275974491,-1.1495182914\I,0.8923165909,2.2016132487,1.64161752  
61\H,1.985967506,-0.561783419,-2.4635194959\H,2.0870504303,-2.32596054  
95,-2.0479303451\\Version=IA64L-G03RevD.01\State=1-A\HF=-14403.2072073  
\RMSD=5.138e-09\RMSF=2.506e-05\ZeroPoint=0.3160266\Thermal=0.3389716\D  
ipole=-0.8097282,-1.5879098,-0.6409399\DipoleDeriv=-0.0386348,-0.02241  
8,-0.0331111,0.0102559,-0.0717757,0.0554105\Polar=319.5632583,-17.4453  
389,250.8023609,-2.9037826,56.077429,191.1464201\PG=C01 [X(C11H23I2N10  
1)]\NImag=0\0.55726317,-0.02985652,0.45689658,-0.00475623,-0.02204629  
546,0.00963572,-0.00814965,0.09378076,0.08188338\0.00000174,0.0000079  
1940,0.00001141,-0.00001195\\\@

ZPVE = 198.30966 kcal/mol

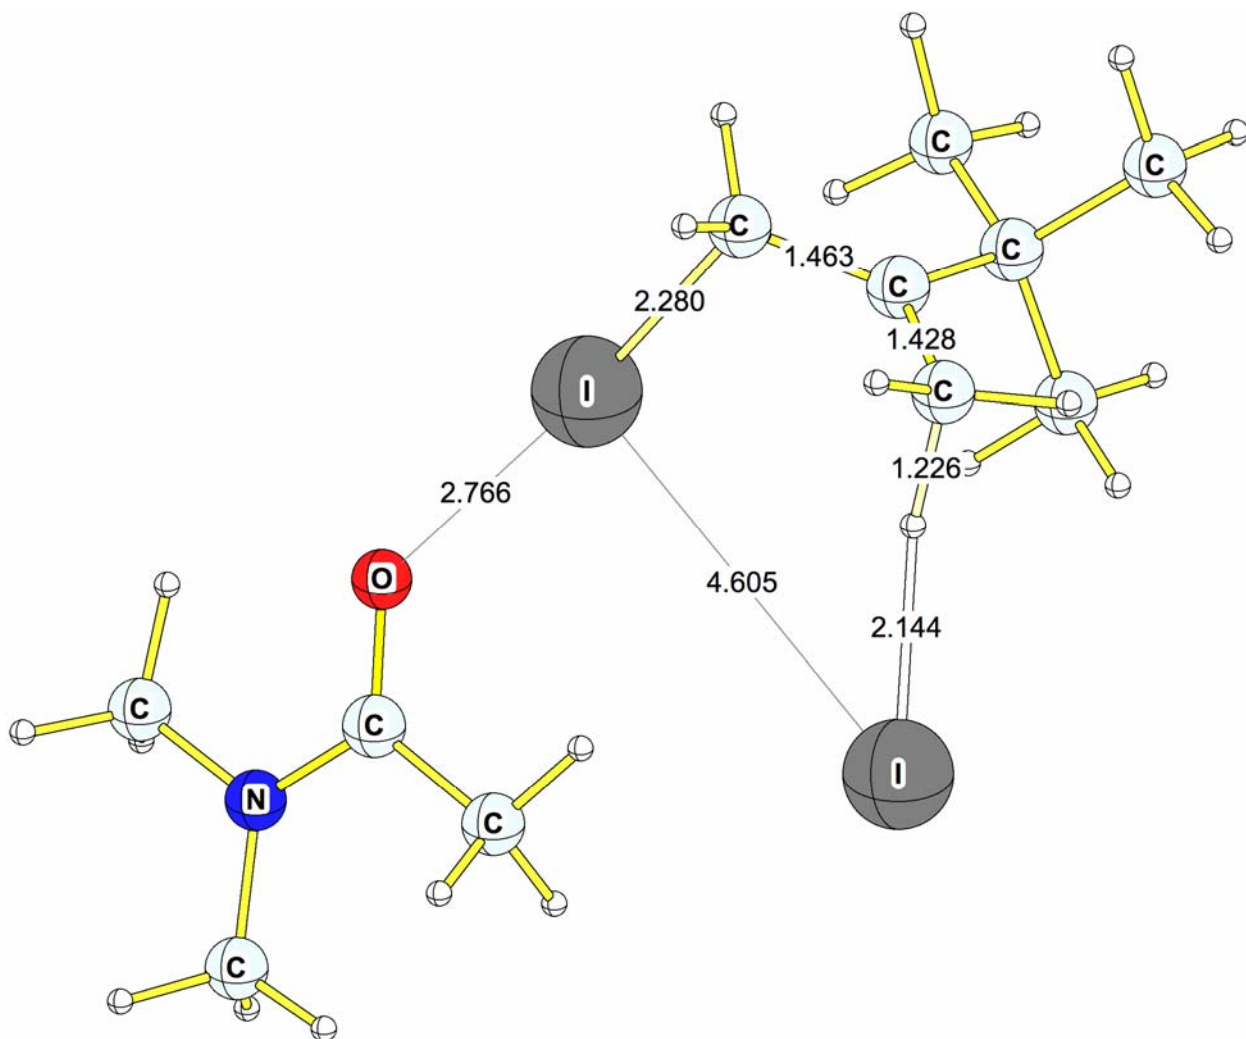

Figure 15 PW91PW91/DZVP computed structure of the DMA---(11)---HI final cluster (FIN)

## 2-Iodo-2-(tert-butyl)propene (11)

```
1\1\GINC-A04\Freq\RPW91PW91\Gen\C7H13I1\TS\20-Nov-2007\0\#\#P PW91PW91/  
gen Freq=NoRaman guess=read geom=check Name=TS\I in  
Me\0,1\C,3.2781480392,1.2173903189,0.0713331464\C,2.3206103332,0.0360583489,0.32291415  
6\H,3.9770034439,1.3151154785,0.9170579129\H,2.7319585844,2.1692585234  
, -0.022814909\H,3.8828507281,1.072336667, -0.8378768995\C,1.2988369194,  
-0.1198762312, -0.815251147\C,1.6081448448,0.268823468,1.6773141518\C,3  
.1680889623, -1.2607830299,0.4145317734\C,0.2224746251, -1.1566763556, -0  
.6750375329\H,0.9445592533, -0.5643522578,1.9532170073\H,2.3592787285,0  
.3724900715,2.4774513326\H,0.9994009619,1.1856342334,1.65777625\H,2.55  
42313115, -2.1460595582,0.643449826\H,3.7014087645, -1.4523451134, -0.529  
9258396\H,3.9164995697, -1.1666912659,1.2180722175\C,1.3581717835,0.573  
5576795, -1.9749574649\H,0.6162474787,0.4120943103, -2.7633177055\H,2.11  
84131005,1.3306538752, -2.1735748128\H, -0.083541615, -1.5745100292, -1.63  
91303628\H,0.459784534, -1.9673914655,0.0215094497\I, -1.7157433513, -0.3  
768196679,0.1272234505\Version=IA64L-G03RevD.01\State=1-A\HF=-7194.64  
86433\RMSD=2.349e-09\RMSF=6.464e-06\ZeroPoint=0.1792601\Thermal=0.1896  
708\Dipole=0.9100723, -0.1414587, -0.1744733\DipoleDeriv=-0.0053971, -0.0
```



ZPVE = 112.48741 kcal/mol

### Hydrogen iodide (HI)

```
1\1\FAU-CCC-CCAT072\FOpt\RPW91PW91\Gen\H111\SHUBINA\20-Nov-2007\0\#\#P  
PW91PW91/GEN OPT FREQ=NORAMAN NAME=SHUBINA\HI\0,1\H,-1.6186190562,-0  
.0000014342,0.0000014342\I,0.0305399822,0.0000000271,-0.0000000271\Ve  
rsion=IA32L-G03RevC.02\State=1-SG\HF=-6920.7945857\RMSD=3.787e-09\RMSF  
=1.449e-04\Dipole=-0.2726894,-0.0000002,0.0000002\PG=C*V [C*(H111)]\ \@
```

ZPVE = 3.16244 kcal/mol

**Table 9** PW91PW91/DZVP ZPVE corrected energies adjusted to the DMF solvent model and  $\omega$ B97XD/DZVP, MP2/DZVP calculated energies

| Name                 | PW91PW91/DZVP,<br>DMF solvent | $\omega$ B97XD/DZVP |                   | MP2/DZVP     |                   |
|----------------------|-------------------------------|---------------------|-------------------|--------------|-------------------|
|                      | E, Hartree                    | E, Hartree          | ZPVE,<br>kcal/mol | E, Hartree   | ZPVE,<br>kcal/mol |
| <b>DMA</b>           | -287.76894                    | -287.76894          | 83.2              | -286.86822   | 82.9              |
| <b>I<sub>2</sub></b> | -13840.03568                  | -13840.03568        | 0.3               | -13834.47196 | 0.3               |
| <b>CTC1</b>          | -14127.81716                  | -14127.81716        | 84.0              | -14121.35381 | 83.8              |
| <b>(4)</b>           | -275.09576                    | -275.09576          | 122.8             | -274.09813   | 122.6             |
| <b>CTC2</b>          | -14402.92530                  | -14402.92530        | 207.7             | -14395.46313 | 206.9             |
| <b>TS</b>            | -14402.85260                  | -14402.85260        | 207.2             | -14395.39328 | 207.1             |
| <b>FIN</b>           | -14402.56848                  | -14402.8932         | 205.0             | -14395.43724 | 203.8             |
| <b>(11)</b>          | -7194.50488                   | -7194.50488         | 116.9             | -7190.74682  | 116.6             |
| <b>HI</b>            | -6920.78289                   | -6920.60606         | 3.3               | -6917.80635  | 3.3               |
